# Supplementary material for: A Novel Phosphopeptide Microarray Based Interactome Map in Breast Cancer Cells Reveals Phosphoprotein-GRB2 Cell Signaling Networks
Source: PLoS One. 2013 Jun 27;8(6):e67634. doi: 10.1371/journal.pone.0067634 (PMC3694890; doi:10.1371/journal.pone.0067634)
Supplement: Table S1 — Layout file of high affinity phosphopeptides selected from recombinant protein binding assays that are substrates for SH2 domain containing proteins for cell lysate assay. (XLSX) [file pone.0067634.s001.xlsx]

## Sheet: Sequence List
	S1 Layout file of high affinity phosphopeptides selected from recombinant protein binding assays that are substraets for SH2 domain containing proteins for cell lysate assay
Index	Reporter Name	Target Sequence (N' to C')	Group	Reporter Control Type	Reporter BioSequence Database Entry[mirna]	Comment	Mouse	Rat
11	A	A	LC Control			Custom Sequence
21	A	A	LC Control			Custom Sequence
30	A	A	LC Control			Custom Sequence
1303	A	A	LC Control			Custom Sequence
1313	A	A	LC Control			Custom Sequence
1323	A	A	LC Control			Custom Sequence
1332	A	A	LC Control			Custom Sequence
2449	A	A	LC Control			Custom Sequence
2605	A	A	LC Control			Custom Sequence
2615	A	A	LC Control			Custom Sequence
2625	A	A	LC Control			Custom Sequence
2634	A	A	LC Control			Custom Sequence
3224	A	A	LC Control			Custom Sequence
3783	A	A	LC Control			Custom Sequence
3793	A	A	LC Control			Custom Sequence
3803	A	A	LC Control			Custom Sequence
3812	A	A	LC Control			Custom Sequence
125	AFM2+	DYKDDDDK	LC Control			Custom Sequence
135	AFM2+	DYKDDDDK	LC Control			Custom Sequence
145	AFM2+	DYKDDDDK	LC Control			Custom Sequence
154	AFM2+	DYKDDDDK	LC Control			Custom Sequence
1427	AFM2+	DYKDDDDK	LC Control			Custom Sequence
1437	AFM2+	DYKDDDDK	LC Control			Custom Sequence
1447	AFM2+	DYKDDDDK	LC Control			Custom Sequence
1456	AFM2+	DYKDDDDK	LC Control			Custom Sequence
2729	AFM2+	DYKDDDDK	LC Control			Custom Sequence
2739	AFM2+	DYKDDDDK	LC Control			Custom Sequence
2749	AFM2+	DYKDDDDK	LC Control			Custom Sequence
2758	AFM2+	DYKDDDDK	LC Control			Custom Sequence
3907	AFM2+	DYKDDDDK	LC Control			Custom Sequence
3917	AFM2+	DYKDDDDK	LC Control			Custom Sequence
3927	AFM2+	DYKDDDDK	LC Control			Custom Sequence
3936	AFM2+	DYKDDDDK	LC Control			Custom Sequence
86	BCAR1_664	yDYVHL	experimental			SRC,NCK1,FYN,FES,LCK
565	BCAR1_664	yDYVHL	experimental			SRC,NCK1,FYN,FES,LCK
1072	BCAR1_664	yDYVHL	experimental			SRC,NCK1,FYN,FES,LCK
1579	BCAR1_664	yDYVHL	experimental			SRC,NCK1,FYN,FES,LCK
1802	BCAR1_664	yDYVHL	experimental			SRC,NCK1,FYN,FES,LCK
1923	BCAR1_664	yDYVHL	experimental			SRC,NCK1,FYN,FES,LCK
2309	BCAR1_664	yDYVHL	experimental			SRC,NCK1,FYN,FES,LCK
2816	BCAR1_664	yDYVHL	experimental			SRC,NCK1,FYN,FES,LCK
3295	BCAR1_664	yDYVHL	experimental			SRC,NCK1,FYN,FES,LCK
3360	BCAR1_664	yDYVHL	experimental			SRC,NCK1,FYN,FES,LCK
3802	BCAR1_664	yDYVHL	experimental			SRC,NCK1,FYN,FES,LCK
117	BCAR1_664/rA1	ADYVHL	experimental			SRC,NCK1,FYN,FES,LCK
596	BCAR1_664/rA1	ADYVHL	experimental			SRC,NCK1,FYN,FES,LCK
1103	BCAR1_664/rA1	ADYVHL	experimental			SRC,NCK1,FYN,FES,LCK
1610	BCAR1_664/rA1	ADYVHL	experimental			SRC,NCK1,FYN,FES,LCK
1833	BCAR1_664/rA1	ADYVHL	experimental			SRC,NCK1,FYN,FES,LCK
1954	BCAR1_664/rA1	ADYVHL	experimental			SRC,NCK1,FYN,FES,LCK
2340	BCAR1_664/rA1	ADYVHL	experimental			SRC,NCK1,FYN,FES,LCK
2847	BCAR1_664/rA1	ADYVHL	experimental			SRC,NCK1,FYN,FES,LCK
3326	BCAR1_664/rA1	ADYVHL	experimental			SRC,NCK1,FYN,FES,LCK
3391	BCAR1_664/rA1	ADYVHL	experimental			SRC,NCK1,FYN,FES,LCK
3833	BCAR1_664/rA1	ADYVHL	experimental			SRC,NCK1,FYN,FES,LCK
2480	C	C	LC Control			Custom Sequence
3255	C	C	LC Control			Custom Sequence
148	CASL_629	yDYVHL	experimental			SRC,FYN
627	CASL_629	yDYVHL	experimental			SRC,FYN
1134	CASL_629	yDYVHL	experimental			SRC,FYN
1641	CASL_629	yDYVHL	experimental			SRC,FYN
1864	CASL_629	yDYVHL	experimental			SRC,FYN
1985	CASL_629	yDYVHL	experimental			SRC,FYN
2371	CASL_629	yDYVHL	experimental			SRC,FYN
2878	CASL_629	yDYVHL	experimental			SRC,FYN
3357	CASL_629	yDYVHL	experimental			SRC,FYN
3422	CASL_629	yDYVHL	experimental			SRC,FYN
3864	CASL_629	yDYVHL	experimental			SRC,FYN
179	CASL_629/rA1	ADYVHL	experimental			SRC,FYN
658	CASL_629/rA1	ADYVHL	experimental			SRC,FYN
1165	CASL_629/rA1	ADYVHL	experimental			SRC,FYN
1672	CASL_629/rA1	ADYVHL	experimental			SRC,FYN
1895	CASL_629/rA1	ADYVHL	experimental			SRC,FYN
2016	CASL_629/rA1	ADYVHL	experimental			SRC,FYN
2402	CASL_629/rA1	ADYVHL	experimental			SRC,FYN
2909	CASL_629/rA1	ADYVHL	experimental			SRC,FYN
3388	CASL_629/rA1	ADYVHL	experimental			SRC,FYN
3453	CASL_629/rA1	ADYVHL	experimental			SRC,FYN
3895	CASL_629/rA1	ADYVHL	experimental			SRC,FYN
203	CBL_869	ySYQDI	experimental			CRKL
403	CBL_869	ySYQDI	experimental			CRKL
710	CBL_869	ySYQDI	experimental			CRKL
933	CBL_869	ySYQDI	experimental			CRKL
1440	CBL_869	ySYQDI	experimental			CRKL
1561	CBL_869	ySYQDI	experimental			CRKL
1947	CBL_869	ySYQDI	experimental			CRKL
2426	CBL_869	ySYQDI	experimental			CRKL
2933	CBL_869	ySYQDI	experimental			CRKL
2998	CBL_869	ySYQDI	experimental			CRKL
3663	CBL_869	ySYQDI	experimental			CRKL
234	CBL_869/rA1	ASYQDI	experimental			CRKL
434	CBL_869/rA1	ASYQDI	experimental			CRKL
741	CBL_869/rA1	ASYQDI	experimental			CRKL
964	CBL_869/rA1	ASYQDI	experimental			CRKL
1471	CBL_869/rA1	ASYQDI	experimental			CRKL
1592	CBL_869/rA1	ASYQDI	experimental			CRKL
1978	CBL_869/rA1	ASYQDI	experimental			CRKL
2457	CBL_869/rA1	ASYQDI	experimental			CRKL
2964	CBL_869/rA1	ASYQDI	experimental			CRKL
3029	CBL_869/rA1	ASYQDI	experimental			CRKL
3694	CBL_869/rA1	ASYQDI	experimental			CRKL
393	CD22_762	yTTLRF	experimental			PTPN6
458	CD22_762	yTTLRF	experimental			PTPN6
937	CD22_762	yTTLRF	experimental			PTPN6
1444	CD22_762	yTTLRF	experimental			PTPN6
1951	CD22_762	yTTLRF	experimental			PTPN6
2174	CD22_762	yTTLRF	experimental			PTPN6
2295	CD22_762	yTTLRF	experimental			PTPN6
2681	CD22_762	yTTLRF	experimental			PTPN6
3188	CD22_762	yTTLRF	experimental			PTPN6
3667	CD22_762	yTTLRF	experimental			PTPN6
3732	CD22_762	yTTLRF	experimental			PTPN6
424	CD22_762/rA1	ATTLRF	experimental			PTPN6
489	CD22_762/rA1	ATTLRF	experimental			PTPN6
968	CD22_762/rA1	ATTLRF	experimental			PTPN6
1475	CD22_762/rA1	ATTLRF	experimental			PTPN6
1982	CD22_762/rA1	ATTLRF	experimental			PTPN6
2205	CD22_762/rA1	ATTLRF	experimental			PTPN6
2326	CD22_762/rA1	ATTLRF	experimental			PTPN6
2712	CD22_762/rA1	ATTLRF	experimental			PTPN6
3219	CD22_762/rA1	ATTLRF	experimental			PTPN6
3698	CD22_762/rA1	ATTLRF	experimental			PTPN6
3763	CD22_762/rA1	ATTLRF	experimental			PTPN6
254	CD22_822	ySELIQ	experimental			PTPN6
761	CD22_822	ySELIQ	experimental			PTPN6
961	CD22_822	ySELIQ	experimental			PTPN6
1268	CD22_822	ySELIQ	experimental			PTPN6
1491	CD22_822	ySELIQ	experimental			PTPN6
1998	CD22_822	ySELIQ	experimental			PTPN6
2119	CD22_822	ySELIQ	experimental			PTPN6
2505	CD22_822	ySELIQ	experimental			PTPN6
2984	CD22_822	ySELIQ	experimental			PTPN6
3491	CD22_822	ySELIQ	experimental			PTPN6
3556	CD22_822	ySELIQ	experimental			PTPN6
285	CD22_822/rA1	ASELIQ	experimental			PTPN6
792	CD22_822/rA1	ASELIQ	experimental			PTPN6
992	CD22_822/rA1	ASELIQ	experimental			PTPN6
1299	CD22_822/rA1	ASELIQ	experimental			PTPN6
1522	CD22_822/rA1	ASELIQ	experimental			PTPN6
2029	CD22_822/rA1	ASELIQ	experimental			PTPN6
2150	CD22_822/rA1	ASELIQ	experimental			PTPN6
2536	CD22_822/rA1	ASELIQ	experimental			PTPN6
3015	CD22_822/rA1	ASELIQ	experimental			PTPN6
3522	CD22_822/rA1	ASELIQ	experimental			PTPN6
3587	CD22_822/rA1	ASELIQ	experimental			PTPN6
210	CD300A_267	yASVVF	experimental			PTPN11,PTPN6
689	CD300A_267	yASVVF	experimental			PTPN11,PTPN6
1196	CD300A_267	yASVVF	experimental			PTPN11,PTPN6
1703	CD300A_267	yASVVF	experimental			PTPN11,PTPN6
1926	CD300A_267	yASVVF	experimental			PTPN11,PTPN6
2047	CD300A_267	yASVVF	experimental			PTPN11,PTPN6
2433	CD300A_267	yASVVF	experimental			PTPN11,PTPN6
2940	CD300A_267	yASVVF	experimental			PTPN11,PTPN6
3419	CD300A_267	yASVVF	experimental			PTPN11,PTPN6
3484	CD300A_267	yASVVF	experimental			PTPN11,PTPN6
3926	CD300A_267	yASVVF	experimental			PTPN11,PTPN6
241	CD300A_267/rA1	AASVVF	experimental			PTPN11,PTPN6
720	CD300A_267/rA1	AASVVF	experimental			PTPN11,PTPN6
1227	CD300A_267/rA1	AASVVF	experimental			PTPN11,PTPN6
1734	CD300A_267/rA1	AASVVF	experimental			PTPN11,PTPN6
1957	CD300A_267/rA1	AASVVF	experimental			PTPN11,PTPN6
2078	CD300A_267/rA1	AASVVF	experimental			PTPN11,PTPN6
2464	CD300A_267/rA1	AASVVF	experimental			PTPN11,PTPN6
2971	CD300A_267/rA1	AASVVF	experimental			PTPN11,PTPN6
3450	CD300A_267/rA1	AASVVF	experimental			PTPN11,PTPN6
3515	CD300A_267/rA1	AASVVF	experimental			PTPN11,PTPN6
3957	CD300A_267/rA1	AASVVF	experimental			PTPN11,PTPN6
327	CD33_340	yASLNF	experimental			PTPN11,PTPN6
527	CD33_340	yASLNF	experimental			PTPN11,PTPN6
834	CD33_340	yASLNF	experimental			PTPN11,PTPN6
1057	CD33_340	yASLNF	experimental			PTPN11,PTPN6
1564	CD33_340	yASLNF	experimental			PTPN11,PTPN6
1685	CD33_340	yASLNF	experimental			PTPN11,PTPN6
2071	CD33_340	yASLNF	experimental			PTPN11,PTPN6
2550	CD33_340	yASLNF	experimental			PTPN11,PTPN6
3057	CD33_340	yASLNF	experimental			PTPN11,PTPN6
3122	CD33_340	yASLNF	experimental			PTPN11,PTPN6
3787	CD33_340	yASLNF	experimental			PTPN11,PTPN6
358	CD33_340/rA1	AASLNF	experimental			PTPN11,PTPN6
558	CD33_340/rA1	AASLNF	experimental			PTPN11,PTPN6
865	CD33_340/rA1	AASLNF	experimental			PTPN11,PTPN6
1088	CD33_340/rA1	AASLNF	experimental			PTPN11,PTPN6
1595	CD33_340/rA1	AASLNF	experimental			PTPN11,PTPN6
1716	CD33_340/rA1	AASLNF	experimental			PTPN11,PTPN6
2102	CD33_340/rA1	AASLNF	experimental			PTPN11,PTPN6
2581	CD33_340/rA1	AASLNF	experimental			PTPN11,PTPN6
3088	CD33_340/rA1	AASLNF	experimental			PTPN11,PTPN6
3153	CD33_340/rA1	AASLNF	experimental			PTPN11,PTPN6
3818	CD33_340/rA1	AASLNF	experimental			PTPN11,PTPN6
398	CD3D_160	ySHLGG	experimental			SYK,SHC1,ZAP70
570	CD3D_160	ySHLGG	experimental			SYK,SHC1,ZAP70
877	CD3D_160	ySHLGG	experimental			SYK,SHC1,ZAP70
1384	CD3D_160	ySHLGG	experimental			SYK,SHC1,ZAP70
1635	CD3D_160	ySHLGG	experimental			SYK,SHC1,ZAP70
2114	CD3D_160	ySHLGG	experimental			SYK,SHC1,ZAP70
2621	CD3D_160	ySHLGG	experimental			SYK,SHC1,ZAP70
3128	CD3D_160	ySHLGG	experimental			SYK,SHC1,ZAP70
3351	CD3D_160	ySHLGG	experimental			SYK,SHC1,ZAP70
3858	CD3D_160	ySHLGG	experimental			SYK,SHC1,ZAP70
429	CD3D_160/rA1	ASHLGG	experimental			SYK,SHC1,ZAP70
601	CD3D_160/rA1	ASHLGG	experimental			SYK,SHC1,ZAP70
908	CD3D_160/rA1	ASHLGG	experimental			SYK,SHC1,ZAP70
1415	CD3D_160/rA1	ASHLGG	experimental			SYK,SHC1,ZAP70
1666	CD3D_160/rA1	ASHLGG	experimental			SYK,SHC1,ZAP70
2145	CD3D_160/rA1	ASHLGG	experimental			SYK,SHC1,ZAP70
2652	CD3D_160/rA1	ASHLGG	experimental			SYK,SHC1,ZAP70
3159	CD3D_160/rA1	ASHLGG	experimental			SYK,SHC1,ZAP70
3382	CD3D_160/rA1	ASHLGG	experimental			SYK,SHC1,ZAP70
3889	CD3D_160/rA1	ASHLGG	experimental			SYK,SHC1,ZAP70
215	CD84_279	yTYIMA	experimental			SH2D1B,PTPN11,SH2D1A,INPP5D,PTPN6
373	CD84_279	yTYIMA	experimental			SH2D1B,PTPN11,SH2D1A,INPP5D,PTPN6
438	CD84_279	yTYIMA	experimental			SH2D1B,PTPN11,SH2D1A,INPP5D,PTPN6
945	CD84_279	yTYIMA	experimental			SH2D1B,PTPN11,SH2D1A,INPP5D,PTPN6
1452	CD84_279	yTYIMA	experimental			SH2D1B,PTPN11,SH2D1A,INPP5D,PTPN6
1810	CD84_279	yTYIMA	experimental			SH2D1B,PTPN11,SH2D1A,INPP5D,PTPN6
1931	CD84_279	yTYIMA	experimental			SH2D1B,PTPN11,SH2D1A,INPP5D,PTPN6
2438	CD84_279	yTYIMA	experimental			SH2D1B,PTPN11,SH2D1A,INPP5D,PTPN6
2689	CD84_279	yTYIMA	experimental			SH2D1B,PTPN11,SH2D1A,INPP5D,PTPN6
3168	CD84_279	yTYIMA	experimental			SH2D1B,PTPN11,SH2D1A,INPP5D,PTPN6
3675	CD84_279	yTYIMA	experimental			SH2D1B,PTPN11,SH2D1A,INPP5D,PTPN6
246	CD84_279/rA1	ATYIMA	experimental			SH2D1B,PTPN11,SH2D1A,INPP5D,PTPN6
404	CD84_279/rA1	ATYIMA	experimental			SH2D1B,PTPN11,SH2D1A,INPP5D,PTPN6
469	CD84_279/rA1	ATYIMA	experimental			SH2D1B,PTPN11,SH2D1A,INPP5D,PTPN6
976	CD84_279/rA1	ATYIMA	experimental			SH2D1B,PTPN11,SH2D1A,INPP5D,PTPN6
1483	CD84_279/rA1	ATYIMA	experimental			SH2D1B,PTPN11,SH2D1A,INPP5D,PTPN6
1841	CD84_279/rA1	ATYIMA	experimental			SH2D1B,PTPN11,SH2D1A,INPP5D,PTPN6
1962	CD84_279/rA1	ATYIMA	experimental			SH2D1B,PTPN11,SH2D1A,INPP5D,PTPN6
2469	CD84_279/rA1	ATYIMA	experimental			SH2D1B,PTPN11,SH2D1A,INPP5D,PTPN6
2720	CD84_279/rA1	ATYIMA	experimental			SH2D1B,PTPN11,SH2D1A,INPP5D,PTPN6
3199	CD84_279/rA1	ATYIMA	experimental			SH2D1B,PTPN11,SH2D1A,INPP5D,PTPN6
3706	CD84_279/rA1	ATYIMA	experimental			SH2D1B,PTPN11,SH2D1A,INPP5D,PTPN6
82	CEACAM1_493	ySTLNF	experimental			PTPN11,PTPN6
333	CEACAM1_493	ySTLNF	experimental			PTPN11,PTPN6
812	CEACAM1_493	ySTLNF	experimental			PTPN11,PTPN6
1319	CEACAM1_493	ySTLNF	experimental			PTPN11,PTPN6
1705	CEACAM1_493	ySTLNF	experimental			PTPN11,PTPN6
1826	CEACAM1_493	ySTLNF	experimental			PTPN11,PTPN6
2049	CEACAM1_493	ySTLNF	experimental			PTPN11,PTPN6
2556	CEACAM1_493	ySTLNF	experimental			PTPN11,PTPN6
2863	CEACAM1_493	ySTLNF	experimental			PTPN11,PTPN6
3063	CEACAM1_493	ySTLNF	experimental			PTPN11,PTPN6
3542	CEACAM1_493	ySTLNF	experimental			PTPN11,PTPN6
113	CEACAM1_493/rA1	ASTLNF	experimental			PTPN11,PTPN6
364	CEACAM1_493/rA1	ASTLNF	experimental			PTPN11,PTPN6
843	CEACAM1_493/rA1	ASTLNF	experimental			PTPN11,PTPN6
1350	CEACAM1_493/rA1	ASTLNF	experimental			PTPN11,PTPN6
1736	CEACAM1_493/rA1	ASTLNF	experimental			PTPN11,PTPN6
1857	CEACAM1_493/rA1	ASTLNF	experimental			PTPN11,PTPN6
2080	CEACAM1_493/rA1	ASTLNF	experimental			PTPN11,PTPN6
2587	CEACAM1_493/rA1	ASTLNF	experimental			PTPN11,PTPN6
2894	CEACAM1_493/rA1	ASTLNF	experimental			PTPN11,PTPN6
3094	CEACAM1_493/rA1	ASTLNF	experimental			PTPN11,PTPN6
3573	CEACAM1_493/rA1	ASTLNF	experimental			PTPN11,PTPN6
194	CelLET23_1290	yYNEPH	experimental			GRB2
394	CelLET23_1290	yYNEPH	experimental			GRB2
701	CelLET23_1290	yYNEPH	experimental			GRB2
1431	CelLET23_1290	yYNEPH	experimental			GRB2
1580	CelLET23_1290	yYNEPH	experimental			GRB2
1938	CelLET23_1290	yYNEPH	experimental			GRB2
2296	CelLET23_1290	yYNEPH	experimental			GRB2
2445	CelLET23_1290	yYNEPH	experimental			GRB2
2924	CelLET23_1290	yYNEPH	experimental			GRB2
3175	CelLET23_1290	yYNEPH	experimental			GRB2
3682	CelLET23_1290	yYNEPH	experimental			GRB2
225	CelLET23_1290/rA1	AYNEPH	experimental			GRB2
425	CelLET23_1290/rA1	AYNEPH	experimental			GRB2
732	CelLET23_1290/rA1	AYNEPH	experimental			GRB2
1462	CelLET23_1290/rA1	AYNEPH	experimental			GRB2
1611	CelLET23_1290/rA1	AYNEPH	experimental			GRB2
1969	CelLET23_1290/rA1	AYNEPH	experimental			GRB2
2327	CelLET23_1290/rA1	AYNEPH	experimental			GRB2
2476	CelLET23_1290/rA1	AYNEPH	experimental			GRB2
2955	CelLET23_1290/rA1	AYNEPH	experimental			GRB2
3206	CelLET23_1290/rA1	AYNEPH	experimental			GRB2
3713	CelLET23_1290/rA1	AYNEPH	experimental			GRB2
68	CLM1_249	yASLTL	experimental			INPP5D,PTPN6
575	CLM1_249	yASLTL	experimental			INPP5D,PTPN6
775	CLM1_249	yASLTL	experimental			INPP5D,PTPN6
1082	CLM1_249	yASLTL	experimental			INPP5D,PTPN6
1305	CLM1_249	yASLTL	experimental			INPP5D,PTPN6
1812	CLM1_249	yASLTL	experimental			INPP5D,PTPN6
1933	CLM1_249	yASLTL	experimental			INPP5D,PTPN6
2319	CLM1_249	yASLTL	experimental			INPP5D,PTPN6
2798	CLM1_249	yASLTL	experimental			INPP5D,PTPN6
3305	CLM1_249	yASLTL	experimental			INPP5D,PTPN6
3370	CLM1_249	yASLTL	experimental			INPP5D,PTPN6
99	CLM1_249/rA1	AASLTL	experimental			INPP5D,PTPN6
606	CLM1_249/rA1	AASLTL	experimental			INPP5D,PTPN6
806	CLM1_249/rA1	AASLTL	experimental			INPP5D,PTPN6
1113	CLM1_249/rA1	AASLTL	experimental			INPP5D,PTPN6
1336	CLM1_249/rA1	AASLTL	experimental			INPP5D,PTPN6
1843	CLM1_249/rA1	AASLTL	experimental			INPP5D,PTPN6
1964	CLM1_249/rA1	AASLTL	experimental			INPP5D,PTPN6
2350	CLM1_249/rA1	AASLTL	experimental			INPP5D,PTPN6
2829	CLM1_249/rA1	AASLTL	experimental			INPP5D,PTPN6
3336	CLM1_249/rA1	AASLTL	experimental			INPP5D,PTPN6
3401	CLM1_249/rA1	AASLTL	experimental			INPP5D,PTPN6
156	CRP	WTPPFKTR	LC Control			Custom Sequence
166	CRP	WTPPFKTR	LC Control			Custom Sequence
176	CRP	WTPPFKTR	LC Control			Custom Sequence
185	CRP	WTPPFKTR	LC Control			Custom Sequence
1458	CRP	WTPPFKTR	LC Control			Custom Sequence
1468	CRP	WTPPFKTR	LC Control			Custom Sequence
1478	CRP	WTPPFKTR	LC Control			Custom Sequence
1487	CRP	WTPPFKTR	LC Control			Custom Sequence
2760	CRP	WTPPFKTR	LC Control			Custom Sequence
2770	CRP	WTPPFKTR	LC Control			Custom Sequence
2780	CRP	WTPPFKTR	LC Control			Custom Sequence
2789	CRP	WTPPFKTR	LC Control			Custom Sequence
3938	CRP	WTPPFKTR	LC Control			Custom Sequence
3948	CRP	WTPPFKTR	LC Control			Custom Sequence
3958	CRP	WTPPFKTR	LC Control			Custom Sequence
3967	CRP	WTPPFKTR	LC Control			Custom Sequence
143	CSF1R_923	yANLPS	experimental			GRB2
836	CSF1R_923	yANLPS	experimental			GRB2
873	CSF1R_923	yANLPS	experimental			GRB2
1380	CSF1R_923	yANLPS	experimental			GRB2
1738	CSF1R_923	yANLPS	experimental			GRB2
1887	CSF1R_923	yANLPS	experimental			GRB2
2366	CSF1R_923	yANLPS	experimental			GRB2
2617	CSF1R_923	yANLPS	experimental			GRB2
3124	CSF1R_923	yANLPS	experimental			GRB2
3431	CSF1R_923	yANLPS	experimental			GRB2
3603	CSF1R_923	yANLPS	experimental			GRB2
174	CSF1R_923/rA1	AANLPS	experimental			GRB2
867	CSF1R_923/rA1	AANLPS	experimental			GRB2
904	CSF1R_923/rA1	AANLPS	experimental			GRB2
1411	CSF1R_923/rA1	AANLPS	experimental			GRB2
1769	CSF1R_923/rA1	AANLPS	experimental			GRB2
1918	CSF1R_923/rA1	AANLPS	experimental			GRB2
2397	CSF1R_923/rA1	AANLPS	experimental			GRB2
2648	CSF1R_923/rA1	AANLPS	experimental			GRB2
3155	CSF1R_923/rA1	AANLPS	experimental			GRB2
3462	CSF1R_923/rA1	AANLPS	experimental			GRB2
3634	CSF1R_923/rA1	AANLPS	experimental			GRB2
382	CSF3R_787	yENLWF	experimental			SYK,SH3BP2
633	CSF3R_787	yENLWF	experimental			SYK,SH3BP2
1075	CSF3R_787	yENLWF	experimental			SYK,SH3BP2
1140	CSF3R_787	yENLWF	experimental			SYK,SH3BP2
1619	CSF3R_787	yENLWF	experimental			SYK,SH3BP2
2126	CSF3R_787	yENLWF	experimental			SYK,SH3BP2
2633	CSF3R_787	yENLWF	experimental			SYK,SH3BP2
2856	CSF3R_787	yENLWF	experimental			SYK,SH3BP2
3163	CSF3R_787	yENLWF	experimental			SYK,SH3BP2
3363	CSF3R_787	yENLWF	experimental			SYK,SH3BP2
3870	CSF3R_787	yENLWF	experimental			SYK,SH3BP2
413	CSF3R_787/rA1	AENLWF	experimental			SYK,SH3BP2
664	CSF3R_787/rA1	AENLWF	experimental			SYK,SH3BP2
1106	CSF3R_787/rA1	AENLWF	experimental			SYK,SH3BP2
1171	CSF3R_787/rA1	AENLWF	experimental			SYK,SH3BP2
1650	CSF3R_787/rA1	AENLWF	experimental			SYK,SH3BP2
2157	CSF3R_787/rA1	AENLWF	experimental			SYK,SH3BP2
2664	CSF3R_787/rA1	AENLWF	experimental			SYK,SH3BP2
2887	CSF3R_787/rA1	AENLWF	experimental			SYK,SH3BP2
3194	CSF3R_787/rA1	AENLWF	experimental			SYK,SH3BP2
3394	CSF3R_787/rA1	AENLWF	experimental			SYK,SH3BP2
3901	CSF3R_787/rA1	AENLWF	experimental			SYK,SH3BP2
277	CTLA4_177	ySFLLT	experimental			PTPN11,FYN
435	CTLA4_177	ySFLLT	experimental			PTPN11,FYN
500	CTLA4_177	ySFLLT	experimental			PTPN11,FYN
1007	CTLA4_177	ySFLLT	experimental			PTPN11,FYN
1514	CTLA4_177	ySFLLT	experimental			PTPN11,FYN
1872	CTLA4_177	ySFLLT	experimental			PTPN11,FYN
1993	CTLA4_177	ySFLLT	experimental			PTPN11,FYN
2500	CTLA4_177	ySFLLT	experimental			PTPN11,FYN
2751	CTLA4_177	ySFLLT	experimental			PTPN11,FYN
3230	CTLA4_177	ySFLLT	experimental			PTPN11,FYN
3737	CTLA4_177	ySFLLT	experimental			PTPN11,FYN
308	CTLA4_177/rA1	ASFLLT	experimental			PTPN11,FYN
466	CTLA4_177/rA1	ASFLLT	experimental			PTPN11,FYN
531	CTLA4_177/rA1	ASFLLT	experimental			PTPN11,FYN
1038	CTLA4_177/rA1	ASFLLT	experimental			PTPN11,FYN
1545	CTLA4_177/rA1	ASFLLT	experimental			PTPN11,FYN
1903	CTLA4_177/rA1	ASFLLT	experimental			PTPN11,FYN
2024	CTLA4_177/rA1	ASFLLT	experimental			PTPN11,FYN
2531	CTLA4_177/rA1	ASFLLT	experimental			PTPN11,FYN
2782	CTLA4_177/rA1	ASFLLT	experimental			PTPN11,FYN
3261	CTLA4_177/rA1	ASFLLT	experimental			PTPN11,FYN
3768	CTLA4_177/rA1	ASFLLT	experimental			PTPN11,FYN
400	CTNND1_656	yELLFQ	experimental			PTPN6
623	CTNND1_656	yELLFQ	experimental			PTPN6
1065	CTNND1_656	yELLFQ	experimental			PTPN6
1130	CTNND1_656	yELLFQ	experimental			PTPN6
1637	CTNND1_656	yELLFQ	experimental			PTPN6
2116	CTNND1_656	yELLFQ	experimental			PTPN6
2502	CTNND1_656	yELLFQ	experimental			PTPN6
2623	CTNND1_656	yELLFQ	experimental			PTPN6
3353	CTNND1_656	yELLFQ	experimental			PTPN6
3688	CTNND1_656	yELLFQ	experimental			PTPN6
3860	CTNND1_656	yELLFQ	experimental			PTPN6
431	CTNND1_656/rA1	AELLFQ	experimental			PTPN6
654	CTNND1_656/rA1	AELLFQ	experimental			PTPN6
1096	CTNND1_656/rA1	AELLFQ	experimental			PTPN6
1161	CTNND1_656/rA1	AELLFQ	experimental			PTPN6
1668	CTNND1_656/rA1	AELLFQ	experimental			PTPN6
2147	CTNND1_656/rA1	AELLFQ	experimental			PTPN6
2533	CTNND1_656/rA1	AELLFQ	experimental			PTPN6
2654	CTNND1_656/rA1	AELLFQ	experimental			PTPN6
3384	CTNND1_656/rA1	AELLFQ	experimental			PTPN6
3719	CTNND1_656/rA1	AELLFQ	experimental			PTPN6
3891	CTNND1_656/rA1	AELLFQ	experimental			PTPN6
150	CXCR7_315	ySFINR	experimental			PTPN11,PTPN6
322	CXCR7_315	ySFINR	experimental			PTPN11,PTPN6
629	CXCR7_315	ySFINR	experimental			PTPN11,PTPN6
1136	CXCR7_315	ySFINR	experimental			PTPN11,PTPN6
1387	CXCR7_315	ySFINR	experimental			PTPN11,PTPN6
1866	CXCR7_315	ySFINR	experimental			PTPN11,PTPN6
2373	CXCR7_315	ySFINR	experimental			PTPN11,PTPN6
2880	CXCR7_315	ySFINR	experimental			PTPN11,PTPN6
3103	CXCR7_315	ySFINR	experimental			PTPN11,PTPN6
3610	CXCR7_315	ySFINR	experimental			PTPN11,PTPN6
181	CXCR7_315/rA1	ASFINR	experimental			PTPN11,PTPN6
353	CXCR7_315/rA1	ASFINR	experimental			PTPN11,PTPN6
660	CXCR7_315/rA1	ASFINR	experimental			PTPN11,PTPN6
1167	CXCR7_315/rA1	ASFINR	experimental			PTPN11,PTPN6
1418	CXCR7_315/rA1	ASFINR	experimental			PTPN11,PTPN6
1897	CXCR7_315/rA1	ASFINR	experimental			PTPN11,PTPN6
2404	CXCR7_315/rA1	ASFINR	experimental			PTPN11,PTPN6
2911	CXCR7_315/rA1	ASFINR	experimental			PTPN11,PTPN6
3134	CXCR7_315/rA1	ASFINR	experimental			PTPN11,PTPN6
3641	CXCR7_315/rA1	ASFINR	experimental			PTPN11,PTPN6
2511	D	D	LC Control			Custom Sequence
3286	D	D	LC Control			Custom Sequence
401	DAB1_198	yQYIVF	experimental			SRC,FYN
559	DAB1_198	yQYIVF	experimental			SRC,FYN
624	DAB1_198	yQYIVF	experimental			SRC,FYN
1131	DAB1_198	yQYIVF	experimental			SRC,FYN
1638	DAB1_198	yQYIVF	experimental			SRC,FYN
1996	DAB1_198	yQYIVF	experimental			SRC,FYN
2117	DAB1_198	yQYIVF	experimental			SRC,FYN
2624	DAB1_198	yQYIVF	experimental			SRC,FYN
2875	DAB1_198	yQYIVF	experimental			SRC,FYN
3354	DAB1_198	yQYIVF	experimental			SRC,FYN
3861	DAB1_198	yQYIVF	experimental			SRC,FYN
432	DAB1_198/rA1	AQYIVF	experimental			SRC,FYN
590	DAB1_198/rA1	AQYIVF	experimental			SRC,FYN
655	DAB1_198/rA1	AQYIVF	experimental			SRC,FYN
1162	DAB1_198/rA1	AQYIVF	experimental			SRC,FYN
1669	DAB1_198/rA1	AQYIVF	experimental			SRC,FYN
2027	DAB1_198/rA1	AQYIVF	experimental			SRC,FYN
2148	DAB1_198/rA1	AQYIVF	experimental			SRC,FYN
2655	DAB1_198/rA1	AQYIVF	experimental			SRC,FYN
2906	DAB1_198/rA1	AQYIVF	experimental			SRC,FYN
3385	DAB1_198/rA1	AQYIVF	experimental			SRC,FYN
3892	DAB1_198/rA1	AQYIVF	experimental			SRC,FYN
131	DYRA_219	yYIVHL	experimental			DYRA_HUMAN
638	DYRA_219	yYIVHL	experimental			DYRA_HUMAN
1145	DYRA_219	yYIVHL	experimental			DYRA_HUMAN
1368	DYRA_219	yYIVHL	experimental			DYRA_HUMAN
1489	DYRA_219	yYIVHL	experimental			DYRA_HUMAN
1875	DYRA_219	yYIVHL	experimental			DYRA_HUMAN
2382	DYRA_219	yYIVHL	experimental			DYRA_HUMAN
2861	DYRA_219	yYIVHL	experimental			DYRA_HUMAN
2926	DYRA_219	yYIVHL	experimental			DYRA_HUMAN
3368	DYRA_219	yYIVHL	experimental			DYRA_HUMAN
3619	DYRA_219	yYIVHL	experimental			DYRA_HUMAN
162	DYRA_219/rA1	AYIVHL	experimental			DYRA_HUMAN
669	DYRA_219/rA1	AYIVHL	experimental			DYRA_HUMAN
1176	DYRA_219/rA1	AYIVHL	experimental			DYRA_HUMAN
1399	DYRA_219/rA1	AYIVHL	experimental			DYRA_HUMAN
1520	DYRA_219/rA1	AYIVHL	experimental			DYRA_HUMAN
1906	DYRA_219/rA1	AYIVHL	experimental			DYRA_HUMAN
2413	DYRA_219/rA1	AYIVHL	experimental			DYRA_HUMAN
2892	DYRA_219/rA1	AYIVHL	experimental			DYRA_HUMAN
2957	DYRA_219/rA1	AYIVHL	experimental			DYRA_HUMAN
3399	DYRA_219/rA1	AYIVHL	experimental			DYRA_HUMAN
3650	DYRA_219/rA1	AYIVHL	experimental			DYRA_HUMAN
202	DYST_959	yQNVLT	experimental			GRB2
374	DYST_959	yQNVLT	experimental			GRB2
709	DYST_959	yQNVLT	experimental			GRB2
1188	DYST_959	yQNVLT	experimental			GRB2
1439	DYST_959	yQNVLT	experimental			GRB2
1946	DYST_959	yQNVLT	experimental			GRB2
2067	DYST_959	yQNVLT	experimental			GRB2
2425	DYST_959	yQNVLT	experimental			GRB2
2932	DYST_959	yQNVLT	experimental			GRB2
3439	DYST_959	yQNVLT	experimental			GRB2
3662	DYST_959	yQNVLT	experimental			GRB2
233	DYST_959/rA1	AQNVLT	experimental			GRB2
405	DYST_959/rA1	AQNVLT	experimental			GRB2
740	DYST_959/rA1	AQNVLT	experimental			GRB2
1219	DYST_959/rA1	AQNVLT	experimental			GRB2
1470	DYST_959/rA1	AQNVLT	experimental			GRB2
1977	DYST_959/rA1	AQNVLT	experimental			GRB2
2098	DYST_959/rA1	AQNVLT	experimental			GRB2
2456	DYST_959/rA1	AQNVLT	experimental			GRB2
2963	DYST_959/rA1	AQNVLT	experimental			GRB2
3470	DYST_959/rA1	AQNVLT	experimental			GRB2
3693	DYST_959/rA1	AQNVLT	experimental			GRB2
2542	E	E	LC Control			Custom Sequence
3317	E	E	LC Control			Custom Sequence
211	EGFR_1110	yYNQPN	experimental			GRB2
690	EGFR_1110	yYNQPN	experimental			GRB2
890	EGFR_1110	yYNQPN	experimental			GRB2
1197	EGFR_1110	yYNQPN	experimental			GRB2
1927	EGFR_1110	yYNQPN	experimental			GRB2
2076	EGFR_1110	yYNQPN	experimental			GRB2
2434	EGFR_1110	yYNQPN	experimental			GRB2
2941	EGFR_1110	yYNQPN	experimental			GRB2
2978	EGFR_1110	yYNQPN	experimental			GRB2
3420	EGFR_1110	yYNQPN	experimental			GRB2
3671	EGFR_1110	yYNQPN	experimental			GRB2
242	EGFR_1110/rA1	AYNQPN	experimental			GRB2
721	EGFR_1110/rA1	AYNQPN	experimental			GRB2
921	EGFR_1110/rA1	AYNQPN	experimental			GRB2
1228	EGFR_1110/rA1	AYNQPN	experimental			GRB2
1958	EGFR_1110/rA1	AYNQPN	experimental			GRB2
2107	EGFR_1110/rA1	AYNQPN	experimental			GRB2
2465	EGFR_1110/rA1	AYNQPN	experimental			GRB2
2972	EGFR_1110/rA1	AYNQPN	experimental			GRB2
3009	EGFR_1110/rA1	AYNQPN	experimental			GRB2
3451	EGFR_1110/rA1	AYNQPN	experimental			GRB2
3702	EGFR_1110/rA1	AYNQPN	experimental			GRB2
335	EGFR_113	yENSYA	experimental			GRB2
814	EGFR_113	yENSYA	experimental			GRB2
1014	EGFR_113	yENSYA	experimental			GRB2
1321	EGFR_113	yENSYA	experimental			GRB2
2051	EGFR_113	yENSYA	experimental			GRB2
2200	EGFR_113	yENSYA	experimental			GRB2
2558	EGFR_113	yENSYA	experimental			GRB2
3065	EGFR_113	yENSYA	experimental			GRB2
3102	EGFR_113	yENSYA	experimental			GRB2
3544	EGFR_113	yENSYA	experimental			GRB2
3795	EGFR_113	yENSYA	experimental			GRB2
366	EGFR_113/rA1	AENSYA	experimental			GRB2
845	EGFR_113/rA1	AENSYA	experimental			GRB2
1045	EGFR_113/rA1	AENSYA	experimental			GRB2
1352	EGFR_113/rA1	AENSYA	experimental			GRB2
2082	EGFR_113/rA1	AENSYA	experimental			GRB2
2231	EGFR_113/rA1	AENSYA	experimental			GRB2
2589	EGFR_113/rA1	AENSYA	experimental			GRB2
3096	EGFR_113/rA1	AENSYA	experimental			GRB2
3133	EGFR_113/rA1	AENSYA	experimental			GRB2
3575	EGFR_113/rA1	AENSYA	experimental			GRB2
3826	EGFR_113/rA1	AENSYA	experimental			GRB2
391	EGFR_1138	yLNTVQ	experimental			GRB2,PLCG1,ABL2,PTPN11,RASA1
1084	EGFR_1138	yLNTVQ	experimental			GRB2,PLCG1,ABL2,PTPN11,RASA1
1121	EGFR_1138	yLNTVQ	experimental			GRB2,PLCG1,ABL2,PTPN11,RASA1
1628	EGFR_1138	yLNTVQ	experimental			GRB2,PLCG1,ABL2,PTPN11,RASA1
1986	EGFR_1138	yLNTVQ	experimental			GRB2,PLCG1,ABL2,PTPN11,RASA1
2135	EGFR_1138	yLNTVQ	experimental			GRB2,PLCG1,ABL2,PTPN11,RASA1
2614	EGFR_1138	yLNTVQ	experimental			GRB2,PLCG1,ABL2,PTPN11,RASA1
2865	EGFR_1138	yLNTVQ	experimental			GRB2,PLCG1,ABL2,PTPN11,RASA1
3372	EGFR_1138	yLNTVQ	experimental			GRB2,PLCG1,ABL2,PTPN11,RASA1
3679	EGFR_1138	yLNTVQ	experimental			GRB2,PLCG1,ABL2,PTPN11,RASA1
3851	EGFR_1138	yLNTVQ	experimental			GRB2,PLCG1,ABL2,PTPN11,RASA1
422	EGFR_1138/rA1	ALNTVQ	experimental			GRB2,PLCG1,ABL2,PTPN11,RASA1
1115	EGFR_1138/rA1	ALNTVQ	experimental			GRB2,PLCG1,ABL2,PTPN11,RASA1
1152	EGFR_1138/rA1	ALNTVQ	experimental			GRB2,PLCG1,ABL2,PTPN11,RASA1
1659	EGFR_1138/rA1	ALNTVQ	experimental			GRB2,PLCG1,ABL2,PTPN11,RASA1
2017	EGFR_1138/rA1	ALNTVQ	experimental			GRB2,PLCG1,ABL2,PTPN11,RASA1
2166	EGFR_1138/rA1	ALNTVQ	experimental			GRB2,PLCG1,ABL2,PTPN11,RASA1
2645	EGFR_1138/rA1	ALNTVQ	experimental			GRB2,PLCG1,ABL2,PTPN11,RASA1
2896	EGFR_1138/rA1	ALNTVQ	experimental			GRB2,PLCG1,ABL2,PTPN11,RASA1
3403	EGFR_1138/rA1	ALNTVQ	experimental			GRB2,PLCG1,ABL2,PTPN11,RASA1
3710	EGFR_1138/rA1	ALNTVQ	experimental			GRB2,PLCG1,ABL2,PTPN11,RASA1
3882	EGFR_1138/rA1	ALNTVQ	experimental			GRB2,PLCG1,ABL2,PTPN11,RASA1
381	EPHA2_960	ySLLGL	experimental			PTPN11
888	EPHA2_960	ySLLGL	experimental			PTPN11
1139	EPHA2_960	ySLLGL	experimental			PTPN11
1618	EPHA2_960	ySLLGL	experimental			PTPN11
2125	EPHA2_960	ySLLGL	experimental			PTPN11
2632	EPHA2_960	ySLLGL	experimental			PTPN11
2855	EPHA2_960	ySLLGL	experimental			PTPN11
3362	EPHA2_960	ySLLGL	experimental			PTPN11
3669	EPHA2_960	ySLLGL	experimental			PTPN11
3869	EPHA2_960	ySLLGL	experimental			PTPN11
412	EPHA2_960/rA1	ASLLGL	experimental			PTPN11
919	EPHA2_960/rA1	ASLLGL	experimental			PTPN11
1170	EPHA2_960/rA1	ASLLGL	experimental			PTPN11
1649	EPHA2_960/rA1	ASLLGL	experimental			PTPN11
2156	EPHA2_960/rA1	ASLLGL	experimental			PTPN11
2663	EPHA2_960/rA1	ASLLGL	experimental			PTPN11
2886	EPHA2_960/rA1	ASLLGL	experimental			PTPN11
3393	EPHA2_960/rA1	ASLLGL	experimental			PTPN11
3700	EPHA2_960/rA1	ASLLGL	experimental			PTPN11
3900	EPHA2_960/rA1	ASLLGL	experimental			PTPN11
258	EPOR_454	yLYLVV	experimental			SYK,STAT5A,CISH,SOCS3,PTPN6
509	EPOR_454	yLYLVV	experimental			SYK,STAT5A,CISH,SOCS3,PTPN6
951	EPOR_454	yLYLVV	experimental			SYK,STAT5A,CISH,SOCS3,PTPN6
1016	EPOR_454	yLYLVV	experimental			SYK,STAT5A,CISH,SOCS3,PTPN6
1495	EPOR_454	yLYLVV	experimental			SYK,STAT5A,CISH,SOCS3,PTPN6
2002	EPOR_454	yLYLVV	experimental			SYK,STAT5A,CISH,SOCS3,PTPN6
2509	EPOR_454	yLYLVV	experimental			SYK,STAT5A,CISH,SOCS3,PTPN6
2732	EPOR_454	yLYLVV	experimental			SYK,STAT5A,CISH,SOCS3,PTPN6
3039	EPOR_454	yLYLVV	experimental			SYK,STAT5A,CISH,SOCS3,PTPN6
3239	EPOR_454	yLYLVV	experimental			SYK,STAT5A,CISH,SOCS3,PTPN6
3746	EPOR_454	yLYLVV	experimental			SYK,STAT5A,CISH,SOCS3,PTPN6
289	EPOR_454/rA1	ALYLVV	experimental			SYK,STAT5A,CISH,SOCS3,PTPN6
540	EPOR_454/rA1	ALYLVV	experimental			SYK,STAT5A,CISH,SOCS3,PTPN6
982	EPOR_454/rA1	ALYLVV	experimental			SYK,STAT5A,CISH,SOCS3,PTPN6
1047	EPOR_454/rA1	ALYLVV	experimental			SYK,STAT5A,CISH,SOCS3,PTPN6
1526	EPOR_454/rA1	ALYLVV	experimental			SYK,STAT5A,CISH,SOCS3,PTPN6
2033	EPOR_454/rA1	ALYLVV	experimental			SYK,STAT5A,CISH,SOCS3,PTPN6
2540	EPOR_454/rA1	ALYLVV	experimental			SYK,STAT5A,CISH,SOCS3,PTPN6
2763	EPOR_454/rA1	ALYLVV	experimental			SYK,STAT5A,CISH,SOCS3,PTPN6
3070	EPOR_454/rA1	ALYLVV	experimental			SYK,STAT5A,CISH,SOCS3,PTPN6
3270	EPOR_454/rA1	ALYLVV	experimental			SYK,STAT5A,CISH,SOCS3,PTPN6
3777	EPOR_454/rA1	ALYLVV	experimental			SYK,STAT5A,CISH,SOCS3,PTPN6
462	EPOR_489	yENSLI	experimental			LYN,SH3BP2
685	EPOR_489	yENSLI	experimental			LYN,SH3BP2
1127	EPOR_489	yENSLI	experimental			LYN,SH3BP2
1192	EPOR_489	yENSLI	experimental			LYN,SH3BP2
1699	EPOR_489	yENSLI	experimental			LYN,SH3BP2
2178	EPOR_489	yENSLI	experimental			LYN,SH3BP2
2564	EPOR_489	yENSLI	experimental			LYN,SH3BP2
2685	EPOR_489	yENSLI	experimental			LYN,SH3BP2
3415	EPOR_489	yENSLI	experimental			LYN,SH3BP2
3750	EPOR_489	yENSLI	experimental			LYN,SH3BP2
3922	EPOR_489	yENSLI	experimental			LYN,SH3BP2
493	EPOR_489/rA1	AENSLI	experimental			LYN,SH3BP2
716	EPOR_489/rA1	AENSLI	experimental			LYN,SH3BP2
1158	EPOR_489/rA1	AENSLI	experimental			LYN,SH3BP2
1223	EPOR_489/rA1	AENSLI	experimental			LYN,SH3BP2
1730	EPOR_489/rA1	AENSLI	experimental			LYN,SH3BP2
2209	EPOR_489/rA1	AENSLI	experimental			LYN,SH3BP2
2595	EPOR_489/rA1	AENSLI	experimental			LYN,SH3BP2
2716	EPOR_489/rA1	AENSLI	experimental			LYN,SH3BP2
3446	EPOR_489/rA1	AENSLI	experimental			LYN,SH3BP2
3781	EPOR_489/rA1	AENSLI	experimental			LYN,SH3BP2
3953	EPOR_489/rA1	AENSLI	experimental			LYN,SH3BP2
75	ERBB3_1197	yEYMNR	experimental			SHC1,SYK,GRB7,TENC1,PIK3R3,PIK3R2,PIK3R1,RASA1
517	ERBB3_1197	yEYMNR	experimental			SHC1,SYK,GRB7,TENC1,PIK3R3,PIK3R2,PIK3R1,RASA1
582	ERBB3_1197	yEYMNR	experimental			SHC1,SYK,GRB7,TENC1,PIK3R3,PIK3R2,PIK3R1,RASA1
1061	ERBB3_1197	yEYMNR	experimental			SHC1,SYK,GRB7,TENC1,PIK3R3,PIK3R2,PIK3R1,RASA1
1568	ERBB3_1197	yEYMNR	experimental			SHC1,SYK,GRB7,TENC1,PIK3R3,PIK3R2,PIK3R1,RASA1
2075	ERBB3_1197	yEYMNR	experimental			SHC1,SYK,GRB7,TENC1,PIK3R3,PIK3R2,PIK3R1,RASA1
2298	ERBB3_1197	yEYMNR	experimental			SHC1,SYK,GRB7,TENC1,PIK3R3,PIK3R2,PIK3R1,RASA1
2419	ERBB3_1197	yEYMNR	experimental			SHC1,SYK,GRB7,TENC1,PIK3R3,PIK3R2,PIK3R1,RASA1
2805	ERBB3_1197	yEYMNR	experimental			SHC1,SYK,GRB7,TENC1,PIK3R3,PIK3R2,PIK3R1,RASA1
3312	ERBB3_1197	yEYMNR	experimental			SHC1,SYK,GRB7,TENC1,PIK3R3,PIK3R2,PIK3R1,RASA1
3791	ERBB3_1197	yEYMNR	experimental			SHC1,SYK,GRB7,TENC1,PIK3R3,PIK3R2,PIK3R1,RASA1
106	ERBB3_1197/rA1	AEYMNR	experimental			SHC1,SYK,GRB7,TENC1,PIK3R3,PIK3R2,PIK3R1,RASA1
548	ERBB3_1197/rA1	AEYMNR	experimental			SHC1,SYK,GRB7,TENC1,PIK3R3,PIK3R2,PIK3R1,RASA1
613	ERBB3_1197/rA1	AEYMNR	experimental			SHC1,SYK,GRB7,TENC1,PIK3R3,PIK3R2,PIK3R1,RASA1
1092	ERBB3_1197/rA1	AEYMNR	experimental			SHC1,SYK,GRB7,TENC1,PIK3R3,PIK3R2,PIK3R1,RASA1
1599	ERBB3_1197/rA1	AEYMNR	experimental			SHC1,SYK,GRB7,TENC1,PIK3R3,PIK3R2,PIK3R1,RASA1
2106	ERBB3_1197/rA1	AEYMNR	experimental			SHC1,SYK,GRB7,TENC1,PIK3R3,PIK3R2,PIK3R1,RASA1
2329	ERBB3_1197/rA1	AEYMNR	experimental			SHC1,SYK,GRB7,TENC1,PIK3R3,PIK3R2,PIK3R1,RASA1
2450	ERBB3_1197/rA1	AEYMNR	experimental			SHC1,SYK,GRB7,TENC1,PIK3R3,PIK3R2,PIK3R1,RASA1
2836	ERBB3_1197/rA1	AEYMNR	experimental			SHC1,SYK,GRB7,TENC1,PIK3R3,PIK3R2,PIK3R1,RASA1
3343	ERBB3_1197/rA1	AEYMNR	experimental			SHC1,SYK,GRB7,TENC1,PIK3R3,PIK3R2,PIK3R1,RASA1
3822	ERBB3_1197/rA1	AEYMNR	experimental			SHC1,SYK,GRB7,TENC1,PIK3R3,PIK3R2,PIK3R1,RASA1
318	ETV6_314	yMNHIM	experimental			GRB2
518	ETV6_314	yMNHIM	experimental			GRB2
825	ETV6_314	yMNHIM	experimental			GRB2
1555	ETV6_314	yMNHIM	experimental			GRB2
1704	ETV6_314	yMNHIM	experimental			GRB2
2062	ETV6_314	yMNHIM	experimental			GRB2
2420	ETV6_314	yMNHIM	experimental			GRB2
2569	ETV6_314	yMNHIM	experimental			GRB2
3048	ETV6_314	yMNHIM	experimental			GRB2
3299	ETV6_314	yMNHIM	experimental			GRB2
3806	ETV6_314	yMNHIM	experimental			GRB2
349	ETV6_314/rA1	AMNHIM	experimental			GRB2
549	ETV6_314/rA1	AMNHIM	experimental			GRB2
856	ETV6_314/rA1	AMNHIM	experimental			GRB2
1586	ETV6_314/rA1	AMNHIM	experimental			GRB2
1735	ETV6_314/rA1	AMNHIM	experimental			GRB2
2093	ETV6_314/rA1	AMNHIM	experimental			GRB2
2451	ETV6_314/rA1	AMNHIM	experimental			GRB2
2600	ETV6_314/rA1	AMNHIM	experimental			GRB2
3079	ETV6_314/rA1	AMNHIM	experimental			GRB2
3330	ETV6_314/rA1	AMNHIM	experimental			GRB2
3837	ETV6_314/rA1	AMNHIM	experimental			GRB2
2573	F	F	LC Control			Custom Sequence
3348	F	F	LC Control			Custom Sequence
151	FAK1_925	yENVTG	experimental			SRC,STAT3,SHC1,GRB2,FES,SH3BP2
630	FAK1_925	yENVTG	experimental			SRC,STAT3,SHC1,GRB2,FES,SH3BP2
881	FAK1_925	yENVTG	experimental			SRC,STAT3,SHC1,GRB2,FES,SH3BP2
1388	FAK1_925	yENVTG	experimental			SRC,STAT3,SHC1,GRB2,FES,SH3BP2
1509	FAK1_925	yENVTG	experimental			SRC,STAT3,SHC1,GRB2,FES,SH3BP2
1867	FAK1_925	yENVTG	experimental			SRC,STAT3,SHC1,GRB2,FES,SH3BP2
2374	FAK1_925	yENVTG	experimental			SRC,STAT3,SHC1,GRB2,FES,SH3BP2
2881	FAK1_925	yENVTG	experimental			SRC,STAT3,SHC1,GRB2,FES,SH3BP2
3104	FAK1_925	yENVTG	experimental			SRC,STAT3,SHC1,GRB2,FES,SH3BP2
3411	FAK1_925	yENVTG	experimental			SRC,STAT3,SHC1,GRB2,FES,SH3BP2
3611	FAK1_925	yENVTG	experimental			SRC,STAT3,SHC1,GRB2,FES,SH3BP2
182	FAK1_925/rA1	AENVTG	experimental			SRC,STAT3,SHC1,GRB2,FES,SH3BP2
661	FAK1_925/rA1	AENVTG	experimental			SRC,STAT3,SHC1,GRB2,FES,SH3BP2
912	FAK1_925/rA1	AENVTG	experimental			SRC,STAT3,SHC1,GRB2,FES,SH3BP2
1419	FAK1_925/rA1	AENVTG	experimental			SRC,STAT3,SHC1,GRB2,FES,SH3BP2
1540	FAK1_925/rA1	AENVTG	experimental			SRC,STAT3,SHC1,GRB2,FES,SH3BP2
1898	FAK1_925/rA1	AENVTG	experimental			SRC,STAT3,SHC1,GRB2,FES,SH3BP2
2405	FAK1_925/rA1	AENVTG	experimental			SRC,STAT3,SHC1,GRB2,FES,SH3BP2
2912	FAK1_925/rA1	AENVTG	experimental			SRC,STAT3,SHC1,GRB2,FES,SH3BP2
3135	FAK1_925/rA1	AENVTG	experimental			SRC,STAT3,SHC1,GRB2,FES,SH3BP2
3442	FAK1_925/rA1	AENVTG	experimental			SRC,STAT3,SHC1,GRB2,FES,SH3BP2
3642	FAK1_925/rA1	AENVTG	experimental			SRC,STAT3,SHC1,GRB2,FES,SH3BP2
65	FCERB_219	yEELNI	experimental			SYK,LYN,FES,SHC1
507	FCERB_219	yEELNI	experimental			SYK,LYN,FES,SHC1
572	FCERB_219	yEELNI	experimental			SYK,LYN,FES,SHC1
1079	FCERB_219	yEELNI	experimental			SYK,LYN,FES,SHC1
1558	FCERB_219	yEELNI	experimental			SYK,LYN,FES,SHC1
1944	FCERB_219	yEELNI	experimental			SYK,LYN,FES,SHC1
2065	FCERB_219	yEELNI	experimental			SYK,LYN,FES,SHC1
2795	FCERB_219	yEELNI	experimental			SYK,LYN,FES,SHC1
3130	FCERB_219	yEELNI	experimental			SYK,LYN,FES,SHC1
3302	FCERB_219	yEELNI	experimental			SYK,LYN,FES,SHC1
3809	FCERB_219	yEELNI	experimental			SYK,LYN,FES,SHC1
96	FCERB_219/rA1	AEELNI	experimental			SYK,LYN,FES,SHC1
538	FCERB_219/rA1	AEELNI	experimental			SYK,LYN,FES,SHC1
603	FCERB_219/rA1	AEELNI	experimental			SYK,LYN,FES,SHC1
1110	FCERB_219/rA1	AEELNI	experimental			SYK,LYN,FES,SHC1
1589	FCERB_219/rA1	AEELNI	experimental			SYK,LYN,FES,SHC1
1975	FCERB_219/rA1	AEELNI	experimental			SYK,LYN,FES,SHC1
2096	FCERB_219/rA1	AEELNI	experimental			SYK,LYN,FES,SHC1
2826	FCERB_219/rA1	AEELNI	experimental			SYK,LYN,FES,SHC1
3161	FCERB_219/rA1	AEELNI	experimental			SYK,LYN,FES,SHC1
3333	FCERB_219/rA1	AEELNI	experimental			SYK,LYN,FES,SHC1
3840	FCERB_219/rA1	AEELNI	experimental			SYK,LYN,FES,SHC1
23	FCGR2B_292	ySLLMH	experimental			INPP5D,SHC1,PTPN11,PIK3R1,LYN,PTPN6
502	FCGR2B_292	ySLLMH	experimental			INPP5D,SHC1,PTPN11,PIK3R1,LYN,PTPN6
1009	FCGR2B_292	ySLLMH	experimental			INPP5D,SHC1,PTPN11,PIK3R1,LYN,PTPN6
1209	FCGR2B_292	ySLLMH	experimental			INPP5D,SHC1,PTPN11,PIK3R1,LYN,PTPN6
1516	FCGR2B_292	ySLLMH	experimental			INPP5D,SHC1,PTPN11,PIK3R1,LYN,PTPN6
1739	FCGR2B_292	ySLLMH	experimental			INPP5D,SHC1,PTPN11,PIK3R1,LYN,PTPN6
2246	FCGR2B_292	ySLLMH	experimental			INPP5D,SHC1,PTPN11,PIK3R1,LYN,PTPN6
2367	FCGR2B_292	ySLLMH	experimental			INPP5D,SHC1,PTPN11,PIK3R1,LYN,PTPN6
2753	FCGR2B_292	ySLLMH	experimental			INPP5D,SHC1,PTPN11,PIK3R1,LYN,PTPN6
3232	FCGR2B_292	ySLLMH	experimental			INPP5D,SHC1,PTPN11,PIK3R1,LYN,PTPN6
3739	FCGR2B_292	ySLLMH	experimental			INPP5D,SHC1,PTPN11,PIK3R1,LYN,PTPN6
54	FCGR2B_292/rA1	ASLLMH	experimental			INPP5D,SHC1,PTPN11,PIK3R1,LYN,PTPN6
533	FCGR2B_292/rA1	ASLLMH	experimental			INPP5D,SHC1,PTPN11,PIK3R1,LYN,PTPN6
1040	FCGR2B_292/rA1	ASLLMH	experimental			INPP5D,SHC1,PTPN11,PIK3R1,LYN,PTPN6
1240	FCGR2B_292/rA1	ASLLMH	experimental			INPP5D,SHC1,PTPN11,PIK3R1,LYN,PTPN6
1547	FCGR2B_292/rA1	ASLLMH	experimental			INPP5D,SHC1,PTPN11,PIK3R1,LYN,PTPN6
1770	FCGR2B_292/rA1	ASLLMH	experimental			INPP5D,SHC1,PTPN11,PIK3R1,LYN,PTPN6
2277	FCGR2B_292/rA1	ASLLMH	experimental			INPP5D,SHC1,PTPN11,PIK3R1,LYN,PTPN6
2398	FCGR2B_292/rA1	ASLLMH	experimental			INPP5D,SHC1,PTPN11,PIK3R1,LYN,PTPN6
2784	FCGR2B_292/rA1	ASLLMH	experimental			INPP5D,SHC1,PTPN11,PIK3R1,LYN,PTPN6
3263	FCGR2B_292/rA1	ASLLMH	experimental			INPP5D,SHC1,PTPN11,PIK3R1,LYN,PTPN6
3770	FCGR2B_292/rA1	ASLLMH	experimental			INPP5D,SHC1,PTPN11,PIK3R1,LYN,PTPN6
152	FGFR2_561	yVIVEY	experimental			PLCG2,PLCG1,GRB2,PTPN11,SHC1
375	FGFR2_561	yVIVEY	experimental			PLCG2,PLCG1,GRB2,PTPN11,SHC1
817	FGFR2_561	yVIVEY	experimental			PLCG2,PLCG1,GRB2,PTPN11,SHC1
882	FGFR2_561	yVIVEY	experimental			PLCG2,PLCG1,GRB2,PTPN11,SHC1
1389	FGFR2_561	yVIVEY	experimental			PLCG2,PLCG1,GRB2,PTPN11,SHC1
1868	FGFR2_561	yVIVEY	experimental			PLCG2,PLCG1,GRB2,PTPN11,SHC1
2254	FGFR2_561	yVIVEY	experimental			PLCG2,PLCG1,GRB2,PTPN11,SHC1
2375	FGFR2_561	yVIVEY	experimental			PLCG2,PLCG1,GRB2,PTPN11,SHC1
3105	FGFR2_561	yVIVEY	experimental			PLCG2,PLCG1,GRB2,PTPN11,SHC1
3440	FGFR2_561	yVIVEY	experimental			PLCG2,PLCG1,GRB2,PTPN11,SHC1
3612	FGFR2_561	yVIVEY	experimental			PLCG2,PLCG1,GRB2,PTPN11,SHC1
183	FGFR2_561/rA1	AVIVEY	experimental			PLCG2,PLCG1,GRB2,PTPN11,SHC1
406	FGFR2_561/rA1	AVIVEY	experimental			PLCG2,PLCG1,GRB2,PTPN11,SHC1
848	FGFR2_561/rA1	AVIVEY	experimental			PLCG2,PLCG1,GRB2,PTPN11,SHC1
913	FGFR2_561/rA1	AVIVEY	experimental			PLCG2,PLCG1,GRB2,PTPN11,SHC1
1420	FGFR2_561/rA1	AVIVEY	experimental			PLCG2,PLCG1,GRB2,PTPN11,SHC1
1899	FGFR2_561/rA1	AVIVEY	experimental			PLCG2,PLCG1,GRB2,PTPN11,SHC1
2285	FGFR2_561/rA1	AVIVEY	experimental			PLCG2,PLCG1,GRB2,PTPN11,SHC1
2406	FGFR2_561/rA1	AVIVEY	experimental			PLCG2,PLCG1,GRB2,PTPN11,SHC1
3136	FGFR2_561/rA1	AVIVEY	experimental			PLCG2,PLCG1,GRB2,PTPN11,SHC1
3471	FGFR2_561/rA1	AVIVEY	experimental			PLCG2,PLCG1,GRB2,PTPN11,SHC1
3643	FGFR2_561/rA1	AVIVEY	experimental			PLCG2,PLCG1,GRB2,PTPN11,SHC1
91	FGFR3_552	yVLVEY	experimental			GRB2,SHC1
249	FGFR3_552	yVLVEY	experimental			GRB2,SHC1
314	FGFR3_552	yVLVEY	experimental			GRB2,SHC1
821	FGFR3_552	yVLVEY	experimental			GRB2,SHC1
1328	FGFR3_552	yVLVEY	experimental			GRB2,SHC1
1686	FGFR3_552	yVLVEY	experimental			GRB2,SHC1
1807	FGFR3_552	yVLVEY	experimental			GRB2,SHC1
2314	FGFR3_552	yVLVEY	experimental			GRB2,SHC1
2565	FGFR3_552	yVLVEY	experimental			GRB2,SHC1
3044	FGFR3_552	yVLVEY	experimental			GRB2,SHC1
3551	FGFR3_552	yVLVEY	experimental			GRB2,SHC1
122	FGFR3_552/rA1	AVLVEY	experimental			GRB2,SHC1
280	FGFR3_552/rA1	AVLVEY	experimental			GRB2,SHC1
345	FGFR3_552/rA1	AVLVEY	experimental			GRB2,SHC1
852	FGFR3_552/rA1	AVLVEY	experimental			GRB2,SHC1
1359	FGFR3_552/rA1	AVLVEY	experimental			GRB2,SHC1
1717	FGFR3_552/rA1	AVLVEY	experimental			GRB2,SHC1
1838	FGFR3_552/rA1	AVLVEY	experimental			GRB2,SHC1
2345	FGFR3_552/rA1	AVLVEY	experimental			GRB2,SHC1
2596	FGFR3_552/rA1	AVLVEY	experimental			GRB2,SHC1
3075	FGFR3_552/rA1	AVLVEY	experimental			GRB2,SHC1
3582	FGFR3_552/rA1	AVLVEY	experimental			GRB2,SHC1
461	FLT1_1213	yVNAFK	experimental			PTPN11,GRB2,NCK1,PIK3R1
940	FLT1_1213	yVNAFK	experimental			PTPN11,GRB2,NCK1,PIK3R1
1191	FLT1_1213	yVNAFK	experimental			PTPN11,GRB2,NCK1,PIK3R1
1698	FLT1_1213	yVNAFK	experimental			PTPN11,GRB2,NCK1,PIK3R1
1819	FLT1_1213	yVNAFK	experimental			PTPN11,GRB2,NCK1,PIK3R1
2177	FLT1_1213	yVNAFK	experimental			PTPN11,GRB2,NCK1,PIK3R1
2684	FLT1_1213	yVNAFK	experimental			PTPN11,GRB2,NCK1,PIK3R1
3191	FLT1_1213	yVNAFK	experimental			PTPN11,GRB2,NCK1,PIK3R1
3414	FLT1_1213	yVNAFK	experimental			PTPN11,GRB2,NCK1,PIK3R1
3721	FLT1_1213	yVNAFK	experimental			PTPN11,GRB2,NCK1,PIK3R1
3921	FLT1_1213	yVNAFK	experimental			PTPN11,GRB2,NCK1,PIK3R1
492	FLT1_1213/rA1	AVNAFK	experimental			PTPN11,GRB2,NCK1,PIK3R1
971	FLT1_1213/rA1	AVNAFK	experimental			PTPN11,GRB2,NCK1,PIK3R1
1222	FLT1_1213/rA1	AVNAFK	experimental			PTPN11,GRB2,NCK1,PIK3R1
1729	FLT1_1213/rA1	AVNAFK	experimental			PTPN11,GRB2,NCK1,PIK3R1
1850	FLT1_1213/rA1	AVNAFK	experimental			PTPN11,GRB2,NCK1,PIK3R1
2208	FLT1_1213/rA1	AVNAFK	experimental			PTPN11,GRB2,NCK1,PIK3R1
2715	FLT1_1213/rA1	AVNAFK	experimental			PTPN11,GRB2,NCK1,PIK3R1
3222	FLT1_1213/rA1	AVNAFK	experimental			PTPN11,GRB2,NCK1,PIK3R1
3445	FLT1_1213/rA1	AVNAFK	experimental			PTPN11,GRB2,NCK1,PIK3R1
3752	FLT1_1213/rA1	AVNAFK	experimental			PTPN11,GRB2,NCK1,PIK3R1
3952	FLT1_1213/rA1	AVNAFK	experimental			PTPN11,GRB2,NCK1,PIK3R1
256	FLT3_768	yENQKR	experimental			SH3BP2
456	FLT3_768	yENQKR	experimental			SH3BP2
763	FLT3_768	yENQKR	experimental			SH3BP2
1493	FLT3_768	yENQKR	experimental			SH3BP2
1642	FLT3_768	yENQKR	experimental			SH3BP2
2000	FLT3_768	yENQKR	experimental			SH3BP2
2358	FLT3_768	yENQKR	experimental			SH3BP2
2507	FLT3_768	yENQKR	experimental			SH3BP2
2986	FLT3_768	yENQKR	experimental			SH3BP2
3237	FLT3_768	yENQKR	experimental			SH3BP2
3744	FLT3_768	yENQKR	experimental			SH3BP2
287	FLT3_768/rA1	AENQKR	experimental			SH3BP2
487	FLT3_768/rA1	AENQKR	experimental			SH3BP2
794	FLT3_768/rA1	AENQKR	experimental			SH3BP2
1524	FLT3_768/rA1	AENQKR	experimental			SH3BP2
1673	FLT3_768/rA1	AENQKR	experimental			SH3BP2
2031	FLT3_768/rA1	AENQKR	experimental			SH3BP2
2389	FLT3_768/rA1	AENQKR	experimental			SH3BP2
2538	FLT3_768/rA1	AENQKR	experimental			SH3BP2
3017	FLT3_768/rA1	AENQKR	experimental			SH3BP2
3268	FLT3_768/rA1	AENQKR	experimental			SH3BP2
3775	FLT3_768/rA1	AENQKR	experimental			SH3BP2
388	FLT3_955	yQNVDG	experimental			GRB2
560	FLT3_955	yQNVDG	experimental			GRB2
895	FLT3_955	yQNVDG	experimental			GRB2
1374	FLT3_955	yQNVDG	experimental			GRB2
1625	FLT3_955	yQNVDG	experimental			GRB2
2132	FLT3_955	yQNVDG	experimental			GRB2
2253	FLT3_955	yQNVDG	experimental			GRB2
2611	FLT3_955	yQNVDG	experimental			GRB2
3118	FLT3_955	yQNVDG	experimental			GRB2
3625	FLT3_955	yQNVDG	experimental			GRB2
3848	FLT3_955	yQNVDG	experimental			GRB2
419	FLT3_955/rA1	AQNVDG	experimental			GRB2
591	FLT3_955/rA1	AQNVDG	experimental			GRB2
926	FLT3_955/rA1	AQNVDG	experimental			GRB2
1405	FLT3_955/rA1	AQNVDG	experimental			GRB2
1656	FLT3_955/rA1	AQNVDG	experimental			GRB2
2163	FLT3_955/rA1	AQNVDG	experimental			GRB2
2284	FLT3_955/rA1	AQNVDG	experimental			GRB2
2642	FLT3_955/rA1	AQNVDG	experimental			GRB2
3149	FLT3_955/rA1	AQNVDG	experimental			GRB2
3656	FLT3_955/rA1	AQNVDG	experimental			GRB2
3879	FLT3_955/rA1	AQNVDG	experimental			GRB2
273	FLT3_969	yQNRRP	experimental			GRB2
752	FLT3_969	yQNRRP	experimental			GRB2
952	FLT3_969	yQNRRP	experimental			GRB2
1259	FLT3_969	yQNRRP	experimental			GRB2
1989	FLT3_969	yQNRRP	experimental			GRB2
2138	FLT3_969	yQNRRP	experimental			GRB2
2496	FLT3_969	yQNRRP	experimental			GRB2
3003	FLT3_969	yQNRRP	experimental			GRB2
3040	FLT3_969	yQNRRP	experimental			GRB2
3482	FLT3_969	yQNRRP	experimental			GRB2
3733	FLT3_969	yQNRRP	experimental			GRB2
304	FLT3_969/rA1	AQNRRP	experimental			GRB2
783	FLT3_969/rA1	AQNRRP	experimental			GRB2
983	FLT3_969/rA1	AQNRRP	experimental			GRB2
1290	FLT3_969/rA1	AQNRRP	experimental			GRB2
2020	FLT3_969/rA1	AQNRRP	experimental			GRB2
2169	FLT3_969/rA1	AQNRRP	experimental			GRB2
2527	FLT3_969/rA1	AQNRRP	experimental			GRB2
3034	FLT3_969/rA1	AQNRRP	experimental			GRB2
3071	FLT3_969/rA1	AQNRRP	experimental			GRB2
3513	FLT3_969/rA1	AQNRRP	experimental			GRB2
3764	FLT3_969/rA1	AQNRRP	experimental			GRB2
650	FRS2_196	yVNTTG	experimental			GRB2
687	FRS2_196	yVNTTG	experimental			GRB2
1194	FRS2_196	yVNTTG	experimental			GRB2
1552	FRS2_196	yVNTTG	experimental			GRB2
1701	FRS2_196	yVNTTG	experimental			GRB2
2180	FRS2_196	yVNTTG	experimental			GRB2
2431	FRS2_196	yVNTTG	experimental			GRB2
2938	FRS2_196	yVNTTG	experimental			GRB2
3245	FRS2_196	yVNTTG	experimental			GRB2
3417	FRS2_196	yVNTTG	experimental			GRB2
3924	FRS2_196	yVNTTG	experimental			GRB2
681	FRS2_196/rA1	AVNTTG	experimental			GRB2
718	FRS2_196/rA1	AVNTTG	experimental			GRB2
1225	FRS2_196/rA1	AVNTTG	experimental			GRB2
1583	FRS2_196/rA1	AVNTTG	experimental			GRB2
1732	FRS2_196/rA1	AVNTTG	experimental			GRB2
2211	FRS2_196/rA1	AVNTTG	experimental			GRB2
2462	FRS2_196/rA1	AVNTTG	experimental			GRB2
2969	FRS2_196/rA1	AVNTTG	experimental			GRB2
3276	FRS2_196/rA1	AVNTTG	experimental			GRB2
3448	FRS2_196/rA1	AVNTTG	experimental			GRB2
3955	FRS2_196/rA1	AVNTTG	experimental			GRB2
214	FRS2_471	yAVIDI	experimental			PTPN11
437	FRS2_471	yAVIDI	experimental			PTPN11
879	FRS2_471	yAVIDI	experimental			PTPN11
944	FRS2_471	yAVIDI	experimental			PTPN11
1451	FRS2_471	yAVIDI	experimental			PTPN11
1930	FRS2_471	yAVIDI	experimental			PTPN11
2316	FRS2_471	yAVIDI	experimental			PTPN11
2437	FRS2_471	yAVIDI	experimental			PTPN11
3167	FRS2_471	yAVIDI	experimental			PTPN11
3502	FRS2_471	yAVIDI	experimental			PTPN11
3674	FRS2_471	yAVIDI	experimental			PTPN11
245	FRS2_471/rA1	AAVIDI	experimental			PTPN11
468	FRS2_471/rA1	AAVIDI	experimental			PTPN11
910	FRS2_471/rA1	AAVIDI	experimental			PTPN11
975	FRS2_471/rA1	AAVIDI	experimental			PTPN11
1482	FRS2_471/rA1	AAVIDI	experimental			PTPN11
1961	FRS2_471/rA1	AAVIDI	experimental			PTPN11
2347	FRS2_471/rA1	AAVIDI	experimental			PTPN11
2468	FRS2_471/rA1	AAVIDI	experimental			PTPN11
3198	FRS2_471/rA1	AAVIDI	experimental			PTPN11
3533	FRS2_471/rA1	AAVIDI	experimental			PTPN11
3705	FRS2_471/rA1	AAVIDI	experimental			PTPN11
141	FRS3_455	yAVIDL	experimental			PTPN11
341	FRS3_455	yAVIDL	experimental			PTPN11
648	FRS3_455	yAVIDL	experimental			PTPN11
871	FRS3_455	yAVIDL	experimental			PTPN11
1378	FRS3_455	yAVIDL	experimental			PTPN11
1499	FRS3_455	yAVIDL	experimental			PTPN11
1885	FRS3_455	yAVIDL	experimental			PTPN11
2364	FRS3_455	yAVIDL	experimental			PTPN11
2871	FRS3_455	yAVIDL	experimental			PTPN11
2936	FRS3_455	yAVIDL	experimental			PTPN11
3601	FRS3_455	yAVIDL	experimental			PTPN11
172	FRS3_455/rA1	AAVIDL	experimental			PTPN11
372	FRS3_455/rA1	AAVIDL	experimental			PTPN11
679	FRS3_455/rA1	AAVIDL	experimental			PTPN11
902	FRS3_455/rA1	AAVIDL	experimental			PTPN11
1409	FRS3_455/rA1	AAVIDL	experimental			PTPN11
1530	FRS3_455/rA1	AAVIDL	experimental			PTPN11
1916	FRS3_455/rA1	AAVIDL	experimental			PTPN11
2395	FRS3_455/rA1	AAVIDL	experimental			PTPN11
2902	FRS3_455/rA1	AAVIDL	experimental			PTPN11
2967	FRS3_455/rA1	AAVIDL	experimental			PTPN11
3632	FRS3_455/rA1	AAVIDL	experimental			PTPN11
72	FRYL_680	ySNVF	experimental			GRB7-SH2a
134	FRYL_680	ySNVF	experimental			GRB7-SH2a
323	FRYL_680	ySNVF	experimental			GRB7-SH2a
385	FRYL_680	ySNVF	experimental			GRB7-SH2a
765	FRYL_680	ySNVF	experimental			GRB7-SH2a
827	FRYL_680	ySNVF	experimental			GRB7-SH2a
830	FRYL_680	ySNVF	experimental			GRB7-SH2a
892	FRYL_680	ySNVF	experimental			GRB7-SH2a
1309	FRYL_680	ySNVF	experimental			GRB7-SH2a
1371	FRYL_680	ySNVF	experimental			GRB7-SH2a
1816	FRYL_680	ySNVF	experimental			GRB7-SH2a
1878	FRYL_680	ySNVF	experimental			GRB7-SH2a
2323	FRYL_680	ySNVF	experimental			GRB7-SH2a
2385	FRYL_680	ySNVF	experimental			GRB7-SH2a
2546	FRYL_680	ySNVF	experimental			GRB7-SH2a
2608	FRYL_680	ySNVF	experimental			GRB7-SH2a
2853	FRYL_680	ySNVF	experimental			GRB7-SH2a
2915	FRYL_680	ySNVF	experimental			GRB7-SH2a
3053	FRYL_680	ySNVF	experimental			GRB7-SH2a
3115	FRYL_680	ySNVF	experimental			GRB7-SH2a
3560	FRYL_680	ySNVF	experimental			GRB7-SH2a
3622	FRYL_680	ySNVF	experimental			GRB7-SH2a
103	FRYL_680/rA1	ASNVF	experimental			GRB7-SH2a
165	FRYL_680/rA1	ASNVF	experimental			GRB7-SH2a
354	FRYL_680/rA1	ASNVF	experimental			GRB7-SH2a
416	FRYL_680/rA1	ASNVF	experimental			GRB7-SH2a
796	FRYL_680/rA1	ASNVF	experimental			GRB7-SH2a
858	FRYL_680/rA1	ASNVF	experimental			GRB7-SH2a
861	FRYL_680/rA1	ASNVF	experimental			GRB7-SH2a
923	FRYL_680/rA1	ASNVF	experimental			GRB7-SH2a
1340	FRYL_680/rA1	ASNVF	experimental			GRB7-SH2a
1402	FRYL_680/rA1	ASNVF	experimental			GRB7-SH2a
1847	FRYL_680/rA1	ASNVF	experimental			GRB7-SH2a
1909	FRYL_680/rA1	ASNVF	experimental			GRB7-SH2a
2354	FRYL_680/rA1	ASNVF	experimental			GRB7-SH2a
2416	FRYL_680/rA1	ASNVF	experimental			GRB7-SH2a
2577	FRYL_680/rA1	ASNVF	experimental			GRB7-SH2a
2639	FRYL_680/rA1	ASNVF	experimental			GRB7-SH2a
2884	FRYL_680/rA1	ASNVF	experimental			GRB7-SH2a
2946	FRYL_680/rA1	ASNVF	experimental			GRB7-SH2a
3084	FRYL_680/rA1	ASNVF	experimental			GRB7-SH2a
3146	FRYL_680/rA1	ASNVF	experimental			GRB7-SH2a
3591	FRYL_680/rA1	ASNVF	experimental			GRB7-SH2a
3653	FRYL_680/rA1	ASNVF	experimental			GRB7-SH2a
2604	G	G	LC Control			Custom Sequence
3379	G	G	LC Control			Custom Sequence
378	GCET2_128	ySLLHM	experimental			PTPN6
885	GCET2_128	ySLLHM	experimental			PTPN6
1085	GCET2_128	ySLLHM	experimental			PTPN6
1392	GCET2_128	ySLLHM	experimental			PTPN6
1615	GCET2_128	ySLLHM	experimental			PTPN6
2122	GCET2_128	ySLLHM	experimental			PTPN6
2243	GCET2_128	ySLLHM	experimental			PTPN6
2629	GCET2_128	ySLLHM	experimental			PTPN6
3108	GCET2_128	ySLLHM	experimental			PTPN6
3615	GCET2_128	ySLLHM	experimental			PTPN6
3680	GCET2_128	ySLLHM	experimental			PTPN6
409	GCET2_128/rA1	ASLLHM	experimental			PTPN6
916	GCET2_128/rA1	ASLLHM	experimental			PTPN6
1116	GCET2_128/rA1	ASLLHM	experimental			PTPN6
1423	GCET2_128/rA1	ASLLHM	experimental			PTPN6
1646	GCET2_128/rA1	ASLLHM	experimental			PTPN6
2153	GCET2_128/rA1	ASLLHM	experimental			PTPN6
2274	GCET2_128/rA1	ASLLHM	experimental			PTPN6
2660	GCET2_128/rA1	ASLLHM	experimental			PTPN6
3139	GCET2_128/rA1	ASLLHM	experimental			PTPN6
3646	GCET2_128/rA1	ASLLHM	experimental			PTPN6
3711	GCET2_128/rA1	ASLLHM	experimental			PTPN6
452	GJA1_265	yAYFNG	experimental			SRC
959	GJA1_265	yAYFNG	experimental			SRC
1117	GJA1_265	yAYFNG	experimental			SRC
1182	GJA1_265	yAYFNG	experimental			SRC
1689	GJA1_265	yAYFNG	experimental			SRC
2196	GJA1_265	yAYFNG	experimental			SRC
2554	GJA1_265	yAYFNG	experimental			SRC
2675	GJA1_265	yAYFNG	experimental			SRC
3182	GJA1_265	yAYFNG	experimental			SRC
3433	GJA1_265	yAYFNG	experimental			SRC
3912	GJA1_265	yAYFNG	experimental			SRC
483	GJA1_265/rA1	AAYFNG	experimental			SRC
990	GJA1_265/rA1	AAYFNG	experimental			SRC
1148	GJA1_265/rA1	AAYFNG	experimental			SRC
1213	GJA1_265/rA1	AAYFNG	experimental			SRC
1720	GJA1_265/rA1	AAYFNG	experimental			SRC
2227	GJA1_265/rA1	AAYFNG	experimental			SRC
2585	GJA1_265/rA1	AAYFNG	experimental			SRC
2706	GJA1_265/rA1	AAYFNG	experimental			SRC
3213	GJA1_265/rA1	AAYFNG	experimental			SRC
3464	GJA1_265/rA1	AAYFNG	experimental			SRC
3943	GJA1_265/rA1	AAYFNG	experimental			SRC
77	gp60SU_498	ySHLSP	experimental			SYK
584	gp60SU_498	ySHLSP	experimental			SYK
756	gp60SU_498	ySHLSP	experimental			SYK
1063	gp60SU_498	ySHLSP	experimental			SYK
1570	gp60SU_498	ySHLSP	experimental			SYK
1821	gp60SU_498	ySHLSP	experimental			SYK
2300	gp60SU_498	ySHLSP	experimental			SYK
2807	gp60SU_498	ySHLSP	experimental			SYK
3314	gp60SU_498	ySHLSP	experimental			SYK
3537	gp60SU_498	ySHLSP	experimental			SYK
108	gp60SU_498/rA1	ASHLSP	experimental			SYK
615	gp60SU_498/rA1	ASHLSP	experimental			SYK
787	gp60SU_498/rA1	ASHLSP	experimental			SYK
1094	gp60SU_498/rA1	ASHLSP	experimental			SYK
1601	gp60SU_498/rA1	ASHLSP	experimental			SYK
1852	gp60SU_498/rA1	ASHLSP	experimental			SYK
2331	gp60SU_498/rA1	ASHLSP	experimental			SYK
2838	gp60SU_498/rA1	ASHLSP	experimental			SYK
3345	gp60SU_498/rA1	ASHLSP	experimental			SYK
3568	gp60SU_498/rA1	ASHLSP	experimental			SYK
90	GPR175_205	ySLVVI	experimental			PTPN11,PTPN6
313	GPR175_205	ySLVVI	experimental			PTPN11,PTPN6
755	GPR175_205	ySLVVI	experimental			PTPN11,PTPN6
820	GPR175_205	ySLVVI	experimental			PTPN11,PTPN6
1327	GPR175_205	ySLVVI	experimental			PTPN11,PTPN6
1806	GPR175_205	ySLVVI	experimental			PTPN11,PTPN6
2192	GPR175_205	ySLVVI	experimental			PTPN11,PTPN6
2313	GPR175_205	ySLVVI	experimental			PTPN11,PTPN6
3043	GPR175_205	ySLVVI	experimental			PTPN11,PTPN6
3378	GPR175_205	ySLVVI	experimental			PTPN11,PTPN6
3550	GPR175_205	ySLVVI	experimental			PTPN11,PTPN6
121	GPR175_205/rA1	ASLVVI	experimental			PTPN11,PTPN6
344	GPR175_205/rA1	ASLVVI	experimental			PTPN11,PTPN6
786	GPR175_205/rA1	ASLVVI	experimental			PTPN11,PTPN6
851	GPR175_205/rA1	ASLVVI	experimental			PTPN11,PTPN6
1358	GPR175_205/rA1	ASLVVI	experimental			PTPN11,PTPN6
1837	GPR175_205/rA1	ASLVVI	experimental			PTPN11,PTPN6
2223	GPR175_205/rA1	ASLVVI	experimental			PTPN11,PTPN6
2344	GPR175_205/rA1	ASLVVI	experimental			PTPN11,PTPN6
3074	GPR175_205/rA1	ASLVVI	experimental			PTPN11,PTPN6
3409	GPR175_205/rA1	ASLVVI	experimental			PTPN11,PTPN6
3581	GPR175_205/rA1	ASLVVI	experimental			PTPN11,PTPN6
2	Grb2_+	yKNLHL	LC Control			Custom Sequence
12	Grb2_+	yKNLHL	LC Control			Custom Sequence
22	Grb2_+	yKNLHL	LC Control			Custom Sequence
31	Grb2_+	yKNLHL	LC Control			Custom Sequence
1304	Grb2_+	yKNLHL	LC Control			Custom Sequence
1314	Grb2_+	yKNLHL	LC Control			Custom Sequence
1324	Grb2_+	yKNLHL	LC Control			Custom Sequence
1333	Grb2_+	yKNLHL	LC Control			Custom Sequence
2606	Grb2_+	yKNLHL	LC Control			Custom Sequence
2616	Grb2_+	yKNLHL	LC Control			Custom Sequence
2626	Grb2_+	yKNLHL	LC Control			Custom Sequence
2635	Grb2_+	yKNLHL	LC Control			Custom Sequence
3784	Grb2_+	yKNLHL	LC Control			Custom Sequence
3794	Grb2_+	yKNLHL	LC Control			Custom Sequence
3804	Grb2_+	yKNLHL	LC Control			Custom Sequence
3813	Grb2_+	yKNLHL	LC Control			Custom Sequence
33	Grb2_neg	YKNLHL	LC Control			Custom Sequence
43	Grb2_neg	YKNLHL	LC Control			Custom Sequence
53	Grb2_neg	YKNLHL	LC Control			Custom Sequence
62	Grb2_neg	YKNLHL	LC Control			Custom Sequence
1335	Grb2_neg	YKNLHL	LC Control			Custom Sequence
1345	Grb2_neg	YKNLHL	LC Control			Custom Sequence
1355	Grb2_neg	YKNLHL	LC Control			Custom Sequence
1364	Grb2_neg	YKNLHL	LC Control			Custom Sequence
2637	Grb2_neg	YKNLHL	LC Control			Custom Sequence
2647	Grb2_neg	YKNLHL	LC Control			Custom Sequence
2657	Grb2_neg	YKNLHL	LC Control			Custom Sequence
2666	Grb2_neg	YKNLHL	LC Control			Custom Sequence
3815	Grb2_neg	YKNLHL	LC Control			Custom Sequence
3825	Grb2_neg	YKNLHL	LC Control			Custom Sequence
3835	Grb2_neg	YKNLHL	LC Control			Custom Sequence
3844	Grb2_neg	YKNLHL	LC Control			Custom Sequence
206	GRM2_647	ySALLT	experimental			PTPN6
457	GRM2_647	ySALLT	experimental			PTPN6
936	GRM2_647	ySALLT	experimental			PTPN6
1443	GRM2_647	ySALLT	experimental			PTPN6
1829	GRM2_647	ySALLT	experimental			PTPN6
1950	GRM2_647	ySALLT	experimental			PTPN6
2173	GRM2_647	ySALLT	experimental			PTPN6
2680	GRM2_647	ySALLT	experimental			PTPN6
2987	GRM2_647	ySALLT	experimental			PTPN6
3187	GRM2_647	ySALLT	experimental			PTPN6
3666	GRM2_647	ySALLT	experimental			PTPN6
237	GRM2_647/rA1	ASALLT	experimental			PTPN6
488	GRM2_647/rA1	ASALLT	experimental			PTPN6
967	GRM2_647/rA1	ASALLT	experimental			PTPN6
1474	GRM2_647/rA1	ASALLT	experimental			PTPN6
1860	GRM2_647/rA1	ASALLT	experimental			PTPN6
1981	GRM2_647/rA1	ASALLT	experimental			PTPN6
2204	GRM2_647/rA1	ASALLT	experimental			PTPN6
2711	GRM2_647/rA1	ASALLT	experimental			PTPN6
3018	GRM2_647/rA1	ASALLT	experimental			PTPN6
3218	GRM2_647/rA1	ASALLT	experimental			PTPN6
3697	GRM2_647/rA1	ASALLT	experimental			PTPN6
268	GRM3_656	ySALLT	experimental			PTPN6
519	GRM3_656	ySALLT	experimental			PTPN6
998	GRM3_656	ySALLT	experimental			PTPN6
1505	GRM3_656	ySALLT	experimental			PTPN6
1891	GRM3_656	ySALLT	experimental			PTPN6
2012	GRM3_656	ySALLT	experimental			PTPN6
2235	GRM3_656	ySALLT	experimental			PTPN6
2742	GRM3_656	ySALLT	experimental			PTPN6
3049	GRM3_656	ySALLT	experimental			PTPN6
3249	GRM3_656	ySALLT	experimental			PTPN6
3728	GRM3_656	ySALLT	experimental			PTPN6
299	GRM3_656/rA1	ASALLT	experimental			PTPN6
550	GRM3_656/rA1	ASALLT	experimental			PTPN6
1029	GRM3_656/rA1	ASALLT	experimental			PTPN6
1536	GRM3_656/rA1	ASALLT	experimental			PTPN6
1922	GRM3_656/rA1	ASALLT	experimental			PTPN6
2043	GRM3_656/rA1	ASALLT	experimental			PTPN6
2266	GRM3_656/rA1	ASALLT	experimental			PTPN6
2773	GRM3_656/rA1	ASALLT	experimental			PTPN6
3080	GRM3_656/rA1	ASALLT	experimental			PTPN6
3280	GRM3_656/rA1	ASALLT	experimental			PTPN6
3759	GRM3_656/rA1	ASALLT	experimental			PTPN6
212	GRM4_667	yAALLT	experimental			PTPN6
384	GRM4_667	yAALLT	experimental			PTPN6
691	GRM4_667	yAALLT	experimental			PTPN6
1198	GRM4_667	yAALLT	experimental			PTPN6
1449	GRM4_667	yAALLT	experimental			PTPN6
1928	GRM4_667	yAALLT	experimental			PTPN6
2435	GRM4_667	yAALLT	experimental			PTPN6
2942	GRM4_667	yAALLT	experimental			PTPN6
3165	GRM4_667	yAALLT	experimental			PTPN6
3672	GRM4_667	yAALLT	experimental			PTPN6
243	GRM4_667/rA1	AAALLT	experimental			PTPN6
415	GRM4_667/rA1	AAALLT	experimental			PTPN6
722	GRM4_667/rA1	AAALLT	experimental			PTPN6
1229	GRM4_667/rA1	AAALLT	experimental			PTPN6
1480	GRM4_667/rA1	AAALLT	experimental			PTPN6
1959	GRM4_667/rA1	AAALLT	experimental			PTPN6
2466	GRM4_667/rA1	AAALLT	experimental			PTPN6
2973	GRM4_667/rA1	AAALLT	experimental			PTPN6
3196	GRM4_667/rA1	AAALLT	experimental			PTPN6
3703	GRM4_667/rA1	AAALLT	experimental			PTPN6
274	GRM7_670	yAALLT	experimental			PTPN6
446	GRM7_670	yAALLT	experimental			PTPN6
753	GRM7_670	yAALLT	experimental			PTPN6
1260	GRM7_670	yAALLT	experimental			PTPN6
1511	GRM7_670	yAALLT	experimental			PTPN6
1990	GRM7_670	yAALLT	experimental			PTPN6
2497	GRM7_670	yAALLT	experimental			PTPN6
3004	GRM7_670	yAALLT	experimental			PTPN6
3227	GRM7_670	yAALLT	experimental			PTPN6
3734	GRM7_670	yAALLT	experimental			PTPN6
305	GRM7_670/rA1	AAALLT	experimental			PTPN6
477	GRM7_670/rA1	AAALLT	experimental			PTPN6
784	GRM7_670/rA1	AAALLT	experimental			PTPN6
1291	GRM7_670/rA1	AAALLT	experimental			PTPN6
1542	GRM7_670/rA1	AAALLT	experimental			PTPN6
2021	GRM7_670/rA1	AAALLT	experimental			PTPN6
2528	GRM7_670/rA1	AAALLT	experimental			PTPN6
3035	GRM7_670/rA1	AAALLT	experimental			PTPN6
3258	GRM7_670/rA1	AAALLT	experimental			PTPN6
3765	GRM7_670/rA1	AAALLT	experimental			PTPN6
588	GSTP1_199	yVNLPI	experimental			GRB2
625	GSTP1_199	yVNLPI	experimental			GRB2
1132	GSTP1_199	yVNLPI	experimental			GRB2
1490	GSTP1_199	yVNLPI	experimental			GRB2
1639	GSTP1_199	yVNLPI	experimental			GRB2
2118	GSTP1_199	yVNLPI	experimental			GRB2
2369	GSTP1_199	yVNLPI	experimental			GRB2
2876	GSTP1_199	yVNLPI	experimental			GRB2
3183	GSTP1_199	yVNLPI	experimental			GRB2
3355	GSTP1_199	yVNLPI	experimental			GRB2
3862	GSTP1_199	yVNLPI	experimental			GRB2
619	GSTP1_199/rA1	AVNLPI	experimental			GRB2
656	GSTP1_199/rA1	AVNLPI	experimental			GRB2
1163	GSTP1_199/rA1	AVNLPI	experimental			GRB2
1521	GSTP1_199/rA1	AVNLPI	experimental			GRB2
1670	GSTP1_199/rA1	AVNLPI	experimental			GRB2
2149	GSTP1_199/rA1	AVNLPI	experimental			GRB2
2400	GSTP1_199/rA1	AVNLPI	experimental			GRB2
2907	GSTP1_199/rA1	AVNLPI	experimental			GRB2
3214	GSTP1_199/rA1	AVNLPI	experimental			GRB2
3386	GSTP1_199/rA1	AVNLPI	experimental			GRB2
3893	GSTP1_199/rA1	AVNLPI	experimental			GRB2
2821	H	H	LC Control			Custom Sequence
3410	H	H	LC Control			Custom Sequence
94	HA_+	YPYDVPDYA	LC Control			Custom Sequence
104	HA_+	YPYDVPDYA	LC Control			Custom Sequence
114	HA_+	YPYDVPDYA	LC Control			Custom Sequence
123	HA_+	YPYDVPDYA	LC Control			Custom Sequence
1396	HA_+	YPYDVPDYA	LC Control			Custom Sequence
1406	HA_+	YPYDVPDYA	LC Control			Custom Sequence
1416	HA_+	YPYDVPDYA	LC Control			Custom Sequence
1425	HA_+	YPYDVPDYA	LC Control			Custom Sequence
2698	HA_+	YPYDVPDYA	LC Control			Custom Sequence
2708	HA_+	YPYDVPDYA	LC Control			Custom Sequence
2718	HA_+	YPYDVPDYA	LC Control			Custom Sequence
2727	HA_+	YPYDVPDYA	LC Control			Custom Sequence
3876	HA_+	YPYDVPDYA	LC Control			Custom Sequence
3886	HA_+	YPYDVPDYA	LC Control			Custom Sequence
3896	HA_+	YPYDVPDYA	LC Control			Custom Sequence
3905	HA_+	YPYDVPDYA	LC Control			Custom Sequence
201	HEXB_277	yARLRG	experimental			PTPN11,PTPN6
708	HEXB_277	yARLRG	experimental			PTPN11,PTPN6
880	HEXB_277	yARLRG	experimental			PTPN11,PTPN6
1187	HEXB_277	yARLRG	experimental			PTPN11,PTPN6
1694	HEXB_277	yARLRG	experimental			PTPN11,PTPN6
1945	HEXB_277	yARLRG	experimental			PTPN11,PTPN6
2424	HEXB_277	yARLRG	experimental			PTPN11,PTPN6
2931	HEXB_277	yARLRG	experimental			PTPN11,PTPN6
3438	HEXB_277	yARLRG	experimental			PTPN11,PTPN6
3661	HEXB_277	yARLRG	experimental			PTPN11,PTPN6
232	HEXB_277/rA1	AARLRG	experimental			PTPN11,PTPN6
739	HEXB_277/rA1	AARLRG	experimental			PTPN11,PTPN6
911	HEXB_277/rA1	AARLRG	experimental			PTPN11,PTPN6
1218	HEXB_277/rA1	AARLRG	experimental			PTPN11,PTPN6
1725	HEXB_277/rA1	AARLRG	experimental			PTPN11,PTPN6
1976	HEXB_277/rA1	AARLRG	experimental			PTPN11,PTPN6
2455	HEXB_277/rA1	AARLRG	experimental			PTPN11,PTPN6
2962	HEXB_277/rA1	AARLRG	experimental			PTPN11,PTPN6
3469	HEXB_277/rA1	AARLRG	experimental			PTPN11,PTPN6
3692	HEXB_277/rA1	AARLRG	experimental			PTPN11,PTPN6
454	HEXB_330	ySFLTT	experimental			PTPN11,PTPN6
705	HEXB_330	ySFLTT	experimental			PTPN11,PTPN6
1184	HEXB_330	ySFLTT	experimental			PTPN11,PTPN6
1691	HEXB_330	ySFLTT	experimental			PTPN11,PTPN6
2077	HEXB_330	ySFLTT	experimental			PTPN11,PTPN6
2198	HEXB_330	ySFLTT	experimental			PTPN11,PTPN6
2421	HEXB_330	ySFLTT	experimental			PTPN11,PTPN6
2928	HEXB_330	ySFLTT	experimental			PTPN11,PTPN6
3235	HEXB_330	ySFLTT	experimental			PTPN11,PTPN6
3435	HEXB_330	ySFLTT	experimental			PTPN11,PTPN6
3914	HEXB_330	ySFLTT	experimental			PTPN11,PTPN6
485	HEXB_330/rA1	ASFLTT	experimental			PTPN11,PTPN6
736	HEXB_330/rA1	ASFLTT	experimental			PTPN11,PTPN6
1215	HEXB_330/rA1	ASFLTT	experimental			PTPN11,PTPN6
1722	HEXB_330/rA1	ASFLTT	experimental			PTPN11,PTPN6
2108	HEXB_330/rA1	ASFLTT	experimental			PTPN11,PTPN6
2229	HEXB_330/rA1	ASFLTT	experimental			PTPN11,PTPN6
2452	HEXB_330/rA1	ASFLTT	experimental			PTPN11,PTPN6
2959	HEXB_330/rA1	ASFLTT	experimental			PTPN11,PTPN6
3266	HEXB_330/rA1	ASFLTT	experimental			PTPN11,PTPN6
3466	HEXB_330/rA1	ASFLTT	experimental			PTPN11,PTPN6
3945	HEXB_330/rA1	ASFLTT	experimental			PTPN11,PTPN6
2852	I	I	LC Control			Custom Sequence
3441	I	I	LC Control			Custom Sequence
18	IFNAR1_466	yVFFPS	experimental			TYK2,STAT3,STAT2,STAT1
525	IFNAR1_466	yVFFPS	experimental			TYK2,STAT3,STAT2,STAT1
683	IFNAR1_466	yVFFPS	experimental			TYK2,STAT3,STAT2,STAT1
748	IFNAR1_466	yVFFPS	experimental			TYK2,STAT3,STAT2,STAT1
1255	IFNAR1_466	yVFFPS	experimental			TYK2,STAT3,STAT2,STAT1
1762	IFNAR1_466	yVFFPS	experimental			TYK2,STAT3,STAT2,STAT1
2120	IFNAR1_466	yVFFPS	experimental			TYK2,STAT3,STAT2,STAT1
2241	IFNAR1_466	yVFFPS	experimental			TYK2,STAT3,STAT2,STAT1
2748	IFNAR1_466	yVFFPS	experimental			TYK2,STAT3,STAT2,STAT1
2999	IFNAR1_466	yVFFPS	experimental			TYK2,STAT3,STAT2,STAT1
3478	IFNAR1_466	yVFFPS	experimental			TYK2,STAT3,STAT2,STAT1
49	IFNAR1_466/rA1	AVFFPS	experimental			TYK2,STAT3,STAT2,STAT1
556	IFNAR1_466/rA1	AVFFPS	experimental			TYK2,STAT3,STAT2,STAT1
714	IFNAR1_466/rA1	AVFFPS	experimental			TYK2,STAT3,STAT2,STAT1
779	IFNAR1_466/rA1	AVFFPS	experimental			TYK2,STAT3,STAT2,STAT1
1286	IFNAR1_466/rA1	AVFFPS	experimental			TYK2,STAT3,STAT2,STAT1
1793	IFNAR1_466/rA1	AVFFPS	experimental			TYK2,STAT3,STAT2,STAT1
2151	IFNAR1_466/rA1	AVFFPS	experimental			TYK2,STAT3,STAT2,STAT1
2272	IFNAR1_466/rA1	AVFFPS	experimental			TYK2,STAT3,STAT2,STAT1
2779	IFNAR1_466/rA1	AVFFPS	experimental			TYK2,STAT3,STAT2,STAT1
3030	IFNAR1_466/rA1	AVFFPS	experimental			TYK2,STAT3,STAT2,STAT1
3509	IFNAR1_466/rA1	AVFFPS	experimental			TYK2,STAT3,STAT2,STAT1
205	IL1RL1_99	yANVTI	experimental			GRB2,MATK
898	IL1RL1_99	yANVTI	experimental			GRB2,MATK
935	IL1RL1_99	yANVTI	experimental			GRB2,MATK
1442	IL1RL1_99	yANVTI	experimental			GRB2,MATK
1800	IL1RL1_99	yANVTI	experimental			GRB2,MATK
1949	IL1RL1_99	yANVTI	experimental			GRB2,MATK
2428	IL1RL1_99	yANVTI	experimental			GRB2,MATK
2679	IL1RL1_99	yANVTI	experimental			GRB2,MATK
3186	IL1RL1_99	yANVTI	experimental			GRB2,MATK
3493	IL1RL1_99	yANVTI	experimental			GRB2,MATK
3665	IL1RL1_99	yANVTI	experimental			GRB2,MATK
236	IL1RL1_99/rA1	AANVTI	experimental			GRB2,MATK
929	IL1RL1_99/rA1	AANVTI	experimental			GRB2,MATK
966	IL1RL1_99/rA1	AANVTI	experimental			GRB2,MATK
1473	IL1RL1_99/rA1	AANVTI	experimental			GRB2,MATK
1831	IL1RL1_99/rA1	AANVTI	experimental			GRB2,MATK
1980	IL1RL1_99/rA1	AANVTI	experimental			GRB2,MATK
2459	IL1RL1_99/rA1	AANVTI	experimental			GRB2,MATK
2710	IL1RL1_99/rA1	AANVTI	experimental			GRB2,MATK
3217	IL1RL1_99/rA1	AANVTI	experimental			GRB2,MATK
3524	IL1RL1_99/rA1	AANVTI	experimental			GRB2,MATK
3696	IL1RL1_99/rA1	AANVTI	experimental			GRB2,MATK
320	IL2RB_364	yFFFHL	experimental			PTPN6
571	IL2RB_364	yFFFHL	experimental			PTPN6
1013	IL2RB_364	yFFFHL	experimental			PTPN6
1078	IL2RB_364	yFFFHL	experimental			PTPN6
1557	IL2RB_364	yFFFHL	experimental			PTPN6
2064	IL2RB_364	yFFFHL	experimental			PTPN6
2571	IL2RB_364	yFFFHL	experimental			PTPN6
2794	IL2RB_364	yFFFHL	experimental			PTPN6
3101	IL2RB_364	yFFFHL	experimental			PTPN6
3301	IL2RB_364	yFFFHL	experimental			PTPN6
3808	IL2RB_364	yFFFHL	experimental			PTPN6
351	IL2RB_364/rA1	AFFFHL	experimental			PTPN6
602	IL2RB_364/rA1	AFFFHL	experimental			PTPN6
1044	IL2RB_364/rA1	AFFFHL	experimental			PTPN6
1109	IL2RB_364/rA1	AFFFHL	experimental			PTPN6
1588	IL2RB_364/rA1	AFFFHL	experimental			PTPN6
2095	IL2RB_364/rA1	AFFFHL	experimental			PTPN6
2602	IL2RB_364/rA1	AFFFHL	experimental			PTPN6
2825	IL2RB_364/rA1	AFFFHL	experimental			PTPN6
3132	IL2RB_364/rA1	AFFFHL	experimental			PTPN6
3332	IL2RB_364/rA1	AFFFHL	experimental			PTPN6
3839	IL2RB_364/rA1	AFFFHL	experimental			PTPN6
69	IL2RB_381	yFTYDP	experimental			PTPN6
576	IL2RB_381	yFTYDP	experimental			PTPN6
1083	IL2RB_381	yFTYDP	experimental			PTPN6
1241	IL2RB_381	yFTYDP	experimental			PTPN6
1306	IL2RB_381	yFTYDP	experimental			PTPN6
1813	IL2RB_381	yFTYDP	experimental			PTPN6
2320	IL2RB_381	yFTYDP	experimental			PTPN6
2799	IL2RB_381	yFTYDP	experimental			PTPN6
2864	IL2RB_381	yFTYDP	experimental			PTPN6
3306	IL2RB_381	yFTYDP	experimental			PTPN6
3557	IL2RB_381	yFTYDP	experimental			PTPN6
100	IL2RB_381/rA1	AFTYDP	experimental			PTPN6
607	IL2RB_381/rA1	AFTYDP	experimental			PTPN6
1114	IL2RB_381/rA1	AFTYDP	experimental			PTPN6
1272	IL2RB_381/rA1	AFTYDP	experimental			PTPN6
1337	IL2RB_381/rA1	AFTYDP	experimental			PTPN6
1844	IL2RB_381/rA1	AFTYDP	experimental			PTPN6
2351	IL2RB_381/rA1	AFTYDP	experimental			PTPN6
2830	IL2RB_381/rA1	AFTYDP	experimental			PTPN6
2895	IL2RB_381/rA1	AFTYDP	experimental			PTPN6
3337	IL2RB_381/rA1	AFTYDP	experimental			PTPN6
3588	IL2RB_381/rA1	AFTYDP	experimental			PTPN6
190	IL4R_497	yRSFSN	experimental			IRS1
697	IL4R_497	yRSFSN	experimental			IRS1
1204	IL4R_497	yRSFSN	experimental			IRS1
1562	IL4R_497	yRSFSN	experimental			IRS1
1683	IL4R_497	yRSFSN	experimental			IRS1
2190	IL4R_497	yRSFSN	experimental			IRS1
2441	IL4R_497	yRSFSN	experimental			IRS1
2920	IL4R_497	yRSFSN	experimental			IRS1
3427	IL4R_497	yRSFSN	experimental			IRS1
3934	IL4R_497	yRSFSN	experimental			IRS1
221	IL4R_497/rA1	ARSFSN	experimental			IRS1
728	IL4R_497/rA1	ARSFSN	experimental			IRS1
1235	IL4R_497/rA1	ARSFSN	experimental			IRS1
1593	IL4R_497/rA1	ARSFSN	experimental			IRS1
1714	IL4R_497/rA1	ARSFSN	experimental			IRS1
2221	IL4R_497/rA1	ARSFSN	experimental			IRS1
2472	IL4R_497/rA1	ARSFSN	experimental			IRS1
2951	IL4R_497/rA1	ARSFSN	experimental			IRS1
3458	IL4R_497/rA1	ARSFSN	experimental			IRS1
3965	IL4R_497/rA1	ARSFSN	experimental			IRS1
85	IL4R_713	ySALTC	experimental			PTPN11,INPP5D,PTPN6,SHC1
564	IL4R_713	ySALTC	experimental			PTPN11,INPP5D,PTPN6,SHC1
1071	IL4R_713	ySALTC	experimental			PTPN11,INPP5D,PTPN6,SHC1
1271	IL4R_713	ySALTC	experimental			PTPN11,INPP5D,PTPN6,SHC1
1578	IL4R_713	ySALTC	experimental			PTPN11,INPP5D,PTPN6,SHC1
1801	IL4R_713	ySALTC	experimental			PTPN11,INPP5D,PTPN6,SHC1
2308	IL4R_713	ySALTC	experimental			PTPN11,INPP5D,PTPN6,SHC1
2429	IL4R_713	ySALTC	experimental			PTPN11,INPP5D,PTPN6,SHC1
2815	IL4R_713	ySALTC	experimental			PTPN11,INPP5D,PTPN6,SHC1
3294	IL4R_713	ySALTC	experimental			PTPN11,INPP5D,PTPN6,SHC1
3801	IL4R_713	ySALTC	experimental			PTPN11,INPP5D,PTPN6,SHC1
116	IL4R_713/rA1	ASALTC	experimental			PTPN11,INPP5D,PTPN6,SHC1
595	IL4R_713/rA1	ASALTC	experimental			PTPN11,INPP5D,PTPN6,SHC1
1102	IL4R_713/rA1	ASALTC	experimental			PTPN11,INPP5D,PTPN6,SHC1
1302	IL4R_713/rA1	ASALTC	experimental			PTPN11,INPP5D,PTPN6,SHC1
1609	IL4R_713/rA1	ASALTC	experimental			PTPN11,INPP5D,PTPN6,SHC1
1832	IL4R_713/rA1	ASALTC	experimental			PTPN11,INPP5D,PTPN6,SHC1
2339	IL4R_713/rA1	ASALTC	experimental			PTPN11,INPP5D,PTPN6,SHC1
2460	IL4R_713/rA1	ASALTC	experimental			PTPN11,INPP5D,PTPN6,SHC1
2846	IL4R_713/rA1	ASALTC	experimental			PTPN11,INPP5D,PTPN6,SHC1
3325	IL4R_713/rA1	ASALTC	experimental			PTPN11,INPP5D,PTPN6,SHC1
3832	IL4R_713/rA1	ASALTC	experimental			PTPN11,INPP5D,PTPN6,SHC1
199	IL6R_464	yFFPR	experimental			PTPN6
641	IL6R_464	yFFPR	experimental			PTPN6
706	IL6R_464	yFFPR	experimental			PTPN6
1185	IL6R_464	yFFPR	experimental			PTPN6
1692	IL6R_464	yFFPR	experimental			PTPN6
2199	IL6R_464	yFFPR	experimental			PTPN6
2422	IL6R_464	yFFPR	experimental			PTPN6
2543	IL6R_464	yFFPR	experimental			PTPN6
2929	IL6R_464	yFFPR	experimental			PTPN6
3436	IL6R_464	yFFPR	experimental			PTPN6
3915	IL6R_464	yFFPR	experimental			PTPN6
230	IL6R_464/rA1	AFFPR	experimental			PTPN6
672	IL6R_464/rA1	AFFPR	experimental			PTPN6
737	IL6R_464/rA1	AFFPR	experimental			PTPN6
1216	IL6R_464/rA1	AFFPR	experimental			PTPN6
1723	IL6R_464/rA1	AFFPR	experimental			PTPN6
2230	IL6R_464/rA1	AFFPR	experimental			PTPN6
2453	IL6R_464/rA1	AFFPR	experimental			PTPN6
2574	IL6R_464/rA1	AFFPR	experimental			PTPN6
2960	IL6R_464/rA1	AFFPR	experimental			PTPN6
3467	IL6R_464/rA1	AFFPR	experimental			PTPN6
3946	IL6R_464/rA1	AFFPR	experimental			PTPN6
321	IL8RA_46	yALVFL	experimental			PTPN6
386	IL8RA_46	yALVFL	experimental			PTPN6
893	IL8RA_46	yALVFL	experimental			PTPN6
1372	IL8RA_46	yALVFL	experimental			PTPN6
1758	IL8RA_46	yALVFL	experimental			PTPN6
1879	IL8RA_46	yALVFL	experimental			PTPN6
2609	IL8RA_46	yALVFL	experimental			PTPN6
2944	IL8RA_46	yALVFL	experimental			PTPN6
3116	IL8RA_46	yALVFL	experimental			PTPN6
3623	IL8RA_46	yALVFL	experimental			PTPN6
3660	IL8RA_46	yALVFL	experimental			PTPN6
352	IL8RA_46/rA1	AALVFL	experimental			PTPN6
417	IL8RA_46/rA1	AALVFL	experimental			PTPN6
924	IL8RA_46/rA1	AALVFL	experimental			PTPN6
1403	IL8RA_46/rA1	AALVFL	experimental			PTPN6
1789	IL8RA_46/rA1	AALVFL	experimental			PTPN6
1910	IL8RA_46/rA1	AALVFL	experimental			PTPN6
2640	IL8RA_46/rA1	AALVFL	experimental			PTPN6
2975	IL8RA_46/rA1	AALVFL	experimental			PTPN6
3147	IL8RA_46/rA1	AALVFL	experimental			PTPN6
3654	IL8RA_46/rA1	AALVFL	experimental			PTPN6
3691	IL8RA_46/rA1	AALVFL	experimental			PTPN6
383	IL8RB_55	yALVFL	experimental			PTPN6
448	IL8RB_55	yALVFL	experimental			PTPN6
955	IL8RB_55	yALVFL	experimental			PTPN6
1434	IL8RB_55	yALVFL	experimental			PTPN6
1820	IL8RB_55	yALVFL	experimental			PTPN6
1941	IL8RB_55	yALVFL	experimental			PTPN6
2671	IL8RB_55	yALVFL	experimental			PTPN6
3006	IL8RB_55	yALVFL	experimental			PTPN6
3178	IL8RB_55	yALVFL	experimental			PTPN6
3685	IL8RB_55	yALVFL	experimental			PTPN6
3722	IL8RB_55	yALVFL	experimental			PTPN6
414	IL8RB_55/rA1	AALVFL	experimental			PTPN6
479	IL8RB_55/rA1	AALVFL	experimental			PTPN6
986	IL8RB_55/rA1	AALVFL	experimental			PTPN6
1465	IL8RB_55/rA1	AALVFL	experimental			PTPN6
1851	IL8RB_55/rA1	AALVFL	experimental			PTPN6
1972	IL8RB_55/rA1	AALVFL	experimental			PTPN6
2702	IL8RB_55/rA1	AALVFL	experimental			PTPN6
3037	IL8RB_55/rA1	AALVFL	experimental			PTPN6
3209	IL8RB_55/rA1	AALVFL	experimental			PTPN6
3716	IL8RB_55/rA1	AALVFL	experimental			PTPN6
3753	IL8RB_55/rA1	AALVFL	experimental			PTPN6
269	INSR_1185	yETDYY	experimental			APS,PTPN11,SH2B1,GRB14,GRB10
334	INSR_1185	yETDYY	experimental			APS,PTPN11,SH2B1,GRB14,GRB10
813	INSR_1185	yETDYY	experimental			APS,PTPN11,SH2B1,GRB14,GRB10
1320	INSR_1185	yETDYY	experimental			APS,PTPN11,SH2B1,GRB14,GRB10
1827	INSR_1185	yETDYY	experimental			APS,PTPN11,SH2B1,GRB14,GRB10
2050	INSR_1185	yETDYY	experimental			APS,PTPN11,SH2B1,GRB14,GRB10
2171	INSR_1185	yETDYY	experimental			APS,PTPN11,SH2B1,GRB14,GRB10
2557	INSR_1185	yETDYY	experimental			APS,PTPN11,SH2B1,GRB14,GRB10
3064	INSR_1185	yETDYY	experimental			APS,PTPN11,SH2B1,GRB14,GRB10
3543	INSR_1185	yETDYY	experimental			APS,PTPN11,SH2B1,GRB14,GRB10
3608	INSR_1185	yETDYY	experimental			APS,PTPN11,SH2B1,GRB14,GRB10
300	INSR_1185/rA1	AETDYY	experimental			APS,PTPN11,SH2B1,GRB14,GRB10
365	INSR_1185/rA1	AETDYY	experimental			APS,PTPN11,SH2B1,GRB14,GRB10
844	INSR_1185/rA1	AETDYY	experimental			APS,PTPN11,SH2B1,GRB14,GRB10
1351	INSR_1185/rA1	AETDYY	experimental			APS,PTPN11,SH2B1,GRB14,GRB10
1858	INSR_1185/rA1	AETDYY	experimental			APS,PTPN11,SH2B1,GRB14,GRB10
2081	INSR_1185/rA1	AETDYY	experimental			APS,PTPN11,SH2B1,GRB14,GRB10
2202	INSR_1185/rA1	AETDYY	experimental			APS,PTPN11,SH2B1,GRB14,GRB10
2588	INSR_1185/rA1	AETDYY	experimental			APS,PTPN11,SH2B1,GRB14,GRB10
3095	INSR_1185/rA1	AETDYY	experimental			APS,PTPN11,SH2B1,GRB14,GRB10
3574	INSR_1185/rA1	AETDYY	experimental			APS,PTPN11,SH2B1,GRB14,GRB10
3639	INSR_1185/rA1	AETDYY	experimental			APS,PTPN11,SH2B1,GRB14,GRB10
66	INSR_999	yLSASD	experimental			IRS1
573	INSR_999	yLSASD	experimental			IRS1
1080	INSR_999	yLSASD	experimental			IRS1
1252	INSR_999	yLSASD	experimental			IRS1
1559	INSR_999	yLSASD	experimental			IRS1
2066	INSR_999	yLSASD	experimental			IRS1
2317	INSR_999	yLSASD	experimental			IRS1
2796	INSR_999	yLSASD	experimental			IRS1
3303	INSR_999	yLSASD	experimental			IRS1
3810	INSR_999	yLSASD	experimental			IRS1
97	INSR_999/rA1	ALSASD	experimental			IRS1
604	INSR_999/rA1	ALSASD	experimental			IRS1
1111	INSR_999/rA1	ALSASD	experimental			IRS1
1283	INSR_999/rA1	ALSASD	experimental			IRS1
1590	INSR_999/rA1	ALSASD	experimental			IRS1
2097	INSR_999/rA1	ALSASD	experimental			IRS1
2348	INSR_999/rA1	ALSASD	experimental			IRS1
2827	INSR_999/rA1	ALSASD	experimental			IRS1
3334	INSR_999/rA1	ALSASD	experimental			IRS1
3841	INSR_999/rA1	ALSASD	experimental			IRS1
263	IRS1_46	yYENEK	experimental			IRS1
770	IRS1_46	yYENEK	experimental			IRS1
942	IRS1_46	yYENEK	experimental			IRS1
1249	IRS1_46	yYENEK	experimental			IRS1
1756	IRS1_46	yYENEK	experimental			IRS1
2007	IRS1_46	yYENEK	experimental			IRS1
2486	IRS1_46	yYENEK	experimental			IRS1
2993	IRS1_46	yYENEK	experimental			IRS1
3500	IRS1_46	yYENEK	experimental			IRS1
3723	IRS1_46	yYENEK	experimental			IRS1
294	IRS1_46/rA1	AYENEK	experimental			IRS1
801	IRS1_46/rA1	AYENEK	experimental			IRS1
973	IRS1_46/rA1	AYENEK	experimental			IRS1
1280	IRS1_46/rA1	AYENEK	experimental			IRS1
1787	IRS1_46/rA1	AYENEK	experimental			IRS1
2038	IRS1_46/rA1	AYENEK	experimental			IRS1
2517	IRS1_46/rA1	AYENEK	experimental			IRS1
3024	IRS1_46/rA1	AYENEK	experimental			IRS1
3531	IRS1_46/rA1	AYENEK	experimental			IRS1
3754	IRS1_46/rA1	AYENEK	experimental			IRS1
267	IRS1_47	yENEKK	experimental			GRB2,SH3BP2
960	IRS1_47	yENEKK	experimental			GRB2,SH3BP2
997	IRS1_47	yENEKK	experimental			GRB2,SH3BP2
1504	IRS1_47	yENEKK	experimental			GRB2,SH3BP2
1862	IRS1_47	yENEKK	experimental			GRB2,SH3BP2
2011	IRS1_47	yENEKK	experimental			GRB2,SH3BP2
2490	IRS1_47	yENEKK	experimental			GRB2,SH3BP2
2741	IRS1_47	yENEKK	experimental			GRB2,SH3BP2
3248	IRS1_47	yENEKK	experimental			GRB2,SH3BP2
3555	IRS1_47	yENEKK	experimental			GRB2,SH3BP2
3727	IRS1_47	yENEKK	experimental			GRB2,SH3BP2
298	IRS1_47/rA1	AENEKK	experimental			GRB2,SH3BP2
991	IRS1_47/rA1	AENEKK	experimental			GRB2,SH3BP2
1028	IRS1_47/rA1	AENEKK	experimental			GRB2,SH3BP2
1535	IRS1_47/rA1	AENEKK	experimental			GRB2,SH3BP2
1893	IRS1_47/rA1	AENEKK	experimental			GRB2,SH3BP2
2042	IRS1_47/rA1	AENEKK	experimental			GRB2,SH3BP2
2521	IRS1_47/rA1	AENEKK	experimental			GRB2,SH3BP2
2772	IRS1_47/rA1	AENEKK	experimental			GRB2,SH3BP2
3279	IRS1_47/rA1	AENEKK	experimental			GRB2,SH3BP2
3586	IRS1_47/rA1	AENEKK	experimental			GRB2,SH3BP2
3758	IRS1_47/rA1	AENEKK	experimental			GRB2,SH3BP2
325	IRS1_612	yMPMSPG	experimental			IRS1
832	IRS1_612	yMPMSPG	experimental			IRS1
1004	IRS1_612	yMPMSPG	experimental			IRS1
1311	IRS1_612	yMPMSPG	experimental			IRS1
1818	IRS1_612	yMPMSPG	experimental			IRS1
2069	IRS1_612	yMPMSPG	experimental			IRS1
2548	IRS1_612	yMPMSPG	experimental			IRS1
3055	IRS1_612	yMPMSPG	experimental			IRS1
3562	IRS1_612	yMPMSPG	experimental			IRS1
3785	IRS1_612	yMPMSPG	experimental			IRS1
356	IRS1_612/rA1	AMPMSPG	experimental			IRS1
863	IRS1_612/rA1	AMPMSPG	experimental			IRS1
1035	IRS1_612/rA1	AMPMSPG	experimental			IRS1
1342	IRS1_612/rA1	AMPMSPG	experimental			IRS1
1849	IRS1_612/rA1	AMPMSPG	experimental			IRS1
2100	IRS1_612/rA1	AMPMSPG	experimental			IRS1
2579	IRS1_612/rA1	AMPMSPG	experimental			IRS1
3086	IRS1_612/rA1	AMPMSPG	experimental			IRS1
3593	IRS1_612/rA1	AMPMSPG	experimental			IRS1
3816	IRS1_612/rA1	AMPMSPG	experimental			IRS1
387	IRS1_632	yMPMSPK	experimental			IRS1
894	IRS1_632	yMPMSPK	experimental			IRS1
1066	IRS1_632	yMPMSPK	experimental			IRS1
1373	IRS1_632	yMPMSPK	experimental			IRS1
1880	IRS1_632	yMPMSPK	experimental			IRS1
2131	IRS1_632	yMPMSPK	experimental			IRS1
2610	IRS1_632	yMPMSPK	experimental			IRS1
3117	IRS1_632	yMPMSPK	experimental			IRS1
3624	IRS1_632	yMPMSPK	experimental			IRS1
3847	IRS1_632	yMPMSPK	experimental			IRS1
418	IRS1_632/rA1	AMPMSPK	experimental			IRS1
925	IRS1_632/rA1	AMPMSPK	experimental			IRS1
1097	IRS1_632/rA1	AMPMSPK	experimental			IRS1
1404	IRS1_632/rA1	AMPMSPK	experimental			IRS1
1911	IRS1_632/rA1	AMPMSPK	experimental			IRS1
2162	IRS1_632/rA1	AMPMSPK	experimental			IRS1
2641	IRS1_632/rA1	AMPMSPK	experimental			IRS1
3148	IRS1_632/rA1	AMPMSPK	experimental			IRS1
3655	IRS1_632/rA1	AMPMSPK	experimental			IRS1
3878	IRS1_632/rA1	AMPMSPK	experimental			IRS1
449	IRS1_662	yMMMSP	experimental			IRS1
956	IRS1_662	yMMMSP	experimental			IRS1
1128	IRS1_662	yMMMSP	experimental			IRS1
1435	IRS1_662	yMMMSP	experimental			IRS1
1942	IRS1_662	yMMMSP	experimental			IRS1
2193	IRS1_662	yMMMSP	experimental			IRS1
2672	IRS1_662	yMMMSP	experimental			IRS1
3179	IRS1_662	yMMMSP	experimental			IRS1
3686	IRS1_662	yMMMSP	experimental			IRS1
3909	IRS1_662	yMMMSP	experimental			IRS1
480	IRS1_662/rA1	AMMMSP	experimental			IRS1
987	IRS1_662/rA1	AMMMSP	experimental			IRS1
1159	IRS1_662/rA1	AMMMSP	experimental			IRS1
1466	IRS1_662/rA1	AMMMSP	experimental			IRS1
1973	IRS1_662/rA1	AMMMSP	experimental			IRS1
2224	IRS1_662/rA1	AMMMSP	experimental			IRS1
2703	IRS1_662/rA1	AMMMSP	experimental			IRS1
3210	IRS1_662/rA1	AMMMSP	experimental			IRS1
3717	IRS1_662/rA1	AMMMSP	experimental			IRS1
3940	IRS1_662/rA1	AMMMSP	experimental			IRS1
4	IRS1_896	yVNIEF	experimental			IRS1
511	IRS1_896	yVNIEF	experimental			IRS1
1018	IRS1_896	yVNIEF	experimental			IRS1
1190	IRS1_896	yVNIEF	experimental			IRS1
1497	IRS1_896	yVNIEF	experimental			IRS1
2004	IRS1_896	yVNIEF	experimental			IRS1
2255	IRS1_896	yVNIEF	experimental			IRS1
2734	IRS1_896	yVNIEF	experimental			IRS1
3241	IRS1_896	yVNIEF	experimental			IRS1
3748	IRS1_896	yVNIEF	experimental			IRS1
35	IRS1_896/rA1	AVNIEF	experimental			IRS1
542	IRS1_896/rA1	AVNIEF	experimental			IRS1
1049	IRS1_896/rA1	AVNIEF	experimental			IRS1
1221	IRS1_896/rA1	AVNIEF	experimental			IRS1
1528	IRS1_896/rA1	AVNIEF	experimental			IRS1
2035	IRS1_896/rA1	AVNIEF	experimental			IRS1
2286	IRS1_896/rA1	AVNIEF	experimental			IRS1
2765	IRS1_896/rA1	AVNIEF	experimental			IRS1
3272	IRS1_896/rA1	AVNIEF	experimental			IRS1
3779	IRS1_896/rA1	AVNIEF	experimental			IRS1
8	IRS1_941	yMNMDL	experimental			GRB2,PIK3R1
208	IRS1_941	yMNMDL	experimental			GRB2,PIK3R1
515	IRS1_941	yMNMDL	experimental			GRB2,PIK3R1
1208	IRS1_941	yMNMDL	experimental			GRB2,PIK3R1
1245	IRS1_941	yMNMDL	experimental			GRB2,PIK3R1
1752	IRS1_941	yMNMDL	experimental			GRB2,PIK3R1
2110	IRS1_941	yMNMDL	experimental			GRB2,PIK3R1
2259	IRS1_941	yMNMDL	experimental			GRB2,PIK3R1
2738	IRS1_941	yMNMDL	experimental			GRB2,PIK3R1
2989	IRS1_941	yMNMDL	experimental			GRB2,PIK3R1
3496	IRS1_941	yMNMDL	experimental			GRB2,PIK3R1
39	IRS1_941/rA1	AMNMDL	experimental			GRB2,PIK3R1
239	IRS1_941/rA1	AMNMDL	experimental			GRB2,PIK3R1
546	IRS1_941/rA1	AMNMDL	experimental			GRB2,PIK3R1
1239	IRS1_941/rA1	AMNMDL	experimental			GRB2,PIK3R1
1276	IRS1_941/rA1	AMNMDL	experimental			GRB2,PIK3R1
1783	IRS1_941/rA1	AMNMDL	experimental			GRB2,PIK3R1
2141	IRS1_941/rA1	AMNMDL	experimental			GRB2,PIK3R1
2290	IRS1_941/rA1	AMNMDL	experimental			GRB2,PIK3R1
2769	IRS1_941/rA1	AMNMDL	experimental			GRB2,PIK3R1
3020	IRS1_941/rA1	AMNMDL	experimental			GRB2,PIK3R1
3527	IRS1_941/rA1	AMNMDL	experimental			GRB2,PIK3R1
196	IRS2_823	yVLMSS	experimental			PIK3R1
447	IRS2_823	yVLMSS	experimental			PIK3R1
889	IRS2_823	yVLMSS	experimental			PIK3R1
954	IRS2_823	yVLMSS	experimental			PIK3R1
1433	IRS2_823	yVLMSS	experimental			PIK3R1
1940	IRS2_823	yVLMSS	experimental			PIK3R1
2447	IRS2_823	yVLMSS	experimental			PIK3R1
2670	IRS2_823	yVLMSS	experimental			PIK3R1
2977	IRS2_823	yVLMSS	experimental			PIK3R1
3177	IRS2_823	yVLMSS	experimental			PIK3R1
3684	IRS2_823	yVLMSS	experimental			PIK3R1
227	IRS2_823/rA1	AVLMSS	experimental			PIK3R1
478	IRS2_823/rA1	AVLMSS	experimental			PIK3R1
920	IRS2_823/rA1	AVLMSS	experimental			PIK3R1
985	IRS2_823/rA1	AVLMSS	experimental			PIK3R1
1464	IRS2_823/rA1	AVLMSS	experimental			PIK3R1
1971	IRS2_823/rA1	AVLMSS	experimental			PIK3R1
2478	IRS2_823/rA1	AVLMSS	experimental			PIK3R1
2701	IRS2_823/rA1	AVLMSS	experimental			PIK3R1
3008	IRS2_823/rA1	AVLMSS	experimental			PIK3R1
3208	IRS2_823/rA1	AVLMSS	experimental			PIK3R1
3715	IRS2_823/rA1	AVLMSS	experimental			PIK3R1
197	IRS4_1016	yIEVIF	experimental			PLCG1,PTPN11
262	IRS4_1016	yIEVIF	experimental			PLCG1,PTPN11
769	IRS4_1016	yIEVIF	experimental			PLCG1,PTPN11
1248	IRS4_1016	yIEVIF	experimental			PLCG1,PTPN11
1634	IRS4_1016	yIEVIF	experimental			PLCG1,PTPN11
1755	IRS4_1016	yIEVIF	experimental			PLCG1,PTPN11
2485	IRS4_1016	yIEVIF	experimental			PLCG1,PTPN11
2820	IRS4_1016	yIEVIF	experimental			PLCG1,PTPN11
2992	IRS4_1016	yIEVIF	experimental			PLCG1,PTPN11
3499	IRS4_1016	yIEVIF	experimental			PLCG1,PTPN11
3536	IRS4_1016	yIEVIF	experimental			PLCG1,PTPN11
228	IRS4_1016/rA1	AIEVIF	experimental			PLCG1,PTPN11
293	IRS4_1016/rA1	AIEVIF	experimental			PLCG1,PTPN11
800	IRS4_1016/rA1	AIEVIF	experimental			PLCG1,PTPN11
1279	IRS4_1016/rA1	AIEVIF	experimental			PLCG1,PTPN11
1665	IRS4_1016/rA1	AIEVIF	experimental			PLCG1,PTPN11
1786	IRS4_1016/rA1	AIEVIF	experimental			PLCG1,PTPN11
2516	IRS4_1016/rA1	AIEVIF	experimental			PLCG1,PTPN11
2851	IRS4_1016/rA1	AIEVIF	experimental			PLCG1,PTPN11
3023	IRS4_1016/rA1	AIEVIF	experimental			PLCG1,PTPN11
3530	IRS4_1016/rA1	AIEVIF	experimental			PLCG1,PTPN11
3567	IRS4_1016/rA1	AIEVIF	experimental			PLCG1,PTPN11
278	IRS4_921	yVNMDF	experimental			GRB2,PIK3R1
315	IRS4_921	yVNMDF	experimental			GRB2,PIK3R1
822	IRS4_921	yVNMDF	experimental			GRB2,PIK3R1
994	IRS4_921	yVNMDF	experimental			GRB2,PIK3R1
1329	IRS4_921	yVNMDF	experimental			GRB2,PIK3R1
1808	IRS4_921	yVNMDF	experimental			GRB2,PIK3R1
2059	IRS4_921	yVNMDF	experimental			GRB2,PIK3R1
2566	IRS4_921	yVNMDF	experimental			GRB2,PIK3R1
2873	IRS4_921	yVNMDF	experimental			GRB2,PIK3R1
3045	IRS4_921	yVNMDF	experimental			GRB2,PIK3R1
3552	IRS4_921	yVNMDF	experimental			GRB2,PIK3R1
309	IRS4_921/rA1	AVNMDF	experimental			GRB2,PIK3R1
346	IRS4_921/rA1	AVNMDF	experimental			GRB2,PIK3R1
853	IRS4_921/rA1	AVNMDF	experimental			GRB2,PIK3R1
1025	IRS4_921/rA1	AVNMDF	experimental			GRB2,PIK3R1
1360	IRS4_921/rA1	AVNMDF	experimental			GRB2,PIK3R1
1839	IRS4_921/rA1	AVNMDF	experimental			GRB2,PIK3R1
2090	IRS4_921/rA1	AVNMDF	experimental			GRB2,PIK3R1
2597	IRS4_921/rA1	AVNMDF	experimental			GRB2,PIK3R1
2904	IRS4_921/rA1	AVNMDF	experimental			GRB2,PIK3R1
3076	IRS4_921/rA1	AVNMDF	experimental			GRB2,PIK3R1
3583	IRS4_921/rA1	AVNMDF	experimental			GRB2,PIK3R1
216	ITPR3_1588	yKNIIE	experimental			GRB2
253	ITPR3_1588	yKNIIE	experimental			GRB2
760	ITPR3_1588	yKNIIE	experimental			GRB2
932	ITPR3_1588	yKNIIE	experimental			GRB2
1267	ITPR3_1588	yKNIIE	experimental			GRB2
1746	ITPR3_1588	yKNIIE	experimental			GRB2
1997	ITPR3_1588	yKNIIE	experimental			GRB2
2504	ITPR3_1588	yKNIIE	experimental			GRB2
2811	ITPR3_1588	yKNIIE	experimental			GRB2
2983	ITPR3_1588	yKNIIE	experimental			GRB2
3490	ITPR3_1588	yKNIIE	experimental			GRB2
247	ITPR3_1588/rA1	AKNIIE	experimental			GRB2
284	ITPR3_1588/rA1	AKNIIE	experimental			GRB2
791	ITPR3_1588/rA1	AKNIIE	experimental			GRB2
963	ITPR3_1588/rA1	AKNIIE	experimental			GRB2
1298	ITPR3_1588/rA1	AKNIIE	experimental			GRB2
1777	ITPR3_1588/rA1	AKNIIE	experimental			GRB2
2028	ITPR3_1588/rA1	AKNIIE	experimental			GRB2
2535	ITPR3_1588/rA1	AKNIIE	experimental			GRB2
2842	ITPR3_1588/rA1	AKNIIE	experimental			GRB2
3014	ITPR3_1588/rA1	AKNIIE	experimental			GRB2
3521	ITPR3_1588/rA1	AKNIIE	experimental			GRB2
331	JAK2_201	yNSVSY	experimental			PTPN11
396	JAK2_201	yNSVSY	experimental			PTPN11
875	JAK2_201	yNSVSY	experimental			PTPN11
1382	JAK2_201	yNSVSY	experimental			PTPN11
1889	JAK2_201	yNSVSY	experimental			PTPN11
2112	JAK2_201	yNSVSY	experimental			PTPN11
2233	JAK2_201	yNSVSY	experimental			PTPN11
2619	JAK2_201	yNSVSY	experimental			PTPN11
3126	JAK2_201	yNSVSY	experimental			PTPN11
3605	JAK2_201	yNSVSY	experimental			PTPN11
3670	JAK2_201	yNSVSY	experimental			PTPN11
362	JAK2_201/rA1	ANSVSY	experimental			PTPN11
427	JAK2_201/rA1	ANSVSY	experimental			PTPN11
906	JAK2_201/rA1	ANSVSY	experimental			PTPN11
1413	JAK2_201/rA1	ANSVSY	experimental			PTPN11
1920	JAK2_201/rA1	ANSVSY	experimental			PTPN11
2143	JAK2_201/rA1	ANSVSY	experimental			PTPN11
2264	JAK2_201/rA1	ANSVSY	experimental			PTPN11
2650	JAK2_201/rA1	ANSVSY	experimental			PTPN11
3157	JAK2_201/rA1	ANSVSY	experimental			PTPN11
3636	JAK2_201/rA1	ANSVSY	experimental			PTPN11
3701	JAK2_201/rA1	ANSVSY	experimental			PTPN11
25	JUNB_182	yTNLSS	experimental			ABL1
504	JUNB_182	yTNLSS	experimental			ABL1
704	JUNB_182	yTNLSS	experimental			ABL1
1011	JUNB_182	yTNLSS	experimental			ABL1
1741	JUNB_182	yTNLSS	experimental			ABL1
1890	JUNB_182	yTNLSS	experimental			ABL1
2248	JUNB_182	yTNLSS	experimental			ABL1
2755	JUNB_182	yTNLSS	experimental			ABL1
2792	JUNB_182	yTNLSS	experimental			ABL1
3234	JUNB_182	yTNLSS	experimental			ABL1
3485	JUNB_182	yTNLSS	experimental			ABL1
56	JUNB_182/rA1	ATNLSS	experimental			ABL1
535	JUNB_182/rA1	ATNLSS	experimental			ABL1
735	JUNB_182/rA1	ATNLSS	experimental			ABL1
1042	JUNB_182/rA1	ATNLSS	experimental			ABL1
1772	JUNB_182/rA1	ATNLSS	experimental			ABL1
1921	JUNB_182/rA1	ATNLSS	experimental			ABL1
2279	JUNB_182/rA1	ATNLSS	experimental			ABL1
2786	JUNB_182/rA1	ATNLSS	experimental			ABL1
2823	JUNB_182/rA1	ATNLSS	experimental			ABL1
3265	JUNB_182/rA1	ATNLSS	experimental			ABL1
3516	JUNB_182/rA1	ATNLSS	experimental			ABL1
2883	K	K	LC Control			Custom Sequence
3472	K	K	LC Control			Custom Sequence
81	KIT_703	yKNLLH	experimental			GRB2
774	KIT_703	yKNLLH	experimental			GRB2
811	KIT_703	yKNLLH	experimental			GRB2
1318	KIT_703	yKNLLH	experimental			GRB2
1676	KIT_703	yKNLLH	experimental			GRB2
1825	KIT_703	yKNLLH	experimental			GRB2
2304	KIT_703	yKNLLH	experimental			GRB2
2555	KIT_703	yKNLLH	experimental			GRB2
3062	KIT_703	yKNLLH	experimental			GRB2
3369	KIT_703	yKNLLH	experimental			GRB2
3541	KIT_703	yKNLLH	experimental			GRB2
112	KIT_703/rA1	AKNLLH	experimental			GRB2
805	KIT_703/rA1	AKNLLH	experimental			GRB2
842	KIT_703/rA1	AKNLLH	experimental			GRB2
1349	KIT_703/rA1	AKNLLH	experimental			GRB2
1707	KIT_703/rA1	AKNLLH	experimental			GRB2
1856	KIT_703/rA1	AKNLLH	experimental			GRB2
2335	KIT_703/rA1	AKNLLH	experimental			GRB2
2586	KIT_703/rA1	AKNLLH	experimental			GRB2
3093	KIT_703/rA1	AKNLLH	experimental			GRB2
3400	KIT_703/rA1	AKNLLH	experimental			GRB2
3572	KIT_703/rA1	AKNLLH	experimental			GRB2
336	KIT_936	ySNLAN	experimental			PLCG1,GRB2,GRB7
508	KIT_936	ySNLAN	experimental			PLCG1,GRB2,GRB7
815	KIT_936	ySNLAN	experimental			PLCG1,GRB2,GRB7
1322	KIT_936	ySNLAN	experimental			PLCG1,GRB2,GRB7
1573	KIT_936	ySNLAN	experimental			PLCG1,GRB2,GRB7
2052	KIT_936	ySNLAN	experimental			PLCG1,GRB2,GRB7
2559	KIT_936	ySNLAN	experimental			PLCG1,GRB2,GRB7
3066	KIT_936	ySNLAN	experimental			PLCG1,GRB2,GRB7
3289	KIT_936	ySNLAN	experimental			PLCG1,GRB2,GRB7
3796	KIT_936	ySNLAN	experimental			PLCG1,GRB2,GRB7
367	KIT_936/rA1	ASNLAN	experimental			PLCG1,GRB2,GRB7
539	KIT_936/rA1	ASNLAN	experimental			PLCG1,GRB2,GRB7
846	KIT_936/rA1	ASNLAN	experimental			PLCG1,GRB2,GRB7
1353	KIT_936/rA1	ASNLAN	experimental			PLCG1,GRB2,GRB7
1604	KIT_936/rA1	ASNLAN	experimental			PLCG1,GRB2,GRB7
2083	KIT_936/rA1	ASNLAN	experimental			PLCG1,GRB2,GRB7
2590	KIT_936/rA1	ASNLAN	experimental			PLCG1,GRB2,GRB7
3097	KIT_936/rA1	ASNLAN	experimental			PLCG1,GRB2,GRB7
3320	KIT_936/rA1	ASNLAN	experimental			PLCG1,GRB2,GRB7
3827	KIT_936/rA1	ASNLAN	experimental			PLCG1,GRB2,GRB7
7	KLRA1_8	ySMVRF	experimental			PTPN11,PTPN6
514	KLRA1_8	ySMVRF	experimental			PTPN11,PTPN6
1021	KLRA1_8	ySMVRF	experimental			PTPN11,PTPN6
1179	KLRA1_8	ySMVRF	experimental			PTPN11,PTPN6
1244	KLRA1_8	ySMVRF	experimental			PTPN11,PTPN6
1751	KLRA1_8	ySMVRF	experimental			PTPN11,PTPN6
2258	KLRA1_8	ySMVRF	experimental			PTPN11,PTPN6
2737	KLRA1_8	ySMVRF	experimental			PTPN11,PTPN6
2802	KLRA1_8	ySMVRF	experimental			PTPN11,PTPN6
3244	KLRA1_8	ySMVRF	experimental			PTPN11,PTPN6
3495	KLRA1_8	ySMVRF	experimental			PTPN11,PTPN6
38	KLRA1_8/rA1	ASMVRF	experimental			PTPN11,PTPN6
545	KLRA1_8/rA1	ASMVRF	experimental			PTPN11,PTPN6
1052	KLRA1_8/rA1	ASMVRF	experimental			PTPN11,PTPN6
1210	KLRA1_8/rA1	ASMVRF	experimental			PTPN11,PTPN6
1275	KLRA1_8/rA1	ASMVRF	experimental			PTPN11,PTPN6
1782	KLRA1_8/rA1	ASMVRF	experimental			PTPN11,PTPN6
2289	KLRA1_8/rA1	ASMVRF	experimental			PTPN11,PTPN6
2768	KLRA1_8/rA1	ASMVRF	experimental			PTPN11,PTPN6
2833	KLRA1_8/rA1	ASMVRF	experimental			PTPN11,PTPN6
3275	KLRA1_8/rA1	ASMVRF	experimental			PTPN11,PTPN6
3526	KLRA1_8/rA1	ASMVRF	experimental			PTPN11,PTPN6
392	KLRC1_40	yAELNL	experimental			PTPN11,PTPN6
643	KLRC1_40	yAELNL	experimental			PTPN11,PTPN6
1122	KLRC1_40	yAELNL	experimental			PTPN11,PTPN6
1629	KLRC1_40	yAELNL	experimental			PTPN11,PTPN6
2015	KLRC1_40	yAELNL	experimental			PTPN11,PTPN6
2136	KLRC1_40	yAELNL	experimental			PTPN11,PTPN6
2359	KLRC1_40	yAELNL	experimental			PTPN11,PTPN6
2866	KLRC1_40	yAELNL	experimental			PTPN11,PTPN6
3173	KLRC1_40	yAELNL	experimental			PTPN11,PTPN6
3373	KLRC1_40	yAELNL	experimental			PTPN11,PTPN6
3852	KLRC1_40	yAELNL	experimental			PTPN11,PTPN6
423	KLRC1_40/rA1	AAELNL	experimental			PTPN11,PTPN6
674	KLRC1_40/rA1	AAELNL	experimental			PTPN11,PTPN6
1153	KLRC1_40/rA1	AAELNL	experimental			PTPN11,PTPN6
1660	KLRC1_40/rA1	AAELNL	experimental			PTPN11,PTPN6
2046	KLRC1_40/rA1	AAELNL	experimental			PTPN11,PTPN6
2167	KLRC1_40/rA1	AAELNL	experimental			PTPN11,PTPN6
2390	KLRC1_40/rA1	AAELNL	experimental			PTPN11,PTPN6
2897	KLRC1_40/rA1	AAELNL	experimental			PTPN11,PTPN6
3204	KLRC1_40/rA1	AAELNL	experimental			PTPN11,PTPN6
3404	KLRC1_40/rA1	AAELNL	experimental			PTPN11,PTPN6
3883	KLRC1_40/rA1	AAELNL	experimental			PTPN11,PTPN6
2914	L	L	LC Control			Custom Sequence
3503	L	L	LC Control			Custom Sequence
19	LAT_200	yVNVPE	experimental			GRAP2,GRAP,VAV1,PLCG1,GRB2,ZAP70,PIK3R1
712	LAT_200	yVNVPE	experimental			GRAP2,GRAP,VAV1,PLCG1,GRB2,ZAP70,PIK3R1
749	LAT_200	yVNVPE	experimental			GRAP2,GRAP,VAV1,PLCG1,GRB2,ZAP70,PIK3R1
1256	LAT_200	yVNVPE	experimental			GRAP2,GRAP,VAV1,PLCG1,GRB2,ZAP70,PIK3R1
1614	LAT_200	yVNVPE	experimental			GRAP2,GRAP,VAV1,PLCG1,GRB2,ZAP70,PIK3R1
1763	LAT_200	yVNVPE	experimental			GRAP2,GRAP,VAV1,PLCG1,GRB2,ZAP70,PIK3R1
2242	LAT_200	yVNVPE	experimental			GRAP2,GRAP,VAV1,PLCG1,GRB2,ZAP70,PIK3R1
2493	LAT_200	yVNVPE	experimental			GRAP2,GRAP,VAV1,PLCG1,GRB2,ZAP70,PIK3R1
3000	LAT_200	yVNVPE	experimental			GRAP2,GRAP,VAV1,PLCG1,GRB2,ZAP70,PIK3R1
3307	LAT_200	yVNVPE	experimental			GRAP2,GRAP,VAV1,PLCG1,GRB2,ZAP70,PIK3R1
3479	LAT_200	yVNVPE	experimental			GRAP2,GRAP,VAV1,PLCG1,GRB2,ZAP70,PIK3R1
50	LAT_200/rA1	AVNVPE	experimental			GRAP2,GRAP,VAV1,PLCG1,GRB2,ZAP70,PIK3R1
743	LAT_200/rA1	AVNVPE	experimental			GRAP2,GRAP,VAV1,PLCG1,GRB2,ZAP70,PIK3R1
780	LAT_200/rA1	AVNVPE	experimental			GRAP2,GRAP,VAV1,PLCG1,GRB2,ZAP70,PIK3R1
1287	LAT_200/rA1	AVNVPE	experimental			GRAP2,GRAP,VAV1,PLCG1,GRB2,ZAP70,PIK3R1
1645	LAT_200/rA1	AVNVPE	experimental			GRAP2,GRAP,VAV1,PLCG1,GRB2,ZAP70,PIK3R1
1794	LAT_200/rA1	AVNVPE	experimental			GRAP2,GRAP,VAV1,PLCG1,GRB2,ZAP70,PIK3R1
2273	LAT_200/rA1	AVNVPE	experimental			GRAP2,GRAP,VAV1,PLCG1,GRB2,ZAP70,PIK3R1
2524	LAT_200/rA1	AVNVPE	experimental			GRAP2,GRAP,VAV1,PLCG1,GRB2,ZAP70,PIK3R1
3031	LAT_200/rA1	AVNVPE	experimental			GRAP2,GRAP,VAV1,PLCG1,GRB2,ZAP70,PIK3R1
3338	LAT_200/rA1	AVNVPE	experimental			GRAP2,GRAP,VAV1,PLCG1,GRB2,ZAP70,PIK3R1
3510	LAT_200/rA1	AVNVPE	experimental			GRAP2,GRAP,VAV1,PLCG1,GRB2,ZAP70,PIK3R1
326	LAT_220	yVNVSQ	experimental			VAV1,GRB2,PLCG1,GRAP2,PIK3R1
498	LAT_220	yVNVSQ	experimental			VAV1,GRB2,PLCG1,GRAP2,PIK3R1
833	LAT_220	yVNVSQ	experimental			VAV1,GRB2,PLCG1,GRAP2,PIK3R1
1312	LAT_220	yVNVSQ	experimental			VAV1,GRB2,PLCG1,GRAP2,PIK3R1
1563	LAT_220	yVNVSQ	experimental			VAV1,GRB2,PLCG1,GRAP2,PIK3R1
2070	LAT_220	yVNVSQ	experimental			VAV1,GRB2,PLCG1,GRAP2,PIK3R1
2191	LAT_220	yVNVSQ	experimental			VAV1,GRB2,PLCG1,GRAP2,PIK3R1
2549	LAT_220	yVNVSQ	experimental			VAV1,GRB2,PLCG1,GRAP2,PIK3R1
3056	LAT_220	yVNVSQ	experimental			VAV1,GRB2,PLCG1,GRAP2,PIK3R1
3563	LAT_220	yVNVSQ	experimental			VAV1,GRB2,PLCG1,GRAP2,PIK3R1
3786	LAT_220	yVNVSQ	experimental			VAV1,GRB2,PLCG1,GRAP2,PIK3R1
357	LAT_220/rA1	AVNVSQ	experimental			VAV1,GRB2,PLCG1,GRAP2,PIK3R1
529	LAT_220/rA1	AVNVSQ	experimental			VAV1,GRB2,PLCG1,GRAP2,PIK3R1
864	LAT_220/rA1	AVNVSQ	experimental			VAV1,GRB2,PLCG1,GRAP2,PIK3R1
1343	LAT_220/rA1	AVNVSQ	experimental			VAV1,GRB2,PLCG1,GRAP2,PIK3R1
1594	LAT_220/rA1	AVNVSQ	experimental			VAV1,GRB2,PLCG1,GRAP2,PIK3R1
2101	LAT_220/rA1	AVNVSQ	experimental			VAV1,GRB2,PLCG1,GRAP2,PIK3R1
2222	LAT_220/rA1	AVNVSQ	experimental			VAV1,GRB2,PLCG1,GRAP2,PIK3R1
2580	LAT_220/rA1	AVNVSQ	experimental			VAV1,GRB2,PLCG1,GRAP2,PIK3R1
3087	LAT_220/rA1	AVNVSQ	experimental			VAV1,GRB2,PLCG1,GRAP2,PIK3R1
3594	LAT_220/rA1	AVNVSQ	experimental			VAV1,GRB2,PLCG1,GRAP2,PIK3R1
3817	LAT_220/rA1	AVNVSQ	experimental			VAV1,GRB2,PLCG1,GRAP2,PIK3R1
16	LAT_255	yENLQE	experimental			GRAP,VAV1,PLCG1,GRB2,ZAP70
188	LAT_255	yENLQE	experimental			GRAP,VAV1,PLCG1,GRB2,ZAP70
523	LAT_255	yENLQE	experimental			GRAP,VAV1,PLCG1,GRB2,ZAP70
1002	LAT_255	yENLQE	experimental			GRAP,VAV1,PLCG1,GRB2,ZAP70
1253	LAT_255	yENLQE	experimental			GRAP,VAV1,PLCG1,GRB2,ZAP70
1760	LAT_255	yENLQE	experimental			GRAP,VAV1,PLCG1,GRB2,ZAP70
1881	LAT_255	yENLQE	experimental			GRAP,VAV1,PLCG1,GRB2,ZAP70
2239	LAT_255	yENLQE	experimental			GRAP,VAV1,PLCG1,GRB2,ZAP70
2746	LAT_255	yENLQE	experimental			GRAP,VAV1,PLCG1,GRB2,ZAP70
3253	LAT_255	yENLQE	experimental			GRAP,VAV1,PLCG1,GRB2,ZAP70
3476	LAT_255	yENLQE	experimental			GRAP,VAV1,PLCG1,GRB2,ZAP70
47	LAT_255/rA1	AENLQE	experimental			GRAP,VAV1,PLCG1,GRB2,ZAP70
219	LAT_255/rA1	AENLQE	experimental			GRAP,VAV1,PLCG1,GRB2,ZAP70
554	LAT_255/rA1	AENLQE	experimental			GRAP,VAV1,PLCG1,GRB2,ZAP70
1033	LAT_255/rA1	AENLQE	experimental			GRAP,VAV1,PLCG1,GRB2,ZAP70
1284	LAT_255/rA1	AENLQE	experimental			GRAP,VAV1,PLCG1,GRB2,ZAP70
1791	LAT_255/rA1	AENLQE	experimental			GRAP,VAV1,PLCG1,GRB2,ZAP70
1912	LAT_255/rA1	AENLQE	experimental			GRAP,VAV1,PLCG1,GRB2,ZAP70
2270	LAT_255/rA1	AENLQE	experimental			GRAP,VAV1,PLCG1,GRB2,ZAP70
2777	LAT_255/rA1	AENLQE	experimental			GRAP,VAV1,PLCG1,GRB2,ZAP70
3284	LAT_255/rA1	AENLQE	experimental			GRAP,VAV1,PLCG1,GRB2,ZAP70
3507	LAT_255/rA1	AENLQE	experimental			GRAP,VAV1,PLCG1,GRB2,ZAP70
70	LAX1_268	yVNMTG	experimental			GRB2,PIK3R1
270	LAX1_268	yVNMTG	experimental			GRB2,PIK3R1
577	LAX1_268	yVNMTG	experimental			GRB2,PIK3R1
1270	LAX1_268	yVNMTG	experimental			GRB2,PIK3R1
1307	LAX1_268	yVNMTG	experimental			GRB2,PIK3R1
1814	LAX1_268	yVNMTG	experimental			GRB2,PIK3R1
2172	LAX1_268	yVNMTG	experimental			GRB2,PIK3R1
2321	LAX1_268	yVNMTG	experimental			GRB2,PIK3R1
2800	LAX1_268	yVNMTG	experimental			GRB2,PIK3R1
3051	LAX1_268	yVNMTG	experimental			GRB2,PIK3R1
3558	LAX1_268	yVNMTG	experimental			GRB2,PIK3R1
101	LAX1_268/rA1	AVNMTG	experimental			GRB2,PIK3R1
301	LAX1_268/rA1	AVNMTG	experimental			GRB2,PIK3R1
608	LAX1_268/rA1	AVNMTG	experimental			GRB2,PIK3R1
1301	LAX1_268/rA1	AVNMTG	experimental			GRB2,PIK3R1
1338	LAX1_268/rA1	AVNMTG	experimental			GRB2,PIK3R1
1845	LAX1_268/rA1	AVNMTG	experimental			GRB2,PIK3R1
2203	LAX1_268/rA1	AVNMTG	experimental			GRB2,PIK3R1
2352	LAX1_268/rA1	AVNMTG	experimental			GRB2,PIK3R1
2831	LAX1_268/rA1	AVNMTG	experimental			GRB2,PIK3R1
3082	LAX1_268/rA1	AVNMTG	experimental			GRB2,PIK3R1
3589	LAX1_268/rA1	AVNMTG	experimental			GRB2,PIK3R1
78	LAX1_294	yENVPA	experimental			GRB2
250	LAX1_294	yENVPA	experimental			GRB2
585	LAX1_294	yENVPA	experimental			GRB2
1064	LAX1_294	yENVPA	experimental			GRB2
1315	LAX1_294	yENVPA	experimental			GRB2
1822	LAX1_294	yENVPA	experimental			GRB2
1943	LAX1_294	yENVPA	experimental			GRB2
2301	LAX1_294	yENVPA	experimental			GRB2
2808	LAX1_294	yENVPA	experimental			GRB2
3315	LAX1_294	yENVPA	experimental			GRB2
3538	LAX1_294	yENVPA	experimental			GRB2
109	LAX1_294/rA1	AENVPA	experimental			GRB2
281	LAX1_294/rA1	AENVPA	experimental			GRB2
616	LAX1_294/rA1	AENVPA	experimental			GRB2
1095	LAX1_294/rA1	AENVPA	experimental			GRB2
1346	LAX1_294/rA1	AENVPA	experimental			GRB2
1853	LAX1_294/rA1	AENVPA	experimental			GRB2
1974	LAX1_294/rA1	AENVPA	experimental			GRB2
2332	LAX1_294/rA1	AENVPA	experimental			GRB2
2839	LAX1_294/rA1	AENVPA	experimental			GRB2
3346	LAX1_294/rA1	AENVPA	experimental			GRB2
3569	LAX1_294/rA1	AENVPA	experimental			GRB2
213	LAX1_373	yENVLT	experimental			GRB2
692	LAX1_373	yENVLT	experimental			GRB2
943	LAX1_373	yENVLT	experimental			GRB2
1450	LAX1_373	yENVLT	experimental			GRB2
1571	LAX1_373	yENVLT	experimental			GRB2
1929	LAX1_373	yENVLT	experimental			GRB2
2436	LAX1_373	yENVLT	experimental			GRB2
2943	LAX1_373	yENVLT	experimental			GRB2
3166	LAX1_373	yENVLT	experimental			GRB2
3473	LAX1_373	yENVLT	experimental			GRB2
3673	LAX1_373	yENVLT	experimental			GRB2
244	LAX1_373/rA1	AENVLT	experimental			GRB2
723	LAX1_373/rA1	AENVLT	experimental			GRB2
974	LAX1_373/rA1	AENVLT	experimental			GRB2
1481	LAX1_373/rA1	AENVLT	experimental			GRB2
1602	LAX1_373/rA1	AENVLT	experimental			GRB2
1960	LAX1_373/rA1	AENVLT	experimental			GRB2
2467	LAX1_373/rA1	AENVLT	experimental			GRB2
2974	LAX1_373/rA1	AENVLT	experimental			GRB2
3197	LAX1_373/rA1	AENVLT	experimental			GRB2
3504	LAX1_373/rA1	AENVLT	experimental			GRB2
[truncated: 1,970 more rows]

## Sheet: Array Layout
Layout#
notes
	C1	C2	C3	C4	C5	C6	C7	C8	C9	C10	C11	C12	C13	C14	C15	C16	C17	C18	C19	C20	C21	C22	C23	C24	C25	C26	C27	C28	C29	C30	C31	stop
R1	Pseudo	Grb2_+	PTPNS1_po2	substrate_896	PTPN11_278	SIGLEC9_433	KLRA1_pos	IRS1_po11	MCTP2_859	TREML1_281	A	Grb2_+	PDCD1_248	SIT1_188	SCN11A_1642	LAT_254	PTPN4_323	IFNAR1_465	LAT_199	XPO7_668	A	Grb2_+	FCGR2B_291	PTPN18_280	JUNB_181	LILRB4_412	SCN5A_1753	SIGLEC12_469	MCF2_898	A	Grb2_+
R2	Y	Grb2_neg	PTPNS1_po2/rA1	substrate_896/rA1	PTPN11_278/rA1	SIGLEC9_433/rA1	KLRA1_pos/rA1	IRS1_po11/rA1	MCTP2_859/rA1	TREML1_281/rA1	Y	Grb2_neg	PDCD1_248/rA1	SIT1_188/rA1	SCN11A_1642/rA1	LAT_254/rA1	PTPN4_323/rA1	IFNAR1_465/rA1	LAT_199/rA1	XPO7_668/rA1	Y	Grb2_neg	FCGR2B_291/rA1	PTPN18_280/rA1	JUNB_181/rA1	LILRB4_412/rA1	SCN5A_1753/rA1	SIGLEC12_469/rA1	MCF2_898/rA1	Y	Grb2_neg
R3	pY	Src_+	MS4A2_218	INSR_999	FASLG_257	CLM1_249	IL2RB_380	LAX1_267	NFAM1_219	GRB7_679_1	pY	Src_+	ERBB3_1196	MET_680	gp60 SU_po2	LAX1_293	MS4A2_po2	PLCG1_291	KIT_702	CEACAM1_492	pY	Src_+	IL4R_712	BCAR1_663	MET_1355	SSTR2_312	PTPN11_579	GPR175_204	FGFR3_551	pY	Src_+
R4	HA_+	Src_neg	MS4A2_218/rA1	INSR_999/rA1	FASLG_257/rA1	CLM1_249/rA1	IL2RB_380/rA1	LAX1_267/rA1	NFAM1_219/rA1	GRB7_679_1/rA1	HA_+	Src_neg	ERBB3_1196/rA1	MET_680/rA1	gp60SU_po2/rA1	LAX1_293/rA1	MS4A2_po2/rA1	PLCG1_291/rA1	KIT_702/rA1	CEACAM1_492/rA1	HA_+	Src_neg	IL4R_712/rA1	BCAR1_663/rA1	MET_1355/rA1	SSTR2_312/rA1	PTPN11_579/rA1	GPR175_204/rA1	FGFR3_551/rA1	HA_+	Src_neg
R5	AFM2+	RASA1_+	TEK_896	RET_1062	PTPRA_294	OR8D1_222	DYRA_po2	LUC7L2_172	F2R_336	GRB7_679_2	AFM2+	RASA1_+	WASF3_150	PDGFRB_715	CD22_po4	SPTAN1_2429	FRS3_454	CEACAM1_po1	CSF1R_923	OR12D2_251	AFM2+	RASA1_+	SIGLEC10_666	NEDD9_628	LAT2_po1	CMKOR1_314	PTK2_946	FGFR2_555	MAPK3_144	AFM2+	RASA1_+
R6	CRP	RASA1_Neg	TEK_896/rA1	RET_1062/rA1	PTPRA_294/rA1	OR8D1_222/rA1	DYRA_po2/rA1	LUC7L2_172/rA1	F2R_336/rA1	GRB7_679_2/rA1	CRP	RASA1_Neg	WASF3_150/rA1	PDGFRB_715/rA1	CD22_po4/rA1	SPTAN1_2429/rA1	FRS3_454/rA1	CEACAM1_po1/rA1	CSF1R_923/rA1	OR12D2_251/rA1	CRP	RASA1_Neg	SIGLEC10_666/rA1	NEDD9_628/rA1	LAT2_po1/rA1	CMKOR1_314/rA1	PTK2_946/rA1	FGFR2_555/rA1	MAPK3_144/rA1	CRP	RASA1_Neg
R7	MCF2_898	LAT_254	LAT2_po4	IL4R_497	PTPRC_1014	mLILRB4_322	RASA1_614	LET23_po2	PTPN4_68	IRS2_822	IRS4_1015	LILRB4_412	IL6R_463	RB1_320	HEXB_277	DST_632	CBL_868	SHC1_238	IL1RL1_99	GRM2_646	MK10_pos	IRS1_po11	NFAM1_po1	CD300A_267	LET23_po1	GRM4_667	LAX1_372	FRS2_471	CD84_261	ITPR3_1587	PTPN4_323
R8	MCF2_898/rA1	LAT_254/rA1	LAT2_po4/rA1	IL4R_497/rA1	PTPRC_1014/rA1	mLILRB4_322/rA1	RASA1_614/rA1	LET23_po2/rA1	PTPN4_68/rA1	IRS2_822/rA1	IRS4_1015/rA1	LILRB4_412/rA1	IL6R_463/rA1	RB1_320/rA1	HEXB_277/rA1	DST_632/rA1	CBL_868/rA1	SHC1_238/rA1	IL1RL1_99/rA1	GRM2_646/rA1	MK10_pos/rA1	IRS1_po11/rA1	NFAM1_po1/rA1	CD300A_267/rA1	LET23_po1/rA1	GRM4_667/rA1	LAX1_372/rA1	FRS2_471/rA1	CD84_261/rA1	ITPR3_1587/rA1	PTPN4_323/rA1
R9	FGFR3_551	LAX1_293	SIGLEC12_469	MCF2_898	ITPR3_1587	CD22_821	SSTR1_225	FLT3_pos	OR51V1_140	EPOR_453	LEPR_986	SSTR2_312	TREML1_281	IRS4_1015	IRS1_46	SIGLEC10_596	Tom1l1_po3	TRKC_pos	IRS1_47	GRM3_655	INSR_1184	LAX1_267	XPO7_668	MK10_pos	FLT3_968	GRM7_670	SOC_pos	TUBA3_431	CTLA4_176	IRS4_920	MS4A2_po2
R10	FGFR3_551/rA1	LAX1_293/rA1	SIGLEC12_469/rA1	MCF2_898/rA1	ITPR3_1587/rA1	CD22_821/rA1	SSTR1_225/rA1	FLT3_pos/rA1	OR51V1_140/rA1	EPOR_453/rA1	LEPR_986/rA1	SSTR2_312/rA1	TREML1_281/rA1	IRS4_1015/rA1	IRS1_46/rA1	SIGLEC10_596/rA1	Tom1l1_po3/rA1	TRKC_pos/rA1	IRS1_47/rA1	GRM3_655/rA1	INSR_1184/rA1	LAX1_267/rA1	XPO7_668/rA1	MK10_pos/rA1	FLT3_968/rA1	GRM7_670/rA1	SOC_pos/rA1	TUBA3_431/rA1	CTLA4_176/rA1	IRS4_920/rA1	MS4A2_po2/rA1
R11	MAPK3_144	SPTAN1_2429	GPR175_204	FGFR3_551	IRS4_920	RANBP17_667	PDGFRA_571	ETV6_313	LRCH4_676	IL2RB_363	IL8RA_46	CMKOR1_314	GRB7_679_1	LEPR_986	substrate_612	LAT_219	CD33_340	SSTR1_80	PTPN11_546	SIT1_126	JAK2_pos	LUC7L2_172	CEACAM1_492	INSR_1184	EGFR_112	KIT_935	PTPN18_302	STAT5B_664	PTPRC_1215	IRS1_895	FRS3_454
R12	MAPK3_144/rA1	SPTAN1_2429/rA1	GPR175_204/rA1	FGFR3_551/rA1	IRS4_920/rA1	RANBP17_667/rA1	PDGFRA_571/rA1	ETV6_313/rA1	LRCH4_676/rA1	IL2RB_363/rA1	IL8RA_46/rA1	CMKOR1_314/rA1	GRB7_679_1/rA1	LEPR_986/rA1	substrate_612/rA1	LAT_219/rA1	CD33_340/rA1	SSTR1_80/rA1	PTPN11_546/rA1	SIT1_126/rA1	JAK2_pos/rA1	LUC7L2_172/rA1	CEACAM1_492/rA1	INSR_1184/rA1	EGFR_112/rA1	KIT_935/rA1	PTPN18_302/rA1	STAT5B_664/rA1	PTPRC_1215/rA1	IRS1_895/rA1	FRS3_454/rA1
R13	CD84_261	DST_632	FGFR2_555	MAPK3_144	IRS1_895	GCET2_127	SIGLEC6_425	RASA1_618	EPHA2_959	CSF3R_813	IL8RB_55	GRM4_667	GRB7_679_2	IL8RA_46	substrate_632	FLT3_954	SIGLEC12_565	SSTR2_pos	EGFR_1137	KLRC1_40	CD22_761	LET23_po2	OR12D2_251	JAK2_pos	PTPRA_798	CD3159	LAT2_po5	CTNND1_649	DAB1_po2	SHC1_pos	CBL_868
R14	CD84_261/rA1	DST_632/rA1	FGFR2_555/rA1	MAPK3_144/rA1	IRS1_895/rA1	GCET2_127/rA1	SIGLEC6_425/rA1	RASA1_618/rA1	EPHA2_959/rA1	CSF3R_813/rA1	IL8RB_55/rA1	GRM4_667/rA1	GRB7_679_2/rA1	IL8RA_46/rA1	substrate_632/rA1	FLT3_954/rA1	SIGLEC12_565/rA1	SSTR2_pos/rA1	EGFR_1137/rA1	KLRC1_40/rA1	CD22_761/rA1	LET23_po2/rA1	OR12D2_251/rA1	JAK2_pos/rA1	PTPRA_798/rA1	CD3159/rA1	LAT2_po5/rA1	CTNND1_649/rA1	DAB1_po2/rA1	SHC1_pos/rA1	CBL_868/rA1
R15	CTLA4_176	SIGLEC10_596	FRS2_471	CD84_261	SHC1_pos	RANBP17_736	PIGM_46	MYO3B_1274	mCD22_777	SCN11A_1586	PTPNS1_po2	GRM7_670	IRS2_822	IL8RB_55	substrate_662	PILRA_245	SIGLEC5_520	GJA1_264	INPP5554	HEXB_329	PDCD1_248	FLT3_pos	GRM2_646	CD22_761	MYPT1_68	TAAR8_215	FLT1_1212	EPOR_488	KLRA7_pos	TIE1_pos	Tom1l1_po3
R16	CTLA4_176/rA1	SIGLEC10_596/rA1	FRS2_471/rA1	CD84_261/rA1	SHC1_pos/rA1	RANBP17_736/rA1	PIGM_46/rA1	MYO3B_1274/rA1	mCD22_777/rA1	SCN11A_1586/rA1	PTPNS1_po2/rA1	GRM7_670/rA1	IRS2_822/rA1	IL8RB_55/rA1	substrate_662/rA1	PILRA_245/rA1	SIGLEC5_520/rA1	GJA1_264/rA1	INPP5554/rA1	HEXB_329/rA1	PDCD1_248/rA1	FLT3_pos/rA1	GRM2_646/rA1	CD22_761/rA1	MYPT1_68/rA1	TAAR8_215/rA1	FLT1_1212/rA1	EPOR_488/rA1	KLRA7_pos/rA1	TIE1_pos/rA1	Tom1l1_po3/rA1
R17	PTPRC_1215	LAT_219	TUBA3_431	CTLA4_176	TIE1_pos	FCGR2B_291	PTPN18_280	JUNB_181	SIGLEC12_565	SCN5A_1753	MS4A2_218	KIT_935	EPOR_453	PTPNS1_po2	substrate_896	PTPN11_278	SIGLEC9_433	KLRA1_pos	IRS1_po11	MCTP2_859	ERBB3_1196	ETV6_313	GRM3_655	PDCD1_248	SIT1_188	SCN11A_1642	LAT_254	PTPN4_323	IFNAR1_465	PAK1_463	CD33_340
R18	PTPRC_1215/rA1	LAT_219/rA1	TUBA3_431/rA1	CTLA4_176/rA1	TIE1_pos/rA1	FCGR2B_291/rA1	PTPN18_280/rA1	JUNB_181/rA1	LILRB4_412/rA1	SCN5A_1753/rA1	MS4A2_218/rA1	KIT_935/rA1	EPOR_453/rA1	PTPNS1_po2/rA1	substrate_896/rA1	PTPN11_278/rA1	SIGLEC9_433/rA1	KLRA1_pos/rA1	IRS1_po11/rA1	MCTP2_859/rA1	ERBB3_1196/rA1	ETV6_313/rA1	GRM3_655/rA1	PDCD1_248/rA1	SIT1_188/rA1	SCN11A_1642/rA1	LAT_254/rA1	PTPN4_323/rA1	IFNAR1_465/rA1	PAK1_463/rA1	CD33_340/rA1
R19	DAB1_po2	FLT3_954	STAT5B_664	PTPRC_1215	PAK1_463	IL4R_712	BCAR1_663	MET_1355	SSTR2_312	PTPN11_579	TEK_896	CD3159	IL2RB_363	MS4A2_218	INSR_999	FASLG_257	CLM1_249	IL2RB_380	LAX1_267	NFAM1_219	WASF3_150	RASA1_618	SIT1_126	ERBB3_1196	MET_680	gp60 SU_po2	LAX1_293	MS4A2_po2	PLCG1_291	GSTP1_198	SIGLEC12_565
R20	DAB1_po2/rA1	FLT3_954/rA1	STAT5B_664/rA1	PTPRC_1215/rA1	PAK1_463/rA1	IL4R_712/rA1	BCAR1_663/rA1	MET_1355/rA1	SSTR2_312/rA1	PTPN11_579/rA1	TEK_896/rA1	CD3159/rA1	IL2RB_363/rA1	MS4A2_218/rA1	INSR_999/rA1	FASLG_257/rA1	CLM1_249/rA1	IL2RB_380/rA1	LAX1_267/rA1	NFAM1_219/rA1	WASF3_150/rA1	RASA1_618/rA1	SIT1_126/rA1	ERBB3_1196/rA1	MET_680/rA1	gp60SU_po2/rA1	LAX1_293/rA1	MS4A2_po2/rA1	PLCG1_291/rA1	GSTP1_198/rA1	SIGLEC12_565/rA1
R21	KLRA7_pos	PILRA_245	CTNND1_649	DAB1_po2	GSTP1_198	SIGLEC10_666	NEDD9_628	LAT2_po1	CMKOR1_314	PTK2_946	LAT2_po4	TAAR8_215	CSF3R_813	TEK_896	RET_1062	PTPRA_294	OR8D1_222	DYRA_po2	LUC7L2_172	F2R_336	IL6R_463	MYO3B_1274	KLRC1_40	WASF3_150	PDGFRB_715	CD22_po4	SPTAN1_2429	FRS3_454	CEACAM1_po1	FRS2_195	SIGLEC5_520
R22	KLRA7_pos/rA1	PILRA_245/rA1	CTNND1_649/rA1	DAB1_po2/rA1	GSTP1_198/rA1	SIGLEC10_666/rA1	NEDD9_628/rA1	LAT2_po1/rA1	CMKOR1_314/rA1	PTK2_946/rA1	LAT2_po4/rA1	TAAR8_215/rA1	CSF3R_813/rA1	TEK_896/rA1	RET_1062/rA1	PTPRA_294/rA1	OR8D1_222/rA1	DYRA_po2/rA1	LUC7L2_172/rA1	F2R_336/rA1	IL6R_463/rA1	MYO3B_1274/rA1	KLRC1_40/rA1	WASF3_150/rA1	PDGFRB_715/rA1	CD22_po4/rA1	SPTAN1_2429/rA1	FRS3_454/rA1	CEACAM1_po1/rA1	FRS2_195/rA1	SIGLEC5_520/rA1
R23	IFNAR1_465	PTPN11_278	EPOR_488	KLRA7_pos	FRS2_195	NFAM1_po1	CD300A_267	LET23_po1	GRM4_667	LAX1_372	SIGLEC12_469	SCN11A_1642	SCN11A_1586	LAT2_po4	IL4R_497	PTPRC_1014	mLILRB4_322	RASA1_614	LET23_po2	PTPN4_68	TREML1_281	JUNB_181	HEXB_329	IL6R_463	RB1_320	HEXB_277	DST_632	CBL_868	SHC1_238	LAT_199	SIGLEC9_433
R24	IFNAR1_465/rA1	PTPN11_278/rA1	EPOR_488/rA1	KLRA7_pos/rA1	FRS2_195/rA1	NFAM1_po1/rA1	CD300A_267/rA1	LET23_po1/rA1	GRM4_667/rA1	LAX1_372/rA1	SIGLEC12_469/rA1	SCN11A_1642/rA1	SCN11A_1586/rA1	LAT2_po4/rA1	IL4R_497/rA1	PTPRC_1014/rA1	mLILRB4_322/rA1	RASA1_614/rA1	LET23_po2/rA1	PTPN4_68/rA1	TREML1_281/rA1	JUNB_181/rA1	HEXB_329/rA1	IL6R_463/rA1	RB1_320/rA1	HEXB_277/rA1	DST_632/rA1	CBL_868/rA1	SHC1_238/rA1	LAT_199/rA1	SIGLEC9_433/rA1
R25	PLCG1_291	FASLG_257	PTPN4_323	IFNAR1_465	LAT_199	XPO7_668	MK10_pos	FLT3_968	GRM7_670	SOC_pos	GPR175_204	gp60 SU_po2	SCN5A_1753	SIGLEC12_469	MCF2_898	ITPR3_1587	CD22_821	SSTR1_225	FLT3_pos	OR51V1_140	GRB7_679_1	MET_1355	MCTP2_859	TREML1_281	IRS4_1015	IRS1_46	SIGLEC10_596	Tom1l1_po3	TRKC_pos	KIT_702	CLM1_249
R26	PLCG1_291/rA1	FASLG_257/rA1	PTPN4_323/rA1	IFNAR1_465/rA1	LAT_199/rA1	XPO7_668/rA1	MK10_pos/rA1	FLT3_968/rA1	GRM7_670/rA1	SOC_pos/rA1	GPR175_204/rA1	gp60SU_po2/rA1	SCN5A_1753/rA1	SIGLEC12_469/rA1	MCF2_898/rA1	ITPR3_1587/rA1	CD22_821/rA1	SSTR1_225/rA1	FLT3_pos/rA1	OR51V1_140/rA1	GRB7_679_1/rA1	MET_1355/rA1	MCTP2_859/rA1	TREML1_281/rA1	IRS4_1015/rA1	IRS1_46/rA1	SIGLEC10_596/rA1	Tom1l1_po3/rA1	TRKC_pos/rA1	KIT_702/rA1	CLM1_249/rA1
R27	CEACAM1_po1	PTPRA_294	MS4A2_po2	PLCG1_291	KIT_702	CEACAM1_492	INSR_1184	EGFR_112	KIT_935	PTPN18_302	FGFR2_555	CD22_po4	PTPN11_579	GPR175_204	FGFR3_551	IRS4_920	RANBP17_667	PDGFRA_571	ETV6_313	LRCH4_676	GRB7_679_2	LAT2_po1	NFAM1_219	GRB7_679_1	LEPR_986	substrate_612	LAT_219	CD33_340	SSTR1_80	CSF1R_923	OR8D1_222
R28	CEACAM1_po1/rA1	PTPRA_294/rA1	MS4A2_po2/rA1	PLCG1_291/rA1	KIT_702/rA1	CEACAM1_492/rA1	INSR_1184/rA1	EGFR_112/rA1	KIT_935/rA1	PTPN18_302/rA1	FGFR2_555/rA1	CD22_po4/rA1	PTPN11_579/rA1	GPR175_204/rA1	FGFR3_551/rA1	IRS4_920/rA1	RANBP17_667/rA1	PDGFRA_571/rA1	ETV6_313/rA1	LRCH4_676/rA1	GRB7_679_2/rA1	LAT2_po1/rA1	NFAM1_219/rA1	GRB7_679_1/rA1	LEPR_986/rA1	substrate_612/rA1	LAT_219/rA1	CD33_340/rA1	SSTR1_80/rA1	CSF1R_923/rA1	OR8D1_222/rA1
R29	SHC1_238	PTPRC_1014	FRS3_454	CEACAM1_po1	CSF1R_923	OR12D2_251	JAK2_pos	PTPRA_798	CD3159	LAT2_po5	FRS2_471	HEXB_277	PTK2_946	FGFR2_555	MAPK3_144	IRS1_895	GCET2_127	SIGLEC6_425	RASA1_618	EPHA2_959	IRS2_822	LET23_po1	F2R_336	GRB7_679_2	IL8RA_46	substrate_632	FLT3_954	SIGLEC12_565	SSTR2_pos	IL1RL1_99	mLILRB4_322
R30	SHC1_238/rA1	PTPRC_1014/rA1	FRS3_454/rA1	CEACAM1_po1/rA1	CSF1R_923/rA1	OR12D2_251/rA1	JAK2_pos/rA1	PTPRA_798/rA1	CD3159/rA1	LAT2_po5/rA1	FRS2_471/rA1	HEXB_277/rA1	PTK2_946/rA1	FGFR2_555/rA1	MAPK3_144/rA1	IRS1_895/rA1	GCET2_127/rA1	SIGLEC6_425/rA1	RASA1_618/rA1	EPHA2_959/rA1	IRS2_822/rA1	LET23_po1/rA1	F2R_336/rA1	GRB7_679_2/rA1	IL8RA_46/rA1	substrate_632/rA1	FLT3_954/rA1	SIGLEC12_565/rA1	SSTR2_pos/rA1	IL1RL1_99/rA1	mLILRB4_322/rA1
R31	TRKC_pos	ITPR3_1587	CBL_868	SHC1_238	IL1RL1_99	GRM2_646	CD22_761	MYPT1_68	TAAR8_215	FLT1_1212	TUBA3_431	IRS1_46	LAX1_372	FRS2_471	CD84_261	SHC1_pos	RANBP17_736	PIGM_46	MYO3B_1274	mCD22_777	EPOR_453	FLT3_968	PTPN4_68	IRS2_822	IL8RB_55	substrate_662	PILRA_245	SIGLEC5_520	GJA1_264	IRS1_47	CD22_821
R32	TRKC_pos/rA1	ITPR3_1587/rA1	CBL_868/rA1	SHC1_238/rA1	IL1RL1_99/rA1	GRM2_646/rA1	CD22_761/rA1	MYPT1_68/rA1	TAAR8_215/rA1	FLT1_1212/rA1	TUBA3_431/rA1	IRS1_46/rA1	LAX1_372/rA1	FRS2_471/rA1	CD84_261/rA1	SHC1_pos/rA1	RANBP17_736/rA1	PIGM_46/rA1	MYO3B_1274/rA1	mCD22_777/rA1	EPOR_453/rA1	FLT3_968/rA1	PTPN4_68/rA1	IRS2_822/rA1	IL8RB_55/rA1	substrate_662/rA1	PILRA_245/rA1	SIGLEC5_520/rA1	GJA1_264/rA1	IRS1_47/rA1	CD22_821/rA1
R33	SSTR1_80	IRS4_920	Tom1l1_po3	TRKC_pos	IRS1_47	GRM3_655	PDCD1_248	SIT1_188	SCN11A_1642	LAT_254	STAT5B_664	substrate_612	SOC_pos	TUBA3_431	CTLA4_176	TIE1_pos	FCGR2B_291	PTPN18_280	JUNB_181	LILRB4_412	IL2RB_363	EGFR_112	OR51V1_140	EPOR_453	PTPNS1_po2	substrate_896	PTPN11_278	SIGLEC9_433	KLRA1_pos	PTPN11_546	RANBP17_667
R34	SSTR1_80/rA1	IRS4_920/rA1	Tom1l1_po3/rA1	TRKC_pos/rA1	IRS1_47/rA1	GRM3_655/rA1	PDCD1_248/rA1	SIT1_188/rA1	SCN11A_1642/rA1	LAT_254/rA1	STAT5B_664/rA1	substrate_612/rA1	SOC_pos/rA1	TUBA3_431/rA1	CTLA4_176/rA1	TIE1_pos/rA1	FCGR2B_291/rA1	PTPN18_280/rA1	JUNB_181/rA1	LILRB4_412/rA1	IL2RB_363/rA1	EGFR_112/rA1	OR51V1_140/rA1	EPOR_453/rA1	PTPNS1_po2/rA1	substrate_896/rA1	PTPN11_278/rA1	SIGLEC9_433/rA1	KLRA1_pos/rA1	PTPN11_546/rA1	RANBP17_667/rA1
R35	SSTR2_pos	IRS1_895	CD33_340	SSTR1_80	PTPN11_546	SIT1_126	ERBB3_1196	MET_680	gp60 SU_po2	LAX1_293	CTNND1_649	substrate_632	PTPN18_302	STAT5B_664	PTPRC_1215	PAK1_463	IL4R_712	BCAR1_663	MET_1355	SSTR2_312	CSF3R_813	PTPRA_798	LRCH4_676	IL2RB_363	MS4A2_218	INSR_999	FASLG_257	CLM1_249	IL2RB_380	EGFR_1137	GCET2_127
R36	SSTR2_pos/rA1	IRS1_895/rA1	CD33_340/rA1	SSTR1_80/rA1	PTPN11_546/rA1	SIT1_126/rA1	ERBB3_1196/rA1	MET_680/rA1	gp60SU_po2/rA1	LAX1_293/rA1	CTNND1_649/rA1	substrate_632/rA1	PTPN18_302/rA1	STAT5B_664/rA1	PTPRC_1215/rA1	PAK1_463/rA1	IL4R_712/rA1	BCAR1_663/rA1	MET_1355/rA1	SSTR2_312/rA1	CSF3R_813/rA1	PTPRA_798/rA1	LRCH4_676/rA1	IL2RB_363/rA1	MS4A2_218/rA1	INSR_999/rA1	FASLG_257/rA1	CLM1_249/rA1	IL2RB_380/rA1	EGFR_1137/rA1	GCET2_127/rA1
R37	GJA1_264	SHC1_pos	SIGLEC12_565	SSTR2_pos	EGFR_1137	KLRC1_40	WASF3_150	PDGFRB_715	CD22_po4	SPTAN1_2429	EPOR_488	substrate_662	LAT2_po5	CTNND1_649	DAB1_po2	GSTP1_198	SIGLEC10_666	NEDD9_628	LAT2_po1	CMKOR1_314	SCN11A_1586	MYPT1_68	EPHA2_959	CSF3R_813	TEK_896	RET_1062	PTPRA_294	OR8D1_222	DYRA_po2	INPP5554	RANBP17_736
R38	GJA1_264/rA1	SHC1_pos/rA1	SIGLEC12_565/rA1	SSTR2_pos/rA1	EGFR_1137/rA1	KLRC1_40/rA1	WASF3_150/rA1	PDGFRB_715/rA1	CD22_po4/rA1	SPTAN1_2429/rA1	EPOR_488/rA1	substrate_662/rA1	LAT2_po5/rA1	CTNND1_649/rA1	DAB1_po2/rA1	GSTP1_198/rA1	SIGLEC10_666/rA1	NEDD9_628/rA1	LAT2_po1/rA1	CMKOR1_314/rA1	SCN11A_1586/rA1	MYPT1_68/rA1	EPHA2_959/rA1	CSF3R_813/rA1	TEK_896/rA1	RET_1062/rA1	PTPRA_294/rA1	OR8D1_222/rA1	DYRA_po2/rA1	INPP5554/rA1	RANBP17_736/rA1
R39	KLRA1_pos	TIE1_pos	SIGLEC5_520	GJA1_264	INPP5554	HEXB_329	IL6R_463	RB1_320	HEXB_277	DST_632	PTPN4_323	substrate_896	FLT1_1212	EPOR_488	KLRA7_pos	FRS2_195	NFAM1_po1	CD300A_267	LET23_po1	GRM4_667	SCN5A_1753	SIT1_188	mCD22_777	SCN11A_1586	LAT2_po4	IL4R_497	PTPRC_1014	mLILRB4_322	RASA1_614	IRS1_po11	FCGR2B_291
R40	KLRA1_pos/rA1	TIE1_pos/rA1	SIGLEC5_520/rA1	GJA1_264/rA1	INPP5554/rA1	HEXB_329/rA1	IL6R_463/rA1	RB1_320/rA1	HEXB_277/rA1	DST_632/rA1	PTPN4_323/rA1	substrate_896/rA1	FLT1_1212/rA1	EPOR_488/rA1	KLRA7_pos/rA1	FRS2_195/rA1	NFAM1_po1/rA1	CD300A_267/rA1	LET23_po1/rA1	GRM4_667/rA1	SCN5A_1753/rA1	SIT1_188/rA1	mCD22_777/rA1	SCN11A_1586/rA1	LAT2_po4/rA1	IL4R_497/rA1	PTPRC_1014/rA1	mLILRB4_322/rA1	RASA1_614/rA1	IRS1_po11/rA1	FCGR2B_291/rA1
R41	IL2RB_380	PAK1_463	SIGLEC9_433	KLRA1_pos	IRS1_po11	MCTP2_859	TREML1_281	IRS4_1015	IRS1_46	SIGLEC10_596	MS4A2_po2	INSR_999	LAT_254	PTPN4_323	IFNAR1_465	LAT_199	XPO7_668	MK10_pos	FLT3_968	GRM7_670	PTPN11_579	MET_680	LILRB4_412	SCN5A_1753	SIGLEC12_469	MCF2_898	ITPR3_1587	CD22_821	SSTR1_225	LAX1_267	IL4R_712
R42	IL2RB_380/rA1	PAK1_463/rA1	SIGLEC9_433/rA1	KLRA1_pos/rA1	IRS1_po11/rA1	MCTP2_859/rA1	TREML1_281/rA1	IRS4_1015/rA1	IRS1_46/rA1	SIGLEC10_596/rA1	MS4A2_po2/rA1	INSR_999/rA1	LAT_254/rA1	PTPN4_323/rA1	IFNAR1_465/rA1	LAT_199/rA1	XPO7_668/rA1	MK10_pos/rA1	FLT3_968/rA1	GRM7_670/rA1	PTPN11_579/rA1	MET_680/rA1	LILRB4_412/rA1	SCN5A_1753/rA1	SIGLEC12_469/rA1	MCF2_898/rA1	ITPR3_1587/rA1	CD22_821/rA1	SSTR1_225/rA1	LAX1_267/rA1	IL4R_712/rA1
R43	A	Grb2_+	CLM1_249	IL2RB_380	LAX1_267	NFAM1_219	GRB7_679_1	LEPR_986	substrate_612	LAT_219	A	Grb2_+	LAX1_293	MS4A2_po2	PLCG1_291	KIT_702	CEACAM1_492	INSR_1184	EGFR_112	KIT_935	A	Grb2_+	SSTR2_312	PTPN11_579	GPR175_204	FGFR3_551	IRS4_920	RANBP17_667	PDGFRA_571	A	Grb2_+
R44	Y	Grb2_neg	CLM1_249/rA1	IL2RB_380/rA1	LAX1_267/rA1	NFAM1_219/rA1	GRB7_679_1/rA1	LEPR_986/rA1	substrate_612/rA1	LAT_219/rA1	Y	Grb2_neg	LAX1_293/rA1	MS4A2_po2/rA1	PLCG1_291/rA1	KIT_702/rA1	CEACAM1_492/rA1	INSR_1184/rA1	EGFR_112/rA1	KIT_935/rA1	Y	Grb2_neg	SSTR2_312/rA1	PTPN11_579/rA1	GPR175_204/rA1	FGFR3_551/rA1	IRS4_920/rA1	RANBP17_667/rA1	PDGFRA_571/rA1	Y	Grb2_neg
R45	pY	Src_+	OR8D1_222	DYRA_po2	LUC7L2_172	F2R_336	GRB7_679_2	IL8RA_46	substrate_632	FLT3_954	pY	Src_+	SPTAN1_2429	FRS3_454	CEACAM1_po1	CSF1R_923	OR12D2_251	JAK2_pos	PTPRA_798	CD3159	pY	Src_+	CMKOR1_314	PTK2_946	FGFR2_555	MAPK3_144	IRS1_895	GCET2_127	SIGLEC6_425	pY	Src_+
R46	HA_+	Src_neg	OR8D1_222/rA1	DYRA_po2/rA1	LUC7L2_172/rA1	F2R_336/rA1	GRB7_679_2/rA1	IL8RA_46/rA1	substrate_632/rA1	FLT3_954/rA1	HA_+	Src_neg	SPTAN1_2429/rA1	FRS3_454/rA1	CEACAM1_po1/rA1	CSF1R_923/rA1	OR12D2_251/rA1	JAK2_pos/rA1	PTPRA_798/rA1	CD3159/rA1	HA_+	Src_neg	CMKOR1_314/rA1	PTK2_946/rA1	FGFR2_555/rA1	MAPK3_144/rA1	IRS1_895/rA1	GCET2_127/rA1	SIGLEC6_425/rA1	HA_+	Src_neg
R47	AFM2+	RASA1_+	mLILRB4_322	RASA1_614	LET23_po2	PTPN4_68	IRS2_822	IL8RB_55	substrate_662	PILRA_245	AFM2+	RASA1_+	DST_632	CBL_868	SHC1_238	IL1RL1_99	GRM2_646	CD22_761	MYPT1_68	TAAR8_215	AFM2+	RASA1_+	GRM4_667	LAX1_372	FRS2_471	CD84_261	SHC1_pos	RANBP17_736	PIGM_46	AFM2+	RASA1_+
R48	CRP	RASA1_Neg	mLILRB4_322/rA1	RASA1_614/rA1	LET23_po2/rA1	PTPN4_68/rA1	IRS2_822/rA1	IL8RB_55/rA1	substrate_662/rA1	PILRA_245/rA1	CRP	RASA1_Neg	DST_632/rA1	CBL_868/rA1	SHC1_238/rA1	IL1RL1_99/rA1	GRM2_646/rA1	CD22_761/rA1	MYPT1_68/rA1	TAAR8_215/rA1	CRP	RASA1_Neg	GRM4_667/rA1	LAX1_372/rA1	FRS2_471/rA1	CD84_261/rA1	SHC1_pos/rA1	RANBP17_736/rA1	PIGM_46/rA1	CRP	RASA1_Neg
R49	DYRA_po2	GSTP1_198	CD22_821	SSTR1_225	FLT3_pos	OR51V1_140	EPOR_453	PTPNS1_po2	substrate_896	PTPN11_278	FRS3_454	RET_1062	SIGLEC10_596	Tom1l1_po3	TRKC_pos	IRS1_47	GRM3_655	PDCD1_248	SIT1_188	SCN11A_1642	PTK2_946	PDGFRB_715	GRM7_670	SOC_pos	TUBA3_431	CTLA4_176	TIE1_pos	FCGR2B_291	PTPN18_280	LUC7L2_172	SIGLEC10_666
R50	DYRA_po2/rA1	GSTP1_198/rA1	CD22_821/rA1	SSTR1_225/rA1	FLT3_pos/rA1	OR51V1_140/rA1	EPOR_453/rA1	PTPNS1_po2/rA1	substrate_896/rA1	PTPN11_278/rA1	FRS3_454/rA1	RET_1062/rA1	SIGLEC10_596/rA1	Tom1l1_po3/rA1	TRKC_pos/rA1	IRS1_47/rA1	GRM3_655/rA1	PDCD1_248/rA1	SIT1_188/rA1	SCN11A_1642/rA1	PTK2_946/rA1	PDGFRB_715/rA1	GRM7_670/rA1	SOC_pos/rA1	TUBA3_431/rA1	CTLA4_176/rA1	TIE1_pos/rA1	FCGR2B_291/rA1	PTPN18_280/rA1	LUC7L2_172/rA1	SIGLEC10_666/rA1
R51	RASA1_614	FRS2_195	RANBP17_667	PDGFRA_571	ETV6_313	LRCH4_676	IL2RB_363	MS4A2_218	INSR_999	FASLG_257	CBL_868	IL4R_497	LAT_219	CD33_340	SSTR1_80	PTPN11_546	SIT1_126	ERBB3_1196	MET_680	gp60 SU_po2	LAX1_372	RB1_320	KIT_935	PTPN18_302	STAT5B_664	PTPRC_1215	PAK1_463	IL4R_712	BCAR1_663	LET23_po2	NFAM1_po1
R52	RASA1_614/rA1	FRS2_195/rA1	RANBP17_667/rA1	PDGFRA_571/rA1	ETV6_313/rA1	LRCH4_676/rA1	IL2RB_363/rA1	MS4A2_218/rA1	INSR_999/rA1	FASLG_257/rA1	CBL_868/rA1	IL4R_497/rA1	LAT_219/rA1	CD33_340/rA1	SSTR1_80/rA1	PTPN11_546/rA1	SIT1_126/rA1	ERBB3_1196/rA1	MET_680/rA1	gp60SU_po2/rA1	LAX1_372/rA1	RB1_320/rA1	KIT_935/rA1	PTPN18_302/rA1	STAT5B_664/rA1	PTPRC_1215/rA1	PAK1_463/rA1	IL4R_712/rA1	BCAR1_663/rA1	LET23_po2/rA1	NFAM1_po1/rA1
R53	SSTR1_225	LAT_199	GCET2_127	SIGLEC6_425	RASA1_618	EPHA2_959	CSF3R_813	TEK_896	RET_1062	PTPRA_294	Tom1l1_po3	MCF2_898	FLT3_954	SIGLEC12_565	SSTR2_pos	EGFR_1137	KLRC1_40	WASF3_150	PDGFRB_715	CD22_po4	SOC_pos	IRS4_1015	CD3159	LAT2_po5	CTNND1_649	DAB1_po2	GSTP1_198	SIGLEC10_666	NEDD9_628	FLT3_pos	XPO7_668
R54	SSTR1_225/rA1	LAT_199/rA1	GCET2_127/rA1	SIGLEC6_425/rA1	RASA1_618/rA1	EPHA2_959/rA1	CSF3R_813/rA1	TEK_896/rA1	RET_1062/rA1	PTPRA_294/rA1	Tom1l1_po3/rA1	MCF2_898/rA1	FLT3_954/rA1	SIGLEC12_565/rA1	SSTR2_pos/rA1	EGFR_1137/rA1	KLRC1_40/rA1	WASF3_150/rA1	PDGFRB_715/rA1	CD22_po4/rA1	SOC_pos/rA1	IRS4_1015/rA1	CD3159/rA1	LAT2_po5/rA1	CTNND1_649/rA1	DAB1_po2/rA1	GSTP1_198/rA1	SIGLEC10_666/rA1	NEDD9_628/rA1	FLT3_pos/rA1	XPO7_668/rA1
R55	PDGFRA_571	KIT_702	RANBP17_736	PIGM_46	MYO3B_1274	mCD22_777	SCN11A_1586	LAT2_po4	IL4R_497	PTPRC_1014	CD33_340	FGFR3_551	PILRA_245	SIGLEC5_520	GJA1_264	INPP5554	HEXB_329	IL6R_463	RB1_320	HEXB_277	PTPN18_302	LEPR_986	TAAR8_215	FLT1_1212	EPOR_488	KLRA7_pos	FRS2_195	NFAM1_po1	CD300A_267	ETV6_313	CEACAM1_492
R56	PDGFRA_571/rA1	KIT_702/rA1	RANBP17_736/rA1	PIGM_46/rA1	MYO3B_1274/rA1	mCD22_777/rA1	SCN11A_1586/rA1	LAT2_po4/rA1	IL4R_497/rA1	PTPRC_1014/rA1	CD33_340/rA1	FGFR3_551/rA1	PILRA_245/rA1	SIGLEC5_520/rA1	GJA1_264/rA1	INPP5554/rA1	HEXB_329/rA1	IL6R_463/rA1	RB1_320/rA1	HEXB_277/rA1	PTPN18_302/rA1	LEPR_986/rA1	TAAR8_215/rA1	FLT1_1212/rA1	EPOR_488/rA1	KLRA7_pos/rA1	FRS2_195/rA1	NFAM1_po1/rA1	CD300A_267/rA1	ETV6_313/rA1	CEACAM1_492/rA1
R57	SIGLEC6_425	CSF1R_923	FCGR2B_291	PTPN18_280	JUNB_181	LILRB4_412	SCN5A_1753	SIGLEC12_469	MCF2_898	ITPR3_1587	SIGLEC12_565	MAPK3_144	PTPN11_278	SIGLEC9_433	KLRA1_pos	IRS1_po11	MCTP2_859	TREML1_281	IRS4_1015	IRS1_46	LAT2_po5	IL8RA_46	SCN11A_1642	LAT_254	PTPN4_323	IFNAR1_465	LAT_199	XPO7_668	MK10_pos	RASA1_618	OR12D2_251
R58	SIGLEC6_425/rA1	CSF1R_923/rA1	FCGR2B_291/rA1	PTPN18_280/rA1	JUNB_181/rA1	LILRB4_412/rA1	SCN5A_1753/rA1	SIGLEC12_469/rA1	MCF2_898/rA1	ITPR3_1587/rA1	SIGLEC12_565/rA1	MAPK3_144/rA1	PTPN11_278/rA1	SIGLEC9_433/rA1	KLRA1_pos/rA1	IRS1_po11/rA1	MCTP2_859/rA1	TREML1_281/rA1	IRS4_1015/rA1	IRS1_46/rA1	LAT2_po5/rA1	IL8RA_46/rA1	SCN11A_1642/rA1	LAT_254/rA1	PTPN4_323/rA1	IFNAR1_465/rA1	LAT_199/rA1	XPO7_668/rA1	MK10_pos/rA1	RASA1_618/rA1	OR12D2_251/rA1
R59	PIGM_46	IL1RL1_99	IL4R_712	BCAR1_663	MET_1355	SSTR2_312	PTPN11_579	GPR175_204	FGFR3_551	IRS4_920	SIGLEC5_520	CD84_261	FASLG_257	CLM1_249	IL2RB_380	LAX1_267	NFAM1_219	GRB7_679_1	LEPR_986	substrate_612	FLT1_1212	IL8RB_55	gp60 SU_po2	LAX1_293	MS4A2_po2	PLCG1_291	KIT_702	CEACAM1_492	INSR_1184	MYO3B_1274	GRM2_646
R60	PIGM_46/rA1	IL1RL1_99/rA1	IL4R_712/rA1	BCAR1_663/rA1	MET_1355/rA1	SSTR2_312/rA1	PTPN11_579/rA1	GPR175_204/rA1	FGFR3_551/rA1	IRS4_920/rA1	SIGLEC5_520/rA1	CD84_261/rA1	FASLG_257/rA1	CLM1_249/rA1	IL2RB_380/rA1	LAX1_267/rA1	NFAM1_219/rA1	GRB7_679_1/rA1	LEPR_986/rA1	substrate_612/rA1	FLT1_1212/rA1	IL8RB_55/rA1	gp60SU_po2/rA1	LAX1_293/rA1	MS4A2_po2/rA1	PLCG1_291/rA1	KIT_702/rA1	CEACAM1_492/rA1	INSR_1184/rA1	MYO3B_1274/rA1	GRM2_646/rA1
R61	PTPN18_280	IRS1_47	SIGLEC10_666	NEDD9_628	LAT2_po1	CMKOR1_314	PTK2_946	FGFR2_555	MAPK3_144	IRS1_895	SIGLEC9_433	CTLA4_176	PTPRA_294	OR8D1_222	DYRA_po2	LUC7L2_172	F2R_336	GRB7_679_2	IL8RA_46	substrate_632	LAT_254	PTPNS1_po2	CD22_po4	SPTAN1_2429	FRS3_454	CEACAM1_po1	CSF1R_923	OR12D2_251	JAK2_pos	JUNB_181	GRM3_655
R62	PTPN18_280/rA1	IRS1_47/rA1	SIGLEC10_666/rA1	NEDD9_628/rA1	LAT2_po1/rA1	CMKOR1_314/rA1	PTK2_946/rA1	FGFR2_555/rA1	MAPK3_144/rA1	IRS1_895/rA1	SIGLEC9_433/rA1	CTLA4_176/rA1	PTPRA_294/rA1	OR8D1_222/rA1	DYRA_po2/rA1	LUC7L2_172/rA1	F2R_336/rA1	GRB7_679_2/rA1	IL8RA_46/rA1	substrate_632/rA1	LAT_254/rA1	PTPNS1_po2/rA1	CD22_po4/rA1	SPTAN1_2429/rA1	FRS3_454/rA1	CEACAM1_po1/rA1	CSF1R_923/rA1	OR12D2_251/rA1	JAK2_pos/rA1	JUNB_181/rA1	GRM3_655/rA1
R63	BCAR1_663	PTPN11_546	NFAM1_po1	CD300A_267	LET23_po1	GRM4_667	LAX1_372	FRS2_471	CD84_261	SHC1_pos	CLM1_249	PTPRC_1215	PTPRC_1014	mLILRB4_322	RASA1_614	LET23_po2	PTPN4_68	IRS2_822	IL8RB_55	substrate_662	LAX1_293	MS4A2_218	HEXB_277	DST_632	CBL_868	SHC1_238	IL1RL1_99	GRM2_646	CD22_761	MET_1355	SIT1_126
R64	BCAR1_663/rA1	PTPN11_546/rA1	NFAM1_po1/rA1	CD300A_267/rA1	LET23_po1/rA1	GRM4_667/rA1	LAX1_372/rA1	FRS2_471/rA1	CD84_261/rA1	SHC1_pos/rA1	CLM1_249/rA1	PTPRC_1215/rA1	PTPRC_1014/rA1	mLILRB4_322/rA1	RASA1_614/rA1	LET23_po2/rA1	PTPN4_68/rA1	IRS2_822/rA1	IL8RB_55/rA1	substrate_662/rA1	LAX1_293/rA1	MS4A2_218/rA1	HEXB_277/rA1	DST_632/rA1	CBL_868/rA1	SHC1_238/rA1	IL1RL1_99/rA1	GRM2_646/rA1	CD22_761/rA1	MET_1355/rA1	SIT1_126/rA1
R65	NEDD9_628	EGFR_1137	XPO7_668	MK10_pos	FLT3_968	GRM7_670	SOC_pos	TUBA3_431	CTLA4_176	TIE1_pos	OR8D1_222	DAB1_po2	ITPR3_1587	CD22_821	SSTR1_225	FLT3_pos	OR51V1_140	EPOR_453	PTPNS1_po2	substrate_896	SPTAN1_2429	TEK_896	IRS1_46	SIGLEC10_596	Tom1l1_po3	TRKC_pos	IRS1_47	GRM3_655	PDCD1_248	LAT2_po1	KLRC1_40
R66	NEDD9_628/rA1	EGFR_1137/rA1	XPO7_668/rA1	MK10_pos/rA1	FLT3_968/rA1	GRM7_670/rA1	SOC_pos/rA1	TUBA3_431/rA1	CTLA4_176/rA1	TIE1_pos/rA1	OR8D1_222/rA1	DAB1_po2/rA1	ITPR3_1587/rA1	CD22_821/rA1	SSTR1_225/rA1	FLT3_pos/rA1	OR51V1_140/rA1	EPOR_453/rA1	PTPNS1_po2/rA1	substrate_896/rA1	SPTAN1_2429/rA1	TEK_896/rA1	IRS1_46/rA1	SIGLEC10_596/rA1	Tom1l1_po3/rA1	TRKC_pos/rA1	IRS1_47/rA1	GRM3_655/rA1	PDCD1_248/rA1	LAT2_po1/rA1	KLRC1_40/rA1
R67	CD300A_267	INPP5554	CEACAM1_492	INSR_1184	EGFR_112	KIT_935	PTPN18_302	STAT5B_664	PTPRC_1215	PAK1_463	mLILRB4_322	KLRA7_pos	IRS4_920	RANBP17_667	PDGFRA_571	ETV6_313	LRCH4_676	IL2RB_363	MS4A2_218	INSR_999	DST_632	LAT2_po4	substrate_612	LAT_219	CD33_340	SSTR1_80	PTPN11_546	SIT1_126	ERBB3_1196	LET23_po1	HEXB_329
R68	CD300A_267/rA1	INPP5554/rA1	CEACAM1_492/rA1	INSR_1184/rA1	EGFR_112/rA1	KIT_935/rA1	PTPN18_302/rA1	STAT5B_664/rA1	PTPRC_1215/rA1	PAK1_463/rA1	mLILRB4_322/rA1	KLRA7_pos/rA1	IRS4_920/rA1	RANBP17_667/rA1	PDGFRA_571/rA1	ETV6_313/rA1	LRCH4_676/rA1	IL2RB_363/rA1	MS4A2_218/rA1	INSR_999/rA1	DST_632/rA1	LAT2_po4/rA1	substrate_612/rA1	LAT_219/rA1	CD33_340/rA1	SSTR1_80/rA1	PTPN11_546/rA1	SIT1_126/rA1	ERBB3_1196/rA1	LET23_po1/rA1	HEXB_329/rA1
R69	MK10_pos	IRS1_po11	OR12D2_251	JAK2_pos	PTPRA_798	CD3159	LAT2_po5	CTNND1_649	DAB1_po2	GSTP1_198	CD22_821	IFNAR1_465	IRS1_895	GCET2_127	SIGLEC6_425	RASA1_618	EPHA2_959	CSF3R_813	TEK_896	RET_1062	SIGLEC10_596	SIGLEC12_469	substrate_632	FLT3_954	SIGLEC12_565	SSTR2_pos	EGFR_1137	KLRC1_40	WASF3_150	FLT3_968	MCTP2_859
R70	MK10_pos/rA1	IRS1_po11/rA1	OR12D2_251/rA1	JAK2_pos/rA1	PTPRA_798/rA1	CD3159/rA1	LAT2_po5/rA1	CTNND1_649/rA1	DAB1_po2/rA1	GSTP1_198/rA1	CD22_821/rA1	IFNAR1_465/rA1	IRS1_895/rA1	GCET2_127/rA1	SIGLEC6_425/rA1	RASA1_618/rA1	EPHA2_959/rA1	CSF3R_813/rA1	TEK_896/rA1	RET_1062/rA1	SIGLEC10_596/rA1	SIGLEC12_469/rA1	substrate_632/rA1	FLT3_954/rA1	SIGLEC12_565/rA1	SSTR2_pos/rA1	EGFR_1137/rA1	KLRC1_40/rA1	WASF3_150/rA1	FLT3_968/rA1	MCTP2_859/rA1
R71	INSR_1184	LAX1_267	GRM2_646	CD22_761	MYPT1_68	TAAR8_215	FLT1_1212	EPOR_488	KLRA7_pos	FRS2_195	RANBP17_667	PLCG1_291	SHC1_pos	RANBP17_736	PIGM_46	MYO3B_1274	mCD22_777	SCN11A_1586	LAT2_po4	IL4R_497	LAT_219	GPR175_204	substrate_662	PILRA_245	SIGLEC5_520	GJA1_264	INPP5554	HEXB_329	IL6R_463	EGFR_112	NFAM1_219
R72	INSR_1184/rA1	LAX1_267/rA1	GRM2_646/rA1	CD22_761/rA1	MYPT1_68/rA1	TAAR8_215/rA1	FLT1_1212/rA1	EPOR_488/rA1	KLRA7_pos/rA1	FRS2_195/rA1	RANBP17_667/rA1	PLCG1_291/rA1	SHC1_pos/rA1	RANBP17_736/rA1	PIGM_46/rA1	MYO3B_1274/rA1	mCD22_777/rA1	SCN11A_1586/rA1	LAT2_po4/rA1	IL4R_497/rA1	LAT_219/rA1	GPR175_204/rA1	substrate_662/rA1	PILRA_245/rA1	SIGLEC5_520/rA1	GJA1_264/rA1	INPP5554/rA1	HEXB_329/rA1	IL6R_463/rA1	EGFR_112/rA1	NFAM1_219/rA1
R73	JAK2_pos	LUC7L2_172	GRM3_655	PDCD1_248	SIT1_188	SCN11A_1642	LAT_254	PTPN4_323	IFNAR1_465	LAT_199	GCET2_127	CEACAM1_po1	TIE1_pos	FCGR2B_291	PTPN18_280	JUNB_181	LILRB4_412	SCN5A_1753	SIGLEC12_469	MCF2_898	FLT3_954	FGFR2_555	substrate_896	PTPN11_278	SIGLEC9_433	KLRA1_pos	IRS1_po11	MCTP2_859	TREML1_281	PTPRA_798	F2R_336
R74	JAK2_pos/rA1	LUC7L2_172/rA1	GRM3_655/rA1	PDCD1_248/rA1	SIT1_188/rA1	SCN11A_1642/rA1	LAT_254/rA1	PTPN4_323/rA1	IFNAR1_465/rA1	LAT_199/rA1	GCET2_127/rA1	CEACAM1_po1/rA1	TIE1_pos/rA1	FCGR2B_291/rA1	PTPN18_280/rA1	JUNB_181/rA1	LILRB4_412/rA1	SCN5A_1753/rA1	SIGLEC12_469/rA1	MCF2_898/rA1	FLT3_954/rA1	FGFR2_555/rA1	substrate_896/rA1	PTPN11_278/rA1	SIGLEC9_433/rA1	KLRA1_pos/rA1	IRS1_po11/rA1	MCTP2_859/rA1	TREML1_281/rA1	PTPRA_798/rA1	F2R_336/rA1
R75	CD22_761	LET23_po2	SIT1_126	ERBB3_1196	MET_680	gp60 SU_po2	LAX1_293	MS4A2_po2	PLCG1_291	KIT_702	RANBP17_736	SHC1_238	PAK1_463	IL4R_712	BCAR1_663	MET_1355	SSTR2_312	PTPN11_579	GPR175_204	FGFR3_551	PILRA_245	FRS2_471	INSR_999	FASLG_257	CLM1_249	IL2RB_380	LAX1_267	NFAM1_219	GRB7_679_1	MYPT1_68	PTPN4_68
R76	CD22_761/rA1	LET23_po2/rA1	SIT1_126/rA1	ERBB3_1196/rA1	MET_680/rA1	gp60SU_po2/rA1	LAX1_293/rA1	MS4A2_po2/rA1	PLCG1_291/rA1	KIT_702/rA1	RANBP17_736/rA1	SHC1_238/rA1	PAK1_463/rA1	IL4R_712/rA1	BCAR1_663/rA1	MET_1355/rA1	SSTR2_312/rA1	PTPN11_579/rA1	GPR175_204/rA1	FGFR3_551/rA1	PILRA_245/rA1	FRS2_471/rA1	INSR_999/rA1	FASLG_257/rA1	CLM1_249/rA1	IL2RB_380/rA1	LAX1_267/rA1	NFAM1_219/rA1	GRB7_679_1/rA1	MYPT1_68/rA1	PTPN4_68/rA1
R77	PDCD1_248	FLT3_pos	KLRC1_40	WASF3_150	PDGFRB_715	CD22_po4	SPTAN1_2429	FRS3_454	CEACAM1_po1	CSF1R_923	FCGR2B_291	TRKC_pos	GSTP1_198	SIGLEC10_666	NEDD9_628	LAT2_po1	CMKOR1_314	PTK2_946	FGFR2_555	MAPK3_144	PTPN11_278	TUBA3_431	RET_1062	PTPRA_294	OR8D1_222	DYRA_po2	LUC7L2_172	F2R_336	GRB7_679_2	SIT1_188	OR51V1_140
R78	PDCD1_248/rA1	FLT3_pos/rA1	KLRC1_40/rA1	WASF3_150/rA1	PDGFRB_715/rA1	CD22_po4/rA1	SPTAN1_2429/rA1	FRS3_454/rA1	CEACAM1_po1/rA1	CSF1R_923/rA1	FCGR2B_291/rA1	TRKC_pos/rA1	GSTP1_198/rA1	SIGLEC10_666/rA1	NEDD9_628/rA1	LAT2_po1/rA1	CMKOR1_314/rA1	PTK2_946/rA1	FGFR2_555/rA1	MAPK3_144/rA1	PTPN11_278/rA1	TUBA3_431/rA1	RET_1062/rA1	PTPRA_294/rA1	OR8D1_222/rA1	DYRA_po2/rA1	LUC7L2_172/rA1	F2R_336/rA1	GRB7_679_2/rA1	SIT1_188/rA1	OR51V1_140/rA1
R79	ERBB3_1196	ETV6_313	HEXB_329	IL6R_463	RB1_320	HEXB_277	DST_632	CBL_868	SHC1_238	IL1RL1_99	IL4R_712	SSTR1_80	FRS2_195	NFAM1_po1	CD300A_267	LET23_po1	GRM4_667	LAX1_372	FRS2_471	CD84_261	FASLG_257	STAT5B_664	IL4R_497	PTPRC_1014	mLILRB4_322	RASA1_614	LET23_po2	PTPN4_68	IRS2_822	MET_680	A
R80	ERBB3_1196/rA1	ETV6_313/rA1	HEXB_329/rA1	IL6R_463/rA1	RB1_320/rA1	HEXB_277/rA1	DST_632/rA1	CBL_868/rA1	SHC1_238/rA1	IL1RL1_99/rA1	IL4R_712/rA1	SSTR1_80/rA1	FRS2_195/rA1	NFAM1_po1/rA1	CD300A_267/rA1	LET23_po1/rA1	GRM4_667/rA1	LAX1_372/rA1	FRS2_471/rA1	CD84_261/rA1	FASLG_257/rA1	STAT5B_664/rA1	IL4R_497/rA1	PTPRC_1014/rA1	mLILRB4_322/rA1	RASA1_614/rA1	LET23_po2/rA1	PTPN4_68/rA1	IRS2_822/rA1	MET_680/rA1	C
R81	WASF3_150	RASA1_618	MCTP2_859	TREML1_281	IRS4_1015	IRS1_46	SIGLEC10_596	Tom1l1_po3	TRKC_pos	IRS1_47	SIGLEC10_666	SSTR2_pos	LAT_199	XPO7_668	MK10_pos	FLT3_968	GRM7_670	SOC_pos	TUBA3_431	CTLA4_176	PTPRA_294	CTNND1_649	MCF2_898	ITPR3_1587	CD22_821	SSTR1_225	FLT3_pos	OR51V1_140	EPOR_453	PDGFRB_715	D
R82	WASF3_150/rA1	RASA1_618/rA1	MCTP2_859/rA1	TREML1_281/rA1	IRS4_1015/rA1	IRS1_46/rA1	SIGLEC10_596/rA1	Tom1l1_po3/rA1	TRKC_pos/rA1	IRS1_47/rA1	SIGLEC10_666/rA1	SSTR2_pos/rA1	LAT_199/rA1	XPO7_668/rA1	MK10_pos/rA1	FLT3_968/rA1	GRM7_670/rA1	SOC_pos/rA1	TUBA3_431/rA1	CTLA4_176/rA1	PTPRA_294/rA1	CTNND1_649/rA1	MCF2_898/rA1	ITPR3_1587/rA1	CD22_821/rA1	SSTR1_225/rA1	FLT3_pos/rA1	OR51V1_140/rA1	EPOR_453/rA1	PDGFRB_715/rA1	E
R83	IL6R_463	MYO3B_1274	NFAM1_219	GRB7_679_1	LEPR_986	substrate_612	LAT_219	CD33_340	SSTR1_80	PTPN11_546	NFAM1_po1	GJA1_264	KIT_702	CEACAM1_492	INSR_1184	EGFR_112	KIT_935	PTPN18_302	STAT5B_664	PTPRC_1215	PTPRC_1014	EPOR_488	FGFR3_551	IRS4_920	RANBP17_667	PDGFRA_571	ETV6_313	LRCH4_676	IL2RB_363	RB1_320	F
R84	IL6R_463/rA1	MYO3B_1274/rA1	NFAM1_219/rA1	GRB7_679_1/rA1	LEPR_986/rA1	substrate_612/rA1	LAT_219/rA1	CD33_340/rA1	SSTR1_80/rA1	PTPN11_546/rA1	NFAM1_po1/rA1	GJA1_264/rA1	KIT_702/rA1	CEACAM1_492/rA1	INSR_1184/rA1	EGFR_112/rA1	KIT_935/rA1	PTPN18_302/rA1	STAT5B_664/rA1	PTPRC_1215/rA1	PTPRC_1014/rA1	EPOR_488/rA1	FGFR3_551/rA1	IRS4_920/rA1	RANBP17_667/rA1	PDGFRA_571/rA1	ETV6_313/rA1	LRCH4_676/rA1	IL2RB_363/rA1	RB1_320/rA1	G
R85	A	Grb2_+	F2R_336	GRB7_679_2	IL8RA_46	substrate_632	FLT3_954	SIGLEC12_565	SSTR2_pos	EGFR_1137	A	Grb2_+	CSF1R_923	OR12D2_251	JAK2_pos	PTPRA_798	CD3159	LAT2_po5	CTNND1_649	DAB1_po2	A	Grb2_+	MAPK3_144	IRS1_895	GCET2_127	SIGLEC6_425	RASA1_618	EPHA2_959	CSF3R_813	A	Grb2_+
R86	Y	Grb2_neg	F2R_336/rA1	GRB7_679_2/rA1	IL8RA_46/rA1	substrate_632/rA1	FLT3_954/rA1	SIGLEC12_565/rA1	SSTR2_pos/rA1	EGFR_1137/rA1	Y	Grb2_neg	CSF1R_923/rA1	OR12D2_251/rA1	JAK2_pos/rA1	PTPRA_798/rA1	CD3159/rA1	LAT2_po5/rA1	CTNND1_649/rA1	DAB1_po2/rA1	Y	Grb2_neg	MAPK3_144/rA1	IRS1_895/rA1	GCET2_127/rA1	SIGLEC6_425/rA1	RASA1_618/rA1	EPHA2_959/rA1	CSF3R_813/rA1	Y	Grb2_neg
R87	pY	Src_+	PTPN4_68	IRS2_822	IL8RB_55	substrate_662	PILRA_245	SIGLEC5_520	GJA1_264	INPP5554	pY	Src_+	IL1RL1_99	GRM2_646	CD22_761	MYPT1_68	TAAR8_215	FLT1_1212	EPOR_488	KLRA7_pos	pY	Src_+	CD84_261	SHC1_pos	RANBP17_736	PIGM_46	MYO3B_1274	mCD22_777	SCN11A_1586	pY	Src_+
R88	HA_+	Src_neg	PTPN4_68/rA1	IRS2_822/rA1	IL8RB_55/rA1	substrate_662/rA1	PILRA_245/rA1	SIGLEC5_520/rA1	GJA1_264/rA1	INPP5554/rA1	HA_+	Src_neg	IL1RL1_99/rA1	GRM2_646/rA1	CD22_761/rA1	MYPT1_68/rA1	TAAR8_215/rA1	FLT1_1212/rA1	EPOR_488/rA1	KLRA7_pos/rA1	HA_+	Src_neg	CD84_261/rA1	SHC1_pos/rA1	RANBP17_736/rA1	PIGM_46/rA1	MYO3B_1274/rA1	mCD22_777/rA1	SCN11A_1586/rA1	HA_+	Src_neg
R89	AFM2+	RASA1_+	OR51V1_140	EPOR_453	PTPNS1_po2	substrate_896	PTPN11_278	SIGLEC9_433	KLRA1_pos	IRS1_po11	AFM2+	RASA1_+	IRS1_47	GRM3_655	PDCD1_248	SIT1_188	SCN11A_1642	LAT_254	PTPN4_323	IFNAR1_465	AFM2+	RASA1_+	CTLA4_176	TIE1_pos	FCGR2B_291	PTPN18_280	JUNB_181	LILRB4_412	SCN5A_1753	AFM2+	RASA1_+
R90	CRP	RASA1_Neg	OR51V1_140/rA1	EPOR_453/rA1	PTPNS1_po2/rA1	substrate_896/rA1	PTPN11_278/rA1	SIGLEC9_433/rA1	KLRA1_pos/rA1	IRS1_po11/rA1	CRP	RASA1_Neg	IRS1_47/rA1	GRM3_655/rA1	PDCD1_248/rA1	SIT1_188/rA1	SCN11A_1642/rA1	LAT_254/rA1	PTPN4_323/rA1	IFNAR1_465/rA1	CRP	RASA1_Neg	CTLA4_176/rA1	TIE1_pos/rA1	FCGR2B_291/rA1	PTPN18_280/rA1	JUNB_181/rA1	LILRB4_412/rA1	SCN5A_1753/rA1	CRP	RASA1_Neg
R91	TREML1_281	JUNB_181	LRCH4_676	IL2RB_363	MS4A2_218	INSR_999	FASLG_257	CLM1_249	IL2RB_380	LAX1_267	XPO7_668	KLRA1_pos	PTPN11_546	SIT1_126	ERBB3_1196	MET_680	gp60 SU_po2	LAX1_293	MS4A2_po2	PLCG1_291	ITPR3_1587	PTPN4_323	PTPRC_1215	PAK1_463	IL4R_712	BCAR1_663	MET_1355	SSTR2_312	PTPN11_579	IRS4_1015	H
R92	TREML1_281/rA1	JUNB_181/rA1	LRCH4_676/rA1	IL2RB_363/rA1	MS4A2_218/rA1	INSR_999/rA1	FASLG_257/rA1	CLM1_249/rA1	IL2RB_380/rA1	LAX1_267/rA1	XPO7_668/rA1	KLRA1_pos/rA1	PTPN11_546/rA1	SIT1_126/rA1	ERBB3_1196/rA1	MET_680/rA1	gp60SU_po2/rA1	LAX1_293/rA1	MS4A2_po2/rA1	PLCG1_291/rA1	ITPR3_1587/rA1	PTPN4_323/rA1	PTPRC_1215/rA1	PAK1_463/rA1	IL4R_712/rA1	BCAR1_663/rA1	MET_1355/rA1	SSTR2_312/rA1	PTPN11_579/rA1	IRS4_1015/rA1	I
R93	GRB7_679_1	MET_1355	EPHA2_959	CSF3R_813	TEK_896	RET_1062	PTPRA_294	OR8D1_222	DYRA_po2	LUC7L2_172	CEACAM1_492	IL2RB_380	EGFR_1137	KLRC1_40	WASF3_150	PDGFRB_715	CD22_po4	SPTAN1_2429	FRS3_454	CEACAM1_po1	IRS4_920	MS4A2_po2	DAB1_po2	GSTP1_198	SIGLEC10_666	NEDD9_628	LAT2_po1	CMKOR1_314	PTK2_946	LEPR_986	K
R94	GRB7_679_1/rA1	MET_1355/rA1	EPHA2_959/rA1	CSF3R_813/rA1	TEK_896/rA1	RET_1062/rA1	PTPRA_294/rA1	OR8D1_222/rA1	DYRA_po2/rA1	LUC7L2_172/rA1	CEACAM1_492/rA1	IL2RB_380/rA1	EGFR_1137/rA1	KLRC1_40/rA1	WASF3_150/rA1	PDGFRB_715/rA1	CD22_po4/rA1	SPTAN1_2429/rA1	FRS3_454/rA1	CEACAM1_po1/rA1	IRS4_920/rA1	MS4A2_po2/rA1	DAB1_po2/rA1	GSTP1_198/rA1	SIGLEC10_666/rA1	NEDD9_628/rA1	LAT2_po1/rA1	CMKOR1_314/rA1	PTK2_946/rA1	LEPR_986/rA1	L
R95	GRB7_679_2	LAT2_po1	mCD22_777	SCN11A_1586	LAT2_po4	IL4R_497	PTPRC_1014	mLILRB4_322	RASA1_614	LET23_po2	OR12D2_251	DYRA_po2	INPP5554	HEXB_329	IL6R_463	RB1_320	HEXB_277	DST_632	CBL_868	SHC1_238	IRS1_895	FRS3_454	KLRA7_pos	FRS2_195	NFAM1_po1	CD300A_267	LET23_po1	GRM4_667	LAX1_372	IL8RA_46	M
R96	GRB7_679_2/rA1	LAT2_po1/rA1	mCD22_777/rA1	SCN11A_1586/rA1	LAT2_po4/rA1	IL4R_497/rA1	PTPRC_1014/rA1	mLILRB4_322/rA1	RASA1_614/rA1	LET23_po2/rA1	OR12D2_251/rA1	DYRA_po2/rA1	INPP5554/rA1	HEXB_329/rA1	IL6R_463/rA1	RB1_320/rA1	HEXB_277/rA1	DST_632/rA1	CBL_868/rA1	SHC1_238/rA1	IRS1_895/rA1	FRS3_454/rA1	KLRA7_pos/rA1	FRS2_195/rA1	NFAM1_po1/rA1	CD300A_267/rA1	LET23_po1/rA1	GRM4_667/rA1	LAX1_372/rA1	IL8RA_46/rA1	N
R97	IRS2_822	LET23_po1	LILRB4_412	SCN5A_1753	SIGLEC12_469	MCF2_898	ITPR3_1587	CD22_821	SSTR1_225	FLT3_pos	GRM2_646	RASA1_614	IRS1_po11	MCTP2_859	TREML1_281	IRS4_1015	IRS1_46	SIGLEC10_596	Tom1l1_po3	TRKC_pos	SHC1_pos	CBL_868	IFNAR1_465	LAT_199	XPO7_668	MK10_pos	FLT3_968	GRM7_670	SOC_pos	IL8RB_55	P
R98	IRS2_822/rA1	LET23_po1/rA1	LILRB4_412/rA1	SCN5A_1753/rA1	SIGLEC12_469/rA1	MCF2_898/rA1	ITPR3_1587/rA1	CD22_821/rA1	SSTR1_225/rA1	FLT3_pos/rA1	GRM2_646/rA1	RASA1_614/rA1	IRS1_po11/rA1	MCTP2_859/rA1	TREML1_281/rA1	IRS4_1015/rA1	IRS1_46/rA1	SIGLEC10_596/rA1	Tom1l1_po3/rA1	TRKC_pos/rA1	SHC1_pos/rA1	CBL_868/rA1	IFNAR1_465/rA1	LAT_199/rA1	XPO7_668/rA1	MK10_pos/rA1	FLT3_968/rA1	GRM7_670/rA1	SOC_pos/rA1	IL8RB_55/rA1	Q
R99	EPOR_453	FLT3_968	SSTR2_312	PTPN11_579	GPR175_204	FGFR3_551	IRS4_920	RANBP17_667	PDGFRA_571	ETV6_313	GRM3_655	SSTR1_225	LAX1_267	NFAM1_219	GRB7_679_1	LEPR_986	substrate_612	LAT_219	CD33_340	SSTR1_80	TIE1_pos	Tom1l1_po3	PLCG1_291	KIT_702	CEACAM1_492	INSR_1184	EGFR_112	KIT_935	PTPN18_302	PTPNS1_po2	R
R100	EPOR_453/rA1	FLT3_968/rA1	SSTR2_312/rA1	PTPN11_579/rA1	GPR175_204/rA1	FGFR3_551/rA1	IRS4_920/rA1	RANBP17_667/rA1	PDGFRA_571/rA1	ETV6_313/rA1	GRM3_655/rA1	SSTR1_225/rA1	LAX1_267/rA1	NFAM1_219/rA1	GRB7_679_1/rA1	LEPR_986/rA1	substrate_612/rA1	LAT_219/rA1	CD33_340/rA1	SSTR1_80/rA1	TIE1_pos/rA1	Tom1l1_po3/rA1	PLCG1_291/rA1	KIT_702/rA1	CEACAM1_492/rA1	INSR_1184/rA1	EGFR_112/rA1	KIT_935/rA1	PTPN18_302/rA1	PTPNS1_po2/rA1	S
R101	IL2RB_363	EGFR_112	CMKOR1_314	PTK2_946	FGFR2_555	MAPK3_144	IRS1_895	GCET2_127	SIGLEC6_425	RASA1_618	SIT1_126	PDGFRA_571	LUC7L2_172	F2R_336	GRB7_679_2	IL8RA_46	substrate_632	FLT3_954	SIGLEC12_565	SSTR2_pos	PAK1_463	CD33_340	CEACAM1_po1	CSF1R_923	OR12D2_251	JAK2_pos	PTPRA_798	CD3159	LAT2_po5	MS4A2_218	T
R102	IL2RB_363/rA1	EGFR_112/rA1	CMKOR1_314/rA1	PTK2_946/rA1	FGFR2_555/rA1	MAPK3_144/rA1	IRS1_895/rA1	GCET2_127/rA1	SIGLEC6_425/rA1	RASA1_618/rA1	SIT1_126/rA1	PDGFRA_571/rA1	LUC7L2_172/rA1	F2R_336/rA1	GRB7_679_2/rA1	IL8RA_46/rA1	substrate_632/rA1	FLT3_954/rA1	SIGLEC12_565/rA1	SSTR2_pos/rA1	PAK1_463/rA1	CD33_340/rA1	CEACAM1_po1/rA1	CSF1R_923/rA1	OR12D2_251/rA1	JAK2_pos/rA1	PTPRA_798/rA1	CD3159/rA1	LAT2_po5/rA1	MS4A2_218/rA1	V
R103	CSF3R_813	PTPRA_798	GRM4_667	LAX1_372	FRS2_471	CD84_261	SHC1_pos	RANBP17_736	PIGM_46	MYO3B_1274	KLRC1_40	SIGLEC6_425	LET23_po2	PTPN4_68	IRS2_822	IL8RB_55	substrate_662	PILRA_245	SIGLEC5_520	GJA1_264	GSTP1_198	SIGLEC12_565	SHC1_238	IL1RL1_99	GRM2_646	CD22_761	MYPT1_68	TAAR8_215	FLT1_1212	TEK_896	W
R104	CSF3R_813/rA1	PTPRA_798/rA1	GRM4_667/rA1	LAX1_372/rA1	FRS2_471/rA1	CD84_261/rA1	SHC1_pos/rA1	RANBP17_736/rA1	PIGM_46/rA1	MYO3B_1274/rA1	KLRC1_40/rA1	SIGLEC6_425/rA1	LET23_po2/rA1	PTPN4_68/rA1	IRS2_822/rA1	IL8RB_55/rA1	substrate_662/rA1	PILRA_245/rA1	SIGLEC5_520/rA1	GJA1_264/rA1	GSTP1_198/rA1	SIGLEC12_565/rA1	SHC1_238/rA1	IL1RL1_99/rA1	GRM2_646/rA1	CD22_761/rA1	MYPT1_68/rA1	TAAR8_215/rA1	FLT1_1212/rA1	TEK_896/rA1	A
R105	SCN11A_1586	MYPT1_68	GRM7_670	SOC_pos	TUBA3_431	CTLA4_176	TIE1_pos	FCGR2B_291	PTPN18_280	JUNB_181	HEXB_329	PIGM_46	FLT3_pos	OR51V1_140	EPOR_453	PTPNS1_po2	substrate_896	PTPN11_278	SIGLEC9_433	KLRA1_pos	FRS2_195	SIGLEC5_520	TRKC_pos	IRS1_47	GRM3_655	PDCD1_248	SIT1_188	SCN11A_1642	LAT_254	LAT2_po4	C
R106	SCN11A_1586/rA1	MYPT1_68/rA1	GRM7_670/rA1	SOC_pos/rA1	TUBA3_431/rA1	CTLA4_176/rA1	TIE1_pos/rA1	FCGR2B_291/rA1	PTPN18_280/rA1	JUNB_181/rA1	HEXB_329/rA1	PIGM_46/rA1	FLT3_pos/rA1	OR51V1_140/rA1	EPOR_453/rA1	PTPNS1_po2/rA1	substrate_896/rA1	PTPN11_278/rA1	SIGLEC9_433/rA1	KLRA1_pos/rA1	FRS2_195/rA1	SIGLEC5_520/rA1	TRKC_pos/rA1	IRS1_47/rA1	GRM3_655/rA1	PDCD1_248/rA1	SIT1_188/rA1	SCN11A_1642/rA1	LAT_254/rA1	LAT2_po4/rA1	D
R107	SCN5A_1753	SIT1_188	KIT_935	PTPN18_302	STAT5B_664	PTPRC_1215	PAK1_463	IL4R_712	BCAR1_663	MET_1355	MCTP2_859	PTPN18_280	ETV6_313	LRCH4_676	IL2RB_363	MS4A2_218	INSR_999	FASLG_257	CLM1_249	IL2RB_380	LAT_199	SIGLEC9_433	SSTR1_80	PTPN11_546	SIT1_126	ERBB3_1196	MET_680	gp60 SU_po2	LAX1_293	SIGLEC12_469	E
R108	SCN5A_1753/rA1	SIT1_188/rA1	KIT_935/rA1	PTPN18_302/rA1	STAT5B_664/rA1	PTPRC_1215/rA1	PAK1_463/rA1	IL4R_712/rA1	BCAR1_663/rA1	MET_1355/rA1	MCTP2_859/rA1	PTPN18_280/rA1	ETV6_313/rA1	LRCH4_676/rA1	IL2RB_363/rA1	MS4A2_218/rA1	INSR_999/rA1	FASLG_257/rA1	CLM1_249/rA1	IL2RB_380/rA1	LAT_199/rA1	SIGLEC9_433/rA1	SSTR1_80/rA1	PTPN11_546/rA1	SIT1_126/rA1	ERBB3_1196/rA1	MET_680/rA1	gp60SU_po2/rA1	LAX1_293/rA1	SIGLEC12_469/rA1	F
R109	PTPN11_579	MET_680	CD3159	LAT2_po5	CTNND1_649	DAB1_po2	GSTP1_198	SIGLEC10_666	NEDD9_628	LAT2_po1	NFAM1_219	BCAR1_663	RASA1_618	EPHA2_959	CSF3R_813	TEK_896	RET_1062	PTPRA_294	OR8D1_222	DYRA_po2	KIT_702	CLM1_249	SSTR2_pos	EGFR_1137	KLRC1_40	WASF3_150	PDGFRB_715	CD22_po4	SPTAN1_2429	GPR175_204	G
R110	PTPN11_579/rA1	MET_680/rA1	CD3159/rA1	LAT2_po5/rA1	CTNND1_649/rA1	DAB1_po2/rA1	GSTP1_198/rA1	SIGLEC10_666/rA1	NEDD9_628/rA1	LAT2_po1/rA1	NFAM1_219/rA1	BCAR1_663/rA1	RASA1_618/rA1	EPHA2_959/rA1	CSF3R_813/rA1	TEK_896/rA1	RET_1062/rA1	PTPRA_294/rA1	OR8D1_222/rA1	DYRA_po2/rA1	KIT_702/rA1	CLM1_249/rA1	SSTR2_pos/rA1	EGFR_1137/rA1	KLRC1_40/rA1	WASF3_150/rA1	PDGFRB_715/rA1	CD22_po4/rA1	SPTAN1_2429/rA1	GPR175_204/rA1	H
R111	PTK2_946	PDGFRB_715	TAAR8_215	FLT1_1212	EPOR_488	KLRA7_pos	FRS2_195	NFAM1_po1	CD300A_267	LET23_po1	F2R_336	NEDD9_628	MYO3B_1274	mCD22_777	SCN11A_1586	LAT2_po4	IL4R_497	PTPRC_1014	mLILRB4_322	RASA1_614	CSF1R_923	OR8D1_222	GJA1_264	INPP5554	HEXB_329	IL6R_463	RB1_320	HEXB_277	DST_632	FGFR2_555	I
R112	PTK2_946/rA1	PDGFRB_715/rA1	TAAR8_215/rA1	FLT1_1212/rA1	EPOR_488/rA1	KLRA7_pos/rA1	FRS2_195/rA1	NFAM1_po1/rA1	CD300A_267/rA1	LET23_po1/rA1	F2R_336/rA1	NEDD9_628/rA1	MYO3B_1274/rA1	mCD22_777/rA1	SCN11A_1586/rA1	LAT2_po4/rA1	IL4R_497/rA1	PTPRC_1014/rA1	mLILRB4_322/rA1	RASA1_614/rA1	CSF1R_923/rA1	OR8D1_222/rA1	GJA1_264/rA1	INPP5554/rA1	HEXB_329/rA1	IL6R_463/rA1	RB1_320/rA1	HEXB_277/rA1	DST_632/rA1	FGFR2_555/rA1	K
R113	LAX1_372	RB1_320	SCN11A_1642	LAT_254	PTPN4_323	IFNAR1_465	LAT_199	XPO7_668	MK10_pos	FLT3_968	PTPN4_68	CD300A_267	JUNB_181	LILRB4_412	SCN5A_1753	SIGLEC12_469	MCF2_898	ITPR3_1587	CD22_821	SSTR1_225	IL1RL1_99	mLILRB4_322	KLRA1_pos	IRS1_po11	MCTP2_859	TREML1_281	IRS4_1015	IRS1_46	SIGLEC10_596	FRS2_471	L
R114	LAX1_372/rA1	RB1_320/rA1	SCN11A_1642/rA1	LAT_254/rA1	PTPN4_323/rA1	IFNAR1_465/rA1	LAT_199/rA1	XPO7_668/rA1	MK10_pos/rA1	FLT3_968/rA1	PTPN4_68/rA1	CD300A_267/rA1	JUNB_181/rA1	LILRB4_412/rA1	SCN5A_1753/rA1	SIGLEC12_469/rA1	MCF2_898/rA1	ITPR3_1587/rA1	CD22_821/rA1	SSTR1_225/rA1	IL1RL1_99/rA1	mLILRB4_322/rA1	KLRA1_pos/rA1	IRS1_po11/rA1	MCTP2_859/rA1	TREML1_281/rA1	IRS4_1015/rA1	IRS1_46/rA1	SIGLEC10_596/rA1	FRS2_471/rA1	M
R115	SOC_pos	IRS4_1015	gp60 SU_po2	LAX1_293	MS4A2_po2	PLCG1_291	KIT_702	CEACAM1_492	INSR_1184	EGFR_112	OR51V1_140	MK10_pos	MET_1355	SSTR2_312	PTPN11_579	GPR175_204	FGFR3_551	IRS4_920	RANBP17_667	PDGFRA_571	IRS1_47	CD22_821	IL2RB_380	LAX1_267	NFAM1_219	GRB7_679_1	LEPR_986	substrate_612	LAT_219	TUBA3_431	N
R116	SOC_pos/rA1	IRS4_1015/rA1	gp60SU_po2/rA1	LAX1_293/rA1	MS4A2_po2/rA1	PLCG1_291/rA1	KIT_702/rA1	CEACAM1_492/rA1	INSR_1184/rA1	EGFR_112/rA1	OR51V1_140/rA1	MK10_pos/rA1	MET_1355/rA1	SSTR2_312/rA1	PTPN11_579/rA1	GPR175_204/rA1	FGFR3_551/rA1	IRS4_920/rA1	RANBP17_667/rA1	PDGFRA_571/rA1	IRS1_47/rA1	CD22_821/rA1	IL2RB_380/rA1	LAX1_267/rA1	NFAM1_219/rA1	GRB7_679_1/rA1	LEPR_986/rA1	substrate_612/rA1	LAT_219/rA1	TUBA3_431/rA1	P
R117	PTPN18_302	LEPR_986	CD22_po4	SPTAN1_2429	FRS3_454	CEACAM1_po1	CSF1R_923	OR12D2_251	JAK2_pos	PTPRA_798	LRCH4_676	INSR_1184	LAT2_po1	CMKOR1_314	PTK2_946	FGFR2_555	MAPK3_144	IRS1_895	GCET2_127	SIGLEC6_425	PTPN11_546	RANBP17_667	DYRA_po2	LUC7L2_172	F2R_336	GRB7_679_2	IL8RA_46	substrate_632	FLT3_954	STAT5B_664	Q
R118	PTPN18_302/rA1	LEPR_986/rA1	CD22_po4/rA1	SPTAN1_2429/rA1	FRS3_454/rA1	CEACAM1_po1/rA1	CSF1R_923/rA1	OR12D2_251/rA1	JAK2_pos/rA1	PTPRA_798/rA1	LRCH4_676/rA1	INSR_1184/rA1	LAT2_po1/rA1	CMKOR1_314/rA1	PTK2_946/rA1	FGFR2_555/rA1	MAPK3_144/rA1	IRS1_895/rA1	GCET2_127/rA1	SIGLEC6_425/rA1	PTPN11_546/rA1	RANBP17_667/rA1	DYRA_po2/rA1	LUC7L2_172/rA1	F2R_336/rA1	GRB7_679_2/rA1	IL8RA_46/rA1	substrate_632/rA1	FLT3_954/rA1	STAT5B_664/rA1	R
R119	LAT2_po5	IL8RA_46	HEXB_277	DST_632	CBL_868	SHC1_238	IL1RL1_99	GRM2_646	CD22_761	MYPT1_68	EPHA2_959	JAK2_pos	LET23_po1	GRM4_667	LAX1_372	FRS2_471	CD84_261	SHC1_pos	RANBP17_736	PIGM_46	EGFR_1137	GCET2_127	RASA1_614	LET23_po2	PTPN4_68	IRS2_822	IL8RB_55	substrate_662	PILRA_245	CTNND1_649	S
R120	LAT2_po5/rA1	IL8RA_46/rA1	HEXB_277/rA1	DST_632/rA1	CBL_868/rA1	SHC1_238/rA1	IL1RL1_99/rA1	GRM2_646/rA1	CD22_761/rA1	MYPT1_68/rA1	EPHA2_959/rA1	JAK2_pos/rA1	LET23_po1/rA1	GRM4_667/rA1	LAX1_372/rA1	FRS2_471/rA1	CD84_261/rA1	SHC1_pos/rA1	RANBP17_736/rA1	PIGM_46/rA1	EGFR_1137/rA1	GCET2_127/rA1	RASA1_614/rA1	LET23_po2/rA1	PTPN4_68/rA1	IRS2_822/rA1	IL8RB_55/rA1	substrate_662/rA1	PILRA_245/rA1	CTNND1_649/rA1	T
R121	FLT1_1212	IL8RB_55	IRS1_46	SIGLEC10_596	Tom1l1_po3	TRKC_pos	IRS1_47	GRM3_655	PDCD1_248	SIT1_188	mCD22_777	CD22_761	FLT3_968	GRM7_670	SOC_pos	TUBA3_431	CTLA4_176	TIE1_pos	FCGR2B_291	PTPN18_280	INPP5554	RANBP17_736	SSTR1_225	FLT3_pos	OR51V1_140	EPOR_453	PTPNS1_po2	substrate_896	PTPN11_278	EPOR_488	V
R122	FLT1_1212/rA1	IL8RB_55/rA1	IRS1_46/rA1	SIGLEC10_596/rA1	Tom1l1_po3/rA1	TRKC_pos/rA1	IRS1_47/rA1	GRM3_655/rA1	PDCD1_248/rA1	SIT1_188/rA1	mCD22_777/rA1	CD22_761/rA1	FLT3_968/rA1	GRM7_670/rA1	SOC_pos/rA1	TUBA3_431/rA1	CTLA4_176/rA1	TIE1_pos/rA1	FCGR2B_291/rA1	PTPN18_280/rA1	INPP5554/rA1	RANBP17_736/rA1	SSTR1_225/rA1	FLT3_pos/rA1	OR51V1_140/rA1	EPOR_453/rA1	PTPNS1_po2/rA1	substrate_896/rA1	PTPN11_278/rA1	EPOR_488/rA1	W
R123	A	Grb2_+	substrate_612	LAT_219	CD33_340	SSTR1_80	PTPN11_546	SIT1_126	ERBB3_1196	MET_680	A	Grb2_+	EGFR_112	KIT_935	PTPN18_302	STAT5B_664	PTPRC_1215	PAK1_463	IL4R_712	BCAR1_663	A	Grb2_+	PDGFRA_571	ETV6_313	LRCH4_676	IL2RB_363	MS4A2_218	INSR_999	FASLG_257	A	Grb2_+
R124	Y	Grb2_neg	substrate_612/rA1	LAT_219/rA1	CD33_340/rA1	SSTR1_80/rA1	PTPN11_546/rA1	SIT1_126/rA1	ERBB3_1196/rA1	MET_680/rA1	Y	Grb2_neg	EGFR_112/rA1	KIT_935/rA1	PTPN18_302/rA1	STAT5B_664/rA1	PTPRC_1215/rA1	PAK1_463/rA1	IL4R_712/rA1	BCAR1_663/rA1	Y	Grb2_neg	PDGFRA_571/rA1	ETV6_313/rA1	LRCH4_676/rA1	IL2RB_363/rA1	MS4A2_218/rA1	INSR_999/rA1	FASLG_257/rA1	Y	Grb2_neg
R125	pY	Src_+	substrate_632	FLT3_954	SIGLEC12_565	SSTR2_pos	EGFR_1137	KLRC1_40	WASF3_150	PDGFRB_715	pY	Src_+	PTPRA_798	CD3159	LAT2_po5	CTNND1_649	DAB1_po2	GSTP1_198	SIGLEC10_666	NEDD9_628	pY	Src_+	SIGLEC6_425	RASA1_618	EPHA2_959	CSF3R_813	TEK_896	RET_1062	PTPRA_294	pY	Src_+
R126	HA_+	Src_neg	substrate_632/rA1	FLT3_954/rA1	SIGLEC12_565/rA1	SSTR2_pos/rA1	EGFR_1137/rA1	KLRC1_40/rA1	WASF3_150/rA1	PDGFRB_715/rA1	HA_+	Src_neg	PTPRA_798/rA1	CD3159/rA1	LAT2_po5/rA1	CTNND1_649/rA1	DAB1_po2/rA1	GSTP1_198/rA1	SIGLEC10_666/rA1	NEDD9_628/rA1	HA_+	Src_neg	SIGLEC6_425/rA1	RASA1_618/rA1	EPHA2_959/rA1	CSF3R_813/rA1	TEK_896/rA1	RET_1062/rA1	PTPRA_294/rA1	HA_+	Src_neg
R127	AFM2+	RASA1_+	substrate_662	PILRA_245	SIGLEC5_520	GJA1_264	INPP5554	HEXB_329	IL6R_463	RB1_320	AFM2+	RASA1_+	MYPT1_68	TAAR8_215	FLT1_1212	EPOR_488	KLRA7_pos	FRS2_195	NFAM1_po1	CD300A_267	AFM2+	RASA1_+	PIGM_46	MYO3B_1274	mCD22_777	SCN11A_1586	LAT2_po4	IL4R_497	PTPRC_1014	AFM2+	RASA1_+
R128	CRP	RASA1_Neg	substrate_662/rA1	PILRA_245/rA1	SIGLEC5_520/rA1	GJA1_264/rA1	INPP5554/rA1	HEXB_329/rA1	IL6R_463/rA1	RB1_320/rA1	CRP	RASA1_Neg	MYPT1_68/rA1	TAAR8_215/rA1	FLT1_1212/rA1	EPOR_488/rA1	KLRA7_pos/rA1	FRS2_195/rA1	NFAM1_po1/rA1	CD300A_267/rA1	CRP	RASA1_Neg	PIGM_46/rA1	MYO3B_1274/rA1	mCD22_777/rA1	SCN11A_1586/rA1	LAT2_po4/rA1	IL4R_497/rA1	PTPRC_1014/rA1	CRP	RASA1_Neg
stop

## Sheet: Data Layout
Reportor ID	Reporter Name	Target_Seq (5' to 3')	Row	Column	Group	Reporter Control Type	Comment
1	Pseudo	A	1	1	LC Control		Custom Sequence
2	Grb2_+	yKNLHL	1	2	LC Control		Custom Sequence
3	mSHPS1_313	yTSLFL	1	3	experimental		PTPN11
4	IRS1_896	yVNIEF	1	4	experimental		IRS1
5	PTPN11_279	yKNILP	1	5	experimental		GRB2
6	SIGLEC9_433	yASLSF	1	6	experimental		PTPN6
7	KLRA1_8	ySTLRF	1	7	experimental		PTPN11,PTPN6
8	IRS1_941	yMKMDL	1	8	experimental		GRB2,PIK3R1
9	MCTP2_859	yAELKL	1	9	experimental		PTPN6
10	TREML1_281	yATVIF	1	10	experimental		PTPN11
11	A	A	1	11	LC Control		Custom Sequence
12	Grb2_+	yKNLHL	1	12	LC Control		Custom Sequence
13	PDCD1_248	yATIVF	1	13	experimental		PTPN11,PTPN6
14	SIT1_188	yANSQP	1	14	experimental		GRB2
15	SCN11A_1643	ySALSD	1	15	experimental		PTPN11,PTPN6
16	LAT_255	yENLQE	1	16	experimental		GRAP,VAV1,PLCG1,GRB2,ZAP70
17	PTPN4_324	yFTLGS	1	17	experimental		PTPN6
18	IFNAR1_466	yVFFPS	1	18	experimental		TYK2,STAT3,STAT2,STAT1
19	LAT_200	yVNVPE	1	19	experimental		GRAP2,GRAP,VAV1,PLCG1,GRB2,ZAP70,PIK3R1
20	XPO7_669	yTALGR	1	20	experimental		PTPN11,PTPN6
21	A	A	1	21	LC Control		Custom Sequence
22	Grb2_+	yKNLHL	1	22	LC Control		Custom Sequence
23	FCGR2B_292	ySLLMH	1	23	experimental		INPP5D,SHC1,PTPN11,PIK3R1,LYN,PTPN6
24	PTPN18_281	yRFLYH	1	24	experimental		TEC
25	JUNB_182	yTNLSS	1	25	experimental		ABL1
26	LILRB4_412	yAQLHS	1	26	experimental		PTPN6
27	SCN5A_1755	yIIISF	1	27	experimental		PTPN11,PTPN6
28	SIG12_588	ySEINI	1	28	experimental		PTPN11,PTPN6
29	MCF2_899	yFYPTY	1	29	experimental		PTPN6
30	A	A	1	30	LC Control		Custom Sequence
31	Grb2_+	yKNLHL	1	31	LC Control		Custom Sequence
32	Y	Y	2	1	LC Control		Custom Sequence
33	Grb2_neg	YKNLHL	2	2	LC Control		Custom Sequence
34	mSHPS1_313/rA1	ATSLFL	2	3	experimental		PTPN11
35	IRS1_896/rA1	AVNIEF	2	4	experimental		IRS1
36	PTPN11_279/rA1	AKNILP	2	5	experimental		GRB2
37	SIGLEC9_433/rA1	AASLSF	2	6	experimental		PTPN6
38	KLRA1_8/rA1	ASTLRF	2	7	experimental		PTPN11,PTPN6
39	IRS1_941/rA1	AMKMDL	2	8	experimental		GRB2,PIK3R1
40	MCTP2_859/rA1	AAELKL	2	9	experimental		PTPN6
41	TREML1_281/rA1	AATVIF	2	10	experimental		PTPN11
42	Y	Y	2	11	LC Control		Custom Sequence
43	Grb2_neg	YKNLHL	2	12	LC Control		Custom Sequence
44	PDCD1_248/rA1	AATIVF	2	13	experimental		PTPN11,PTPN6
45	SIT1_188/rA1	AANSQP	2	14	experimental		GRB2
46	SCN11A_1643/rA1	ASALSD	2	15	experimental		PTPN11,PTPN6
47	LAT_255/rA1	AENLQE	2	16	experimental		GRAP,VAV1,PLCG1,GRB2,ZAP70
48	PTPN4_324/rA1	AFTLGS	2	17	experimental		PTPN6
49	IFNAR1_466/rA1	AVFFPS	2	18	experimental		TYK2,STAT3,STAT2,STAT1
50	LAT_200/rA1	AVNVPE	2	19	experimental		GRAP2,GRAP,VAV1,PLCG1,GRB2,ZAP70,PIK3R1
51	XPO7_669/rA1	ATALGR	2	20	experimental		PTPN11,PTPN6
52	Y	Y	2	21	LC Control		Custom Sequence
53	Grb2_neg	YKNLHL	2	22	LC Control		Custom Sequence
54	FCGR2B_292/rA1	ASLLMH	2	23	experimental		INPP5D,SHC1,PTPN11,PIK3R1,LYN,PTPN6
55	PTPN18_281/rA1	ARFLYH	2	24	experimental		TEC
56	JUNB_182/rA1	ATNLSS	2	25	experimental		ABL1
57	LILRB4_412/rA1	AAQLHS	2	26	experimental		PTPN6
58	SCN5A_1755/rA1	AIIISF	2	27	experimental		PTPN11,PTPN6
59	SIG12_588/rA1	ASEINI	2	28	experimental		PTPN11,PTPN6
60	MCF2_899/rA1	AFYPTY	2	29	experimental		PTPN6
61	Y	Y	2	30	LC Control		Custom Sequence
62	Grb2_neg	YKNLHL	2	31	LC Control		Custom Sequence
63	pY	y	3	1	LC Control		Custom Sequence
64	Src_+	yEEIYL	3	2	LC Control		Custom Sequence
65	FCERB_219	yEELNI	3	3	experimental		SYK,LYN,FES,SHC1
66	INSR_999	yLSASD	3	4	experimental		IRS1
67	TNFL6_258	yVNVSE	3	5	experimental		GRB2
68	CLM1_249	yASLTL	3	6	experimental		INPP5D,PTPN6
69	IL2RB_381	yFTYDP	3	7	experimental		PTPN6
70	LAX1_268	yVNMTG	3	8	experimental		GRB2,PIK3R1
71	NFAM1_220	yTALQR	3	9	experimental		SYK,ZAP70
72	FRYL_680	ySNVF	3	10	experimental		GRB7-SH2a
73	pY	y	3	11	LC Control		Custom Sequence
74	Src_+	yEEIYL	3	12	LC Control		Custom Sequence
75	ERBB3_1197	yEYMNR	3	13	experimental		SHC1,SYK,GRB7,TENC1,PIK3R3,PIK3R2,PIK3R1,RASA1
76	MET_681	yLNSGN	3	14	experimental		GRB2
77	gp60SU_498	ySHLSP	3	15	experimental		SYK
78	LAX1_294	yENVPA	3	16	experimental		GRB2
79	mFCERB_210	yEELNV	3	17	experimental		SRC,SHC1,SYK,FYN,FGR,LCK
80	PLCG1_292	yFFLDE	3	18	experimental		PTPN6
81	KIT_703	yKNLLH	3	19	experimental		GRB2
82	CEACAM1_493	ySTLNF	3	20	experimental		PTPN11,PTPN6
83	pY	y	3	21	LC Control		Custom Sequence
84	Src_+	yEEIYL	3	22	LC Control		Custom Sequence
85	IL4R_713	ySALTC	3	23	experimental		PTPN11,INPP5D,PTPN6,SHC1
86	BCAR1_664	yDYVHL	3	24	experimental		SRC,NCK1,FYN,FES,LCK
87	MET_1356	yVNVKC	3	25	experimental		INPP5D,INPPL1,PTPN11,PLCG1,GRB2,PIK3R1
88	SSTR2_312	yAFLSD	3	26	experimental		PTPN11,PTPN6
89	PTPN11_584	yENVGL	3	27	experimental		PTPN11,GRB2,FYN
90	GPR175_205	ySLVVI	3	28	experimental		PTPN11,PTPN6
91	FGFR3_552	yVLVEY	3	29	experimental		GRB2,SHC1
92	pY	y	3	30	LC Control		Custom Sequence
93	Src_+	yEEIYL	3	31	LC Control		Custom Sequence
94	HA_+	YPYDVPDYA	4	1	LC Control		Custom Sequence
95	Src_neg	YEEIYL	4	2	LC Control		Custom Sequence
96	FCERB_219/rA1	AEELNI	4	3	experimental		SYK,LYN,FES,SHC1
97	INSR_999/rA1	ALSASD	4	4	experimental		IRS1
98	TNFL6_258/rA1	AVNVSE	4	5	experimental		GRB2
99	CLM1_249/rA1	AASLTL	4	6	experimental		INPP5D,PTPN6
100	IL2RB_381/rA1	AFTYDP	4	7	experimental		PTPN6
101	LAX1_268/rA1	AVNMTG	4	8	experimental		GRB2,PIK3R1
102	NFAM1_220/rA1	ATALQR	4	9	experimental		SYK,ZAP70
103	FRYL_680/rA1	ASNVF	4	10	experimental		GRB7-SH2a
104	HA_+	YPYDVPDYA	4	11	LC Control		Custom Sequence
105	Src_neg	YEEIYL	4	12	LC Control		Custom Sequence
106	ERBB3_1197/rA1	AEYMNR	4	13	experimental		SHC1,SYK,GRB7,TENC1,PIK3R3,PIK3R2,PIK3R1,RASA1
107	MET_681/rA1	ALNSGN	4	14	experimental		GRB2
108	gp60SU_498/rA1	ASHLSP	4	15	experimental		SYK
109	LAX1_294/rA1	AENVPA	4	16	experimental		GRB2
110	mFCERB_210/rA1	AEELNV	4	17	experimental		SRC,SHC1,SYK,FYN,FGR,LCK
111	PLCG1_292/rA1	AFFLDE	4	18	experimental		PTPN6
112	KIT_703/rA1	AKNLLH	4	19	experimental		GRB2
113	CEACAM1_493/rA1	ASTLNF	4	20	experimental		PTPN11,PTPN6
114	HA_+	YPYDVPDYA	4	21	LC Control		Custom Sequence
115	Src_neg	YEEIYL	4	22	LC Control		Custom Sequence
116	IL4R_713/rA1	ASALTC	4	23	experimental		PTPN11,INPP5D,PTPN6,SHC1
117	BCAR1_664/rA1	ADYVHL	4	24	experimental		SRC,NCK1,FYN,FES,LCK
118	MET_1356/rA1	AVNVKC	4	25	experimental		INPP5D,INPPL1,PTPN11,PLCG1,GRB2,PIK3R1
119	SSTR2_312/rA1	AAFLSD	4	26	experimental		PTPN11,PTPN6
120	PTPN11_584/rA1	AENVGL	4	27	experimental		PTPN11,GRB2,FYN
121	GPR175_205/rA1	ASLVVI	4	28	experimental		PTPN11,PTPN6
122	FGFR3_552/rA1	AVLVEY	4	29	experimental		GRB2,SHC1
123	HA_+	YPYDVPDYA	4	30	LC Control		Custom Sequence
124	Src_neg	YEEIYL	4	31	LC Control		Custom Sequence
125	AFM2+	DYKDDDDK	5	1	LC Control		Custom Sequence
126	RASA1_+	yMAPYD	5	2	LC Control		Custom Sequence
127	TIE2_897	yLYLAI	5	3	experimental		PTPN11,PIK3R1
128	RET_1062	yGMSDP	5	4	experimental		IRS1
129	PTPRA_295	yINASF	5	5	experimental		GRB2
130	OR8D1_223	ySILHI	5	6	experimental		PTPN6
131	DYRA_219	yYIVHL	5	7	experimental		DYRA_HUMAN
132	LC7L2_173	yRNSMP	5	8	experimental		GRB2
133	PAR1_337	ySFLSH	5	9	experimental		PTPN11,PTPN6
134	FRYL_680	ySNVF	5	10	experimental		GRB7-SH2a
135	AFM2+	DYKDDDDK	5	11	LC Control		Custom Sequence
136	RASA1_+	yMAPYD	5	12	LC Control		Custom Sequence
137	WASF3_151	yTDPSY	5	13	experimental		PIK3R1
138	PDGFRB_716	ySNALP	5	14	experimental		GRB2,GRB7
139	mCD22_837	ySELVQ	5	15	experimental		SYK,PLCG1,PTPN6
140	SPTAN1_2430	yQNLTR	5	16	experimental		GRB2
141	FRS3_455	yAVIDL	5	17	experimental		PTPN11
142	mCEACAM1_488	yTVLNF	5	18	experimental		PTPN11,PTPN6,SHC1
143	CSF1R_923	yANLPS	5	19	experimental		GRB2
144	OR12D2_251	yAPVLF	5	20	experimental		PTPN6
145	AFM2+	DYKDDDDK	5	21	LC Control		Custom Sequence
146	RASA1_+	yMAPYD	5	22	LC Control		Custom Sequence
147	SIG10_667	yATLNF	5	23	experimental		PTPN11,PTPN6
148	CASL_629	yDYVHL	5	24	experimental		SRC,FYN
149	NTAL_233	yVNGEV	5	25	experimental		GRB2
150	CXCR7_315	ySFINR	5	26	experimental		PTPN11,PTPN6
151	FAK1_925	yENVTG	5	27	experimental		SRC,STAT3,SHC1,GRB2,FES,SH3BP2
152	FGFR2_561	yVIVEY	5	28	experimental		PLCG2,PLCG1,GRB2,PTPN11,SHC1
153	MAPK3_145	yFLYQI	5	29	experimental		PTPN6
154	AFM2+	DYKDDDDK	5	30	LC Control		Custom Sequence
155	RASA1_+	yMAPYD	5	31	LC Control		Custom Sequence
156	CRP	WTPPFKTR	6	1	LC Control		Custom Sequence
157	RASA1_Neg	YMAPYD	6	2	LC Control		Custom Sequence
158	TIE2_897/rA1	ALYLAI	6	3	experimental		PTPN11,PIK3R1
159	RET_1062/rA1	AGMSDP	6	4	experimental		IRS1
160	PTPRA_295/rA1	AINASF	6	5	experimental		GRB2
161	OR8D1_223/rA1	ASILHI	6	6	experimental		PTPN6
162	DYRA_219/rA1	AYIVHL	6	7	experimental		DYRA_HUMAN
163	LC7L2_173/rA1	ARNSMP	6	8	experimental		GRB2
164	PAR1_337/rA1	ASFLSH	6	9	experimental		PTPN11,PTPN6
165	FRYL_680/rA1	ASNVF	6	10	experimental		GRB7-SH2a
166	CRP	WTPPFKTR	6	11	LC Control		Custom Sequence
167	RASA1_Neg	YMAPYD	6	12	LC Control		Custom Sequence
168	WASF3_151/rA1	ATDPSY	6	13	experimental		PIK3R1
169	PDGFRB_716/rA1	ASNALP	6	14	experimental		GRB2,GRB7
170	mCD22_837/rA1	ASELVQ	6	15	experimental		SYK,PLCG1,PTPN6
171	SPTAN1_2430/rA1	AQNLTR	6	16	experimental		GRB2
172	FRS3_455/rA1	AAVIDL	6	17	experimental		PTPN11
173	mCEACAM1_488/rA1	ATVLNF	6	18	experimental		PTPN11,PTPN6,SHC1
174	CSF1R_923/rA1	AANLPS	6	19	experimental		GRB2
175	OR12D2_251/rA1	AAPVLF	6	20	experimental		PTPN6
176	CRP	WTPPFKTR	6	21	LC Control		Custom Sequence
177	RASA1_Neg	YMAPYD	6	22	LC Control		Custom Sequence
178	SIG10_667/rA1	AATLNF	6	23	experimental		PTPN11,PTPN6
179	CASL_629/rA1	ADYVHL	6	24	experimental		SRC,FYN
180	NTAL_233/rA1	AVNGEV	6	25	experimental		GRB2
181	CXCR7_315/rA1	ASFINR	6	26	experimental		PTPN11,PTPN6
182	FAK1_925/rA1	AENVTG	6	27	experimental		SRC,STAT3,SHC1,GRB2,FES,SH3BP2
183	FGFR2_561/rA1	AVIVEY	6	28	experimental		PLCG2,PLCG1,GRB2,PTPN11,SHC1
184	MAPK3_145/rA1	AFLYQI	6	29	experimental		PTPN6
185	CRP	WTPPFKTR	6	30	LC Control		Custom Sequence
186	RASA1_Neg	YMAPYD	6	31	LC Control		Custom Sequence
187	MCF2_899	yFYPTY	7	1	experimental		PTPN6
188	LAT_255	yENLQE	7	2	experimental		GRAP,VAV1,PLCG1,GRB2,ZAP70
189	NTAL_95	yENVLI	7	3	experimental		GRB2
190	IL4R_497	yRSFSN	7	4	experimental		IRS1
191	PTPRC_1015	yINASF	7	5	experimental		GRB2
192	mLILRB4_322	yAQLCI	7	6	experimental		PTPN11,INPP5D,PTPN6
193	RASA1_615	yCNIYL	7	7	experimental		GRB2
194	CelLET23_1290	yYNEPH	7	8	experimental		GRB2
195	PTPN4_69	yFGLQL	7	9	experimental		PTPN6
196	IRS2_823	yVLMSS	7	10	experimental		PIK3R1
197	IRS4_1016	yIEVIF	7	11	experimental		PLCG1,PTPN11
198	LILRB4_412	yAQLHS	7	12	experimental		PTPN6
199	IL6R_464	yFFPR	7	13	experimental		PTPN6
200	RB_321	yEEIYL	7	14	experimental		SRC,FYN,LCK,FGR
201	HEXB_277	yARLRG	7	15	experimental		PTPN11,PTPN6
202	DYST_959	yQNVLT	7	16	experimental		GRB2
203	CBL_869	ySYQDI	7	17	experimental		CRKL
204	SHC1_349	yYNDFP	7	18	experimental		GRB2,GRAP2,INPP5D
205	IL1RL1_99	yANVTI	7	19	experimental		GRB2,MATK
206	GRM2_647	ySALLT	7	20	experimental		PTPN6
207	MK10_223	yVVTRY	7	21	experimental		MK10_HUMAN
208	IRS1_941	yMKMDL	7	22	experimental		GRB2,PIK3R1
209	mNFAM1_215	yTSLQR	7	23	experimental		SYK,ZAP70
210	CD300A_267	yASVVF	7	24	experimental		PTPN11,PTPN6
211	EGFR_1110	yHNQPL	7	25	experimental		GRB2
212	GRM4_667	yAALLT	7	26	experimental		PTPN6
213	LAX1_373	yENVLT	7	27	experimental		GRB2
214	FRS2_471	yAVIDI	7	28	experimental		PTPN11
215	CD84_279	yTYIMA	7	29	experimental		SH2D1B,PTPN11,SH2D1A,INPP5D,PTPN6
216	ITPR3_1588	yKNIIE	7	30	experimental		GRB2
217	PTPN4_324	yFTLGS	7	31	experimental		PTPN6
218	MCF2_899/rA1	AFYPTY	8	1	experimental		PTPN6
219	LAT_255/rA1	AENLQE	8	2	experimental		GRAP,VAV1,PLCG1,GRB2,ZAP70
220	NTAL_95/rA1	AENVLI	8	3	experimental		GRB2
221	IL4R_497/rA1	ARSFSN	8	4	experimental		IRS1
222	PTPRC_1015/rA1	AINASF	8	5	experimental		GRB2
223	mLILRB4_322/rA1	AAQLCI	8	6	experimental		PTPN11,INPP5D,PTPN6
224	RASA1_615/rA1	ACNIYL	8	7	experimental		GRB2
225	CelLET23_1290/rA1	AYNEPH	8	8	experimental		GRB2
226	PTPN4_69/rA1	AFGLQL	8	9	experimental		PTPN6
227	IRS2_823/rA1	AVLMSS	8	10	experimental		PIK3R1
228	IRS4_1016/rA1	AIEVIF	8	11	experimental		PLCG1,PTPN11
229	LILRB4_412/rA1	AAQLHS	8	12	experimental		PTPN6
230	IL6R_464/rA1	AFFPR	8	13	experimental		PTPN6
231	RB_321/rA1	AEEIYL	8	14	experimental		SRC,FYN,LCK,FGR
232	HEXB_277/rA1	AARLRG	8	15	experimental		PTPN11,PTPN6
233	DYST_959/rA1	AQNVLT	8	16	experimental		GRB2
234	CBL_869/rA1	ASYQDI	8	17	experimental		CRKL
235	SHC1_349/rA1	AYNDFP	8	18	experimental		GRB2,GRAP2,INPP5D
236	IL1RL1_99/rA1	AANVTI	8	19	experimental		GRB2,MATK
237	GRM2_647/rA1	ASALLT	8	20	experimental		PTPN6
238	MK10_223/rA1	AVVTRY	8	21	experimental		MK10_HUMAN
239	IRS1_941/rA1	AMKMDL	8	22	experimental		GRB2,PIK3R1
240	mNFAM1_215/rA1	ATSLQR	8	23	experimental		SYK,ZAP70
241	CD300A_267/rA1	AASVVF	8	24	experimental		PTPN11,PTPN6
242	EGFR_1110/rA1	AHNQPL	8	25	experimental		GRB2
243	GRM4_667/rA1	AAALLT	8	26	experimental		PTPN6
244	LAX1_373/rA1	AENVLT	8	27	experimental		GRB2
245	FRS2_471/rA1	AAVIDI	8	28	experimental		PTPN11
246	CD84_279/rA1	ATYIMA	8	29	experimental		SH2D1B,PTPN11,SH2D1A,INPP5D,PTPN6
247	ITPR3_1588/rA1	AKNIIE	8	30	experimental		GRB2
248	PTPN4_324/rA1	AFTLGS	8	31	experimental		PTPN6
249	FGFR3_552	yVLVEY	9	1	experimental		GRB2,SHC1
250	LAX1_294	yENVPA	9	2	experimental		GRB2
251	SIG12_588	ySEINI	9	3	experimental		PTPN11,PTPN6
252	MCF2_899	yFYPTY	9	4	experimental		PTPN6
253	ITPR3_1588	yKNIIE	9	5	experimental		GRB2
254	CD22_822	ySELIQ	9	6	experimental		PTPN6
255	SSTR1_226	yTFLMG	9	7	experimental		PTPN11
256	FLT3_768	yENQKR	9	8	experimental		SH3BP2
257	OR51V1_141	ySSILT	9	9	experimental		PTPN6
258	EPOR_454	yLYLVV	9	10	experimental		SYK,STAT5A,CISH,SOCS3,PTPN6
259	LEPR_986	yATLIS	9	11	experimental		PTPN11,CISH,SOCS3
260	SSTR2_312	yAFLSD	9	12	experimental		PTPN11,PTPN6
261	TREML1_281	yATVIF	9	13	experimental		PTPN11
262	IRS4_1016	yIEVIF	9	14	experimental		PLCG1,PTPN11
263	IRS1_46	yYENEK	9	15	experimental		IRS1
264	SIG10_597	yINVVP	9	16	experimental		PTPN11,PTPN6
265	Tom1l1_441	yYEVME	9	17	experimental		PIK3R1
266	TRKC_705	ySTDYY	9	18	experimental		TRKC_HUMAN
267	IRS1_47	yENEKK	9	19	experimental		GRB2,SH3BP2
268	GRM3_656	ySALLT	9	20	experimental		PTPN6
269	INSR_1185	yETDYY	9	21	experimental		APS,PTPN11,SH2B1,GRB14,GRB10
270	LAX1_268	yVNMTG	9	22	experimental		GRB2,PIK3R1
271	XPO7_669	yTALGR	9	23	experimental		PTPN11,PTPN6
272	MK10_223	yVVTRY	9	24	experimental		MK10_HUMAN
273	FLT3_969	yQNRRP	9	25	experimental		GRB2
274	GRM7_670	yAALLT	9	26	experimental		PTPN6
275	SOS1_974	yQNQPY	9	27	experimental		GRB2
276	TUBA3_432	yEEVGV	9	28	experimental		FYN
277	CTLA4_177	ySFLLT	9	29	experimental		PTPN11,FYN
278	IRS4_921	yVNMDF	9	30	experimental		GRB2,PIK3R1
279	mFCERB_210	yEELNV	9	31	experimental		SRC,SHC1,SYK,FYN,FGR,LCK
280	FGFR3_552/rA1	AVLVEY	10	1	experimental		GRB2,SHC1
281	LAX1_294/rA1	AENVPA	10	2	experimental		GRB2
282	SIG12_588/rA1	ASEINI	10	3	experimental		PTPN11,PTPN6
283	MCF2_899/rA1	AFYPTY	10	4	experimental		PTPN6
284	ITPR3_1588/rA1	AKNIIE	10	5	experimental		GRB2
285	CD22_822/rA1	ASELIQ	10	6	experimental		PTPN6
286	SSTR1_226/rA1	ATFLMG	10	7	experimental		PTPN11
287	FLT3_768/rA1	AENQKR	10	8	experimental		SH3BP2
288	OR51V1_141/rA1	ASSILT	10	9	experimental		PTPN6
289	EPOR_454/rA1	ALYLVV	10	10	experimental		SYK,STAT5A,CISH,SOCS3,PTPN6
290	LEPR_986/rA1	AATLIS	10	11	experimental		PTPN11,CISH,SOCS3
291	SSTR2_312/rA1	AAFLSD	10	12	experimental		PTPN11,PTPN6
292	TREML1_281/rA1	AATVIF	10	13	experimental		PTPN11
293	IRS4_1016/rA1	AIEVIF	10	14	experimental		PLCG1,PTPN11
294	IRS1_46/rA1	AYENEK	10	15	experimental		IRS1
295	SIG10_597/rA1	AINVVP	10	16	experimental		PTPN11,PTPN6
296	Tom1l1_441/rA1	AYEVME	10	17	experimental		PIK3R1
297	TRKC_705/rA1	ASTDYY	10	18	experimental		TRKC_HUMAN
298	IRS1_47/rA1	AENEKK	10	19	experimental		GRB2,SH3BP2
299	GRM3_656/rA1	ASALLT	10	20	experimental		PTPN6
300	INSR_1185/rA1	AETDYY	10	21	experimental		APS,PTPN11,SH2B1,GRB14,GRB10
301	LAX1_268/rA1	AVNMTG	10	22	experimental		GRB2,PIK3R1
302	XPO7_669/rA1	ATALGR	10	23	experimental		PTPN11,PTPN6
303	MK10_223/rA1	AVVTRY	10	24	experimental		MK10_HUMAN
304	FLT3_969/rA1	AQNRRP	10	25	experimental		GRB2
305	GRM7_670/rA1	AAALLT	10	26	experimental		PTPN6
306	SOS1_974/rA1	AQNQPY	10	27	experimental		GRB2
307	TUBA3_432/rA1	AEEVGV	10	28	experimental		FYN
308	CTLA4_177/rA1	ASFLLT	10	29	experimental		PTPN11,FYN
309	IRS4_921/rA1	AVNMDF	10	30	experimental		GRB2,PIK3R1
310	mFCERB_210/rA1	AEELNV	10	31	experimental		SRC,SHC1,SYK,FYN,FGR,LCK
311	MAPK3_145	yFLYQI	11	1	experimental		PTPN6
312	SPTAN1_2430	yQNLTR	11	2	experimental		GRB2
313	GPR175_205	ySLVVI	11	3	experimental		PTPN11,PTPN6
314	FGFR3_552	yVLVEY	11	4	experimental		GRB2,SHC1
315	IRS4_921	yVNMDF	11	5	experimental		GRB2,PIK3R1
316	RANBP17_668	yTALTR	11	6	experimental		PTPN6
317	PDGFRA_572	yIYVDP	11	7	experimental		SRC,SHC1,PTPN11,FYN,SLA,STAT5B,PLCG1,PIK3R1,RASA1,YES1
318	ETV6_314	yMNHIM	11	8	experimental		GRB2
319	LRCH4_676	yTRLLG	11	9	experimental		PTPN6
320	IL2RB_364	yFFFHL	11	10	experimental		PTPN6
321	IL8RA_46	yALVFL	11	11	experimental		PTPN6
322	CXCR7_315	ySFINR	11	12	experimental		PTPN11,PTPN6
323	FRYL_680	ySNVF	11	13	experimental		GRB7-SH2a
324	LEPR_986	yATLIS	11	14	experimental		PTPN11,CISH,SOCS3
325	IRS1_612	yMPMSPG	11	15	experimental		IRS1
326	LAT_220	yVNVSQ	11	16	experimental		VAV1,GRB2,PLCG1,GRAP2,PIK3R1
327	CD33_340	yASLNF	11	17	experimental		PTPN11,PTPN6
328	SSTR1_81	yVILRY	11	18	experimental		PTPN11
329	PTPN11_546	yTNIKY	11	19	experimental		PTPN11,GRB2,FYN,SOCS3
330	SIT1_127	yTSLQL	11	20	experimental		PTPN11
331	JAK2_201	yNSVSY	11	21	experimental		PTPN11
332	LC7L2_173	yRNSMP	11	22	experimental		GRB2
333	CEACAM1_493	ySTLNF	11	23	experimental		PTPN11,PTPN6
334	INSR_1185	yETDYY	11	24	experimental		APS,PTPN11,SH2B1,GRB14,GRB10
335	EGFR_113	yENSYA	11	25	experimental		GRB2
336	KIT_936	ySNLAN	11	26	experimental		PLCG1,GRB2,GRB7
337	PTPN18_303	yQNIKE	11	27	experimental		TEC
338	STAT5B_665	yLIYVF	11	28	experimental		PTPN11,PTPN6
339	PTPRC_1216	yQFLYD	11	29	experimental		LCK
340	rIRS1_895	yVNIEF	11	30	experimental		PTPN11,GRB2,PIK3R1
341	FRS3_455	yAVIDL	11	31	experimental		PTPN11
342	MAPK3_145/rA1	AFLYQI	12	1	experimental		PTPN6
343	SPTAN1_2430/rA1	AQNLTR	12	2	experimental		GRB2
344	GPR175_205/rA1	ASLVVI	12	3	experimental		PTPN11,PTPN6
345	FGFR3_552/rA1	AVLVEY	12	4	experimental		GRB2,SHC1
346	IRS4_921/rA1	AVNMDF	12	5	experimental		GRB2,PIK3R1
347	RANBP17_668/rA1	ATALTR	12	6	experimental		PTPN6
348	PDGFRA_572/rA1	AIYVDP	12	7	experimental		SRC,SHC1,PTPN11,FYN,SLA,STAT5B,PLCG1,PIK3R1,RASA1,YES1
349	ETV6_314/rA1	AMNHIM	12	8	experimental		GRB2
350	LRCH4_676/rA1	ATRLLG	12	9	experimental		PTPN6
351	IL2RB_364/rA1	AFFFHL	12	10	experimental		PTPN6
352	IL8RA_46/rA1	AALVFL	12	11	experimental		PTPN6
353	CXCR7_315/rA1	ASFINR	12	12	experimental		PTPN11,PTPN6
354	FRYL_680/rA1	ASNVF	12	13	experimental		GRB7-SH2a
355	LEPR_986/rA1	AATLIS	12	14	experimental		PTPN11,CISH,SOCS3
356	IRS1_612/rA1	AMPMSPG	12	15	experimental		IRS1
357	LAT_220/rA1	AVNVSQ	12	16	experimental		VAV1,GRB2,PLCG1,GRAP2,PIK3R1
358	CD33_340/rA1	AASLNF	12	17	experimental		PTPN11,PTPN6
359	SSTR1_81/rA1	AVILRY	12	18	experimental		PTPN11
360	PTPN11_546/rA1	ATNIKY	12	19	experimental		PTPN11,GRB2,FYN,SOCS3
361	SIT1_127/rA1	ATSLQL	12	20	experimental		PTPN11
362	JAK2_201/rA1	ANSVSY	12	21	experimental		PTPN11
363	LC7L2_173/rA1	ARNSMP	12	22	experimental		GRB2
364	CEACAM1_493/rA1	ASTLNF	12	23	experimental		PTPN11,PTPN6
365	INSR_1185/rA1	AETDYY	12	24	experimental		APS,PTPN11,SH2B1,GRB14,GRB10
366	EGFR_113/rA1	AENSYA	12	25	experimental		GRB2
367	KIT_936/rA1	ASNLAN	12	26	experimental		PLCG1,GRB2,GRB7
368	PTPN18_303/rA1	AQNIKE	12	27	experimental		TEC
369	STAT5B_665/rA1	ALIYVF	12	28	experimental		PTPN11,PTPN6
370	PTPRC_1216/rA1	AQFLYD	12	29	experimental		LCK
371	rIRS1_895/rA1	AVNIEF	12	30	experimental		PTPN11,GRB2,PIK3R1
372	FRS3_455/rA1	AAVIDL	12	31	experimental		PTPN11
373	CD84_279	yTYIMA	13	1	experimental		SH2D1B,PTPN11,SH2D1A,INPP5D,PTPN6
374	DYST_959	yQNVLT	13	2	experimental		GRB2
375	FGFR2_561	yVIVEY	13	3	experimental		PLCG2,PLCG1,GRB2,PTPN11,SHC1
376	MAPK3_145	yFLYQI	13	4	experimental		PTPN6
377	rIRS1_895	yVNIEF	13	5	experimental		PTPN11,GRB2,PIK3R1
378	GCET2_128	ySLLHM	13	6	experimental		PTPN6
379	SIGLEC6_426	yAVLHF	13	7	experimental		PTPN11,PTPN6
380	RASA1_619	yLNSVQ	13	8	experimental		GRB2
381	EPHA2_960	ySLLGL	13	9	experimental		PTPN11
382	CSF3R_787	yENLWF	13	10	experimental		SYK,SH3BP2
383	IL8RB_55	yALVFL	13	11	experimental		PTPN6
384	GRM4_667	yAALLT	13	12	experimental		PTPN6
385	FRYL_680	ySNVF	13	13	experimental		GRB7-SH2a
386	IL8RA_46	yALVFL	13	14	experimental		PTPN6
387	IRS1_632	yMPMSPK	13	15	experimental		IRS1
388	FLT3_955	yQNVDG	13	16	experimental		GRB2
389	SIGLEC12_565	yASLSF	13	17	experimental		PTPN11,PTPN6
390	SSTR2_66	yVILRY	13	18	experimental		PTPN11
391	EGFR_1138	yLNTVQ	13	19	experimental		GRB2,PLCG1,ABL2,PTPN11,RASA1
392	KLRC1_40	yAELNL	13	20	experimental		PTPN11,PTPN6
393	CD22_762	yTTLRF	13	21	experimental		PTPN6
394	CelLET23_1290	yYNEPH	13	22	experimental		GRB2
395	OR12D2_251	yAPVLF	13	23	experimental		PTPN6
396	JAK2_201	yNSVSY	13	24	experimental		PTPN11
397	PTPRA_798	yANFK	13	25	experimental		SRC,GRB2
398	CD3D_160	ySHLGG	13	26	experimental		SYK,SHC1,ZAP70
399	NTAL_136	yQNFSK	13	27	experimental		GRB2
400	CTNND1_656	yELLFQ	13	28	experimental		PTPN6
401	DAB1_198	yQYIVF	13	29	experimental		SRC,FYN
402	SHC1_427	yVNIQN	13	30	experimental		GRB2
403	CBL_869	ySYQDI	13	31	experimental		CRKL
404	CD84_279/rA1	ATYIMA	14	1	experimental		SH2D1B,PTPN11,SH2D1A,INPP5D,PTPN6
405	DYST_959/rA1	AQNVLT	14	2	experimental		GRB2
406	FGFR2_561/rA1	AVIVEY	14	3	experimental		PLCG2,PLCG1,GRB2,PTPN11,SHC1
407	MAPK3_145/rA1	AFLYQI	14	4	experimental		PTPN6
408	rIRS1_895/rA1	AVNIEF	14	5	experimental		PTPN11,GRB2,PIK3R1
409	GCET2_128/rA1	ASLLHM	14	6	experimental		PTPN6
410	SIGLEC6_426/rA1	AAVLHF	14	7	experimental		PTPN11,PTPN6
411	RASA1_619/rA1	ALNSVQ	14	8	experimental		GRB2
412	EPHA2_960/rA1	ASLLGL	14	9	experimental		PTPN11
413	CSF3R_787/rA1	AENLWF	14	10	experimental		SYK,SH3BP2
414	IL8RB_55/rA1	AALVFL	14	11	experimental		PTPN6
415	GRM4_667/rA1	AAALLT	14	12	experimental		PTPN6
416	FRYL_680/rA1	ASNVF	14	13	experimental		GRB7-SH2a
417	IL8RA_46/rA1	AALVFL	14	14	experimental		PTPN6
418	IRS1_632/rA1	AMPMSPK	14	15	experimental		IRS1
419	FLT3_955/rA1	AQNVDG	14	16	experimental		GRB2
420	SIGLEC12_565/rA1	AASLSF	14	17	experimental		PTPN11,PTPN6
421	SSTR2_66/rA1	AVILRY	14	18	experimental		PTPN11
422	EGFR_1138/rA1	ALNTVQ	14	19	experimental		GRB2,PLCG1,ABL2,PTPN11,RASA1
423	KLRC1_40/rA1	AAELNL	14	20	experimental		PTPN11,PTPN6
424	CD22_762/rA1	ATTLRF	14	21	experimental		PTPN6
425	CelLET23_1290/rA1	AYNEPH	14	22	experimental		GRB2
426	OR12D2_251/rA1	AAPVLF	14	23	experimental		PTPN6
427	JAK2_201/rA1	ANSVSY	14	24	experimental		PTPN11
428	PTPRA_798/rA1	AANFK	14	25	experimental		SRC,GRB2
429	CD3D_160/rA1	ASHLGG	14	26	experimental		SYK,SHC1,ZAP70
430	NTAL_136/rA1	AQNFSK	14	27	experimental		GRB2
431	CTNND1_656/rA1	AELLFQ	14	28	experimental		PTPN6
432	DAB1_198/rA1	AQYIVF	14	29	experimental		SRC,FYN
433	SHC1_427/rA1	AVNIQN	14	30	experimental		GRB2
434	CBL_869/rA1	ASYQDI	14	31	experimental		CRKL
435	CTLA4_177	ySFLLT	15	1	experimental		PTPN11,FYN
436	SIG10_597	yINVVP	15	2	experimental		PTPN11,PTPN6
437	FRS2_471	yAVIDI	15	3	experimental		PTPN11
438	CD84_279	yTYIMA	15	4	experimental		SH2D1B,PTPN11,SH2D1A,INPP5D,PTPN6
439	SHC1_427	yVNIQN	15	5	experimental		GRB2
440	RANBP17_737	yTMLFD	15	6	experimental		PTPN6
441	PIGM_47	yTDIDY	15	7	experimental		PTPN6
442	MYO3B_1275	yYNQLN	15	8	experimental		GRB2
443	mCD22_777	yAILRF	15	9	experimental		SYK,PLCG1,PTPN6
444	SCN11A_1587	yIIISF	15	10	experimental		PTPN11,PTPN6
445	mSHPS1_313	yTSLFL	15	11	experimental		PTPN11
446	GRM7_670	yAALLT	15	12	experimental		PTPN6
447	IRS2_823	yVLMSS	15	13	experimental		PIK3R1
448	IL8RB_55	yALVFL	15	14	experimental		PTPN6
449	IRS1_662	yMMMSP	15	15	experimental		IRS1
450	PILRA_246	yENIRN	15	16	experimental		PTPN11,PTPN6
451	SIGLEC5_520	yASLSF	15	17	experimental		PTPN11,PTPN6
452	GJA1_265	yAYFNG	15	18	experimental		SRC
453	SHIP1_556	yMNILR	15	19	experimental		GRB2,INPP5D
454	HEXB_330	ySFLTT	15	20	experimental		PTPN11,PTPN6
455	PDCD1_248	yATIVF	15	21	experimental		PTPN11,PTPN6
456	FLT3_768	yENQKR	15	22	experimental		SH3BP2
457	GRM2_647	ySALLT	15	23	experimental		PTPN6
458	CD22_762	yTTLRF	15	24	experimental		PTPN6
459	MYPT1_68	yANVDG	15	25	experimental		GRB2
460	TAAR8_216	ySKIFL	15	26	experimental		PTPN11,PTPN6
461	FLT1_1213	yVNAFK	15	27	experimental		PTPN11,GRB2,NCK1,PIK3R1
462	EPOR_489	yENSLI	15	28	experimental		LYN,SH3BP2
463	mKLRA7_8	ySTVRF	15	29	experimental		PTPN6
464	TIE1_1117	yVNMSL	15	30	experimental		PIK3R1
465	Tom1l1_441	yYEVME	15	31	experimental		PIK3R1
466	CTLA4_177/rA1	ASFLLT	16	1	experimental		PTPN11,FYN
467	SIG10_597/rA1	AINVVP	16	2	experimental		PTPN11,PTPN6
468	FRS2_471/rA1	AAVIDI	16	3	experimental		PTPN11
469	CD84_279/rA1	ATYIMA	16	4	experimental		SH2D1B,PTPN11,SH2D1A,INPP5D,PTPN6
470	SHC1_427/rA1	AVNIQN	16	5	experimental		GRB2
471	RANBP17_737/rA1	ATMLFD	16	6	experimental		PTPN6
472	PIGM_47/rA1	ATDIDY	16	7	experimental		PTPN6
473	MYO3B_1275/rA1	AYNQLN	16	8	experimental		GRB2
474	mCD22_777/rA1	AAILRF	16	9	experimental		SYK,PLCG1,PTPN6
475	SCN11A_1587/rA1	AIIISF	16	10	experimental		PTPN11,PTPN6
476	mSHPS1_313/rA1	ATSLFL	16	11	experimental		PTPN11
477	GRM7_670/rA1	AAALLT	16	12	experimental		PTPN6
478	IRS2_823/rA1	AVLMSS	16	13	experimental		PIK3R1
479	IL8RB_55/rA1	AALVFL	16	14	experimental		PTPN6
480	IRS1_662/rA1	AMMMSP	16	15	experimental		IRS1
481	PILRA_246/rA1	AENIRN	16	16	experimental		PTPN11,PTPN6
482	SIGLEC5_520/rA1	AASLSF	16	17	experimental		PTPN11,PTPN6
483	GJA1_265/rA1	AAYFNG	16	18	experimental		SRC
484	SHIP1_556/rA1	AMNILR	16	19	experimental		GRB2,INPP5D
485	HEXB_330/rA1	ASFLTT	16	20	experimental		PTPN11,PTPN6
486	PDCD1_248/rA1	AATIVF	16	21	experimental		PTPN11,PTPN6
487	FLT3_768/rA1	AENQKR	16	22	experimental		SH3BP2
488	GRM2_647/rA1	ASALLT	16	23	experimental		PTPN6
489	CD22_762/rA1	ATTLRF	16	24	experimental		PTPN6
490	MYPT1_68/rA1	AANVDG	16	25	experimental		GRB2
491	TAAR8_216/rA1	ASKIFL	16	26	experimental		PTPN11,PTPN6
492	FLT1_1213/rA1	AVNAFK	16	27	experimental		PTPN11,GRB2,NCK1,PIK3R1
493	EPOR_489/rA1	AENSLI	16	28	experimental		LYN,SH3BP2
494	mKLRA7_8/rA1	ASTVRF	16	29	experimental		PTPN6
495	TIE1_1117/rA1	AVNMSL	16	30	experimental		PIK3R1
496	Tom1l1_441/rA1	AYEVME	16	31	experimental		PIK3R1
497	PTPRC_1216	yQFLYD	17	1	experimental		LCK
498	LAT_220	yVNVSQ	17	2	experimental		VAV1,GRB2,PLCG1,GRAP2,PIK3R1
499	TUBA3_432	yEEVGV	17	3	experimental		FYN
500	CTLA4_177	ySFLLT	17	4	experimental		PTPN11,FYN
501	TIE1_1117	yVNMSL	17	5	experimental		PIK3R1
502	FCGR2B_292	ySLLMH	17	6	experimental		INPP5D,SHC1,PTPN11,PIK3R1,LYN,PTPN6
503	PTPN18_281	yRFLYH	17	7	experimental		TEC
504	JUNB_182	yTNLSS	17	8	experimental		ABL1
505	LILRB4_412	yAQLHS	17	9	experimental		PTPN6
506	SCN5A_1755	yIIISF	17	10	experimental		PTPN11,PTPN6
507	FCERB_219	yEELNI	17	11	experimental		SYK,LYN,FES,SHC1
508	KIT_936	ySNLAN	17	12	experimental		PLCG1,GRB2,GRB7
509	EPOR_454	yLYLVV	17	13	experimental		SYK,STAT5A,CISH,SOCS3,PTPN6
510	mSHPS1_313	yTSLFL	17	14	experimental		PTPN11
511	IRS1_896	yVNIEF	17	15	experimental		IRS1
512	PTPN11_279	yKNILP	17	16	experimental		GRB2
513	SIGLEC9_433	yASLSF	17	17	experimental		PTPN6
514	KLRA1_8	ySTLRF	17	18	experimental		PTPN11,PTPN6
515	IRS1_941	yMKMDL	17	19	experimental		GRB2,PIK3R1
516	MCTP2_859	yAELKL	17	20	experimental		PTPN6
517	ERBB3_1197	yEYMNR	17	21	experimental		SHC1,SYK,GRB7,TENC1,PIK3R3,PIK3R2,PIK3R1,RASA1
518	ETV6_314	yMNHIM	17	22	experimental		GRB2
519	GRM3_656	ySALLT	17	23	experimental		PTPN6
520	PDCD1_248	yATIVF	17	24	experimental		PTPN11,PTPN6
521	SIT1_188	yANSQP	17	25	experimental		GRB2
522	SCN11A_1643	ySALSD	17	26	experimental		PTPN11,PTPN6
523	LAT_255	yENLQE	17	27	experimental		GRAP,VAV1,PLCG1,GRB2,ZAP70
524	PTPN4_324	yFTLGS	17	28	experimental		PTPN6
525	IFNAR1_466	yVFFPS	17	29	experimental		TYK2,STAT3,STAT2,STAT1
526	PAK1_464	yLNENP	17	30	experimental		GRB2
527	CD33_340	yASLNF	17	31	experimental		PTPN11,PTPN6
528	PTPRC_1216/rA1	AQFLYD	18	1	experimental		LCK
529	LAT_220/rA1	AVNVSQ	18	2	experimental		VAV1,GRB2,PLCG1,GRAP2,PIK3R1
530	TUBA3_432/rA1	AEEVGV	18	3	experimental		FYN
531	CTLA4_177/rA1	ASFLLT	18	4	experimental		PTPN11,FYN
532	TIE1_1117/rA1	AVNMSL	18	5	experimental		PIK3R1
533	FCGR2B_292/rA1	ASLLMH	18	6	experimental		INPP5D,SHC1,PTPN11,PIK3R1,LYN,PTPN6
534	PTPN18_281/rA1	ARFLYH	18	7	experimental		TEC
535	JUNB_182/rA1	ATNLSS	18	8	experimental		ABL1
536	LILRB4_412/rA1	AAQLHS	18	9	experimental		PTPN6
537	SCN5A_1755/rA1	AIIISF	18	10	experimental		PTPN11,PTPN6
538	FCERB_219/rA1	AEELNI	18	11	experimental		SYK,LYN,FES,SHC1
539	KIT_936/rA1	ASNLAN	18	12	experimental		PLCG1,GRB2,GRB7
540	EPOR_454/rA1	ALYLVV	18	13	experimental		SYK,STAT5A,CISH,SOCS3,PTPN6
541	mSHPS1_313/rA1	ATSLFL	18	14	experimental		PTPN11
542	IRS1_896/rA1	AVNIEF	18	15	experimental		IRS1
543	PTPN11_279/rA1	AKNILP	18	16	experimental		GRB2
544	SIGLEC9_433/rA1	AASLSF	18	17	experimental		PTPN6
545	KLRA1_8/rA1	ASTLRF	18	18	experimental		PTPN11,PTPN6
546	IRS1_941/rA1	AMKMDL	18	19	experimental		GRB2,PIK3R1
547	MCTP2_859/rA1	AAELKL	18	20	experimental		PTPN6
548	ERBB3_1197/rA1	AEYMNR	18	21	experimental		SHC1,SYK,GRB7,TENC1,PIK3R3,PIK3R2,PIK3R1,RASA1
549	ETV6_314/rA1	AMNHIM	18	22	experimental		GRB2
550	GRM3_656/rA1	ASALLT	18	23	experimental		PTPN6
551	PDCD1_248/rA1	AATIVF	18	24	experimental		PTPN11,PTPN6
552	SIT1_188/rA1	AANSQP	18	25	experimental		GRB2
553	SCN11A_1643/rA1	ASALSD	18	26	experimental		PTPN11,PTPN6
554	LAT_255/rA1	AENLQE	18	27	experimental		GRAP,VAV1,PLCG1,GRB2,ZAP70
555	PTPN4_324/rA1	AFTLGS	18	28	experimental		PTPN6
556	IFNAR1_466/rA1	AVFFPS	18	29	experimental		TYK2,STAT3,STAT2,STAT1
557	PAK1_464/rA1	ALNENP	18	30	experimental		GRB2
558	CD33_340/rA1	AASLNF	18	31	experimental		PTPN11,PTPN6
559	DAB1_198	yQYIVF	19	1	experimental		SRC,FYN
560	FLT3_955	yQNVDG	19	2	experimental		GRB2
561	STAT5B_665	yLIYVF	19	3	experimental		PTPN11,PTPN6
562	PTPRC_1216	yQFLYD	19	4	experimental		LCK
563	PAK1_464	yLNENP	19	5	experimental		GRB2
564	IL4R_713	ySALTC	19	6	experimental		PTPN11,INPP5D,PTPN6,SHC1
565	BCAR1_664	yDYVHL	19	7	experimental		SRC,NCK1,FYN,FES,LCK
566	MET_1356	yVNVKC	19	8	experimental		INPP5D,INPPL1,PTPN11,PLCG1,GRB2,PIK3R1
567	SSTR2_312	yAFLSD	19	9	experimental		PTPN11,PTPN6
568	PTPN11_584	yENVGL	19	10	experimental		PTPN11,GRB2,FYN
569	TIE2_897	yLYLAI	19	11	experimental		PTPN11,PIK3R1
570	CD3D_160	ySHLGG	19	12	experimental		SYK,SHC1,ZAP70
571	IL2RB_364	yFFFHL	19	13	experimental		PTPN6
572	FCERB_219	yEELNI	19	14	experimental		SYK,LYN,FES,SHC1
573	INSR_999	yLSASD	19	15	experimental		IRS1
574	TNFL6_258	yVNVSE	19	16	experimental		GRB2
575	CLM1_249	yASLTL	19	17	experimental		INPP5D,PTPN6
576	IL2RB_381	yFTYDP	19	18	experimental		PTPN6
577	LAX1_268	yVNMTG	19	19	experimental		GRB2,PIK3R1
578	NFAM1_220	yTALQR	19	20	experimental		SYK,ZAP70
579	WASF3_151	yTDPSY	19	21	experimental		PIK3R1
580	RASA1_619	yLNSVQ	19	22	experimental		GRB2
581	SIT1_127	yTSLQL	19	23	experimental		PTPN11
582	ERBB3_1197	yEYMNR	19	24	experimental		SHC1,SYK,GRB7,TENC1,PIK3R3,PIK3R2,PIK3R1,RASA1
583	MET_681	yLNSGN	19	25	experimental		GRB2
584	gp60SU_498	ySHLSP	19	26	experimental		SYK
585	LAX1_294	yENVPA	19	27	experimental		GRB2
586	mFCERB_210	yEELNV	19	28	experimental		SRC,SHC1,SYK,FYN,FGR,LCK
587	PLCG1_292	yFFLDE	19	29	experimental		PTPN6
588	GSTP1_199	yVNLPI	19	30	experimental		GRB2
589	SIGLEC12_565	yASLSF	19	31	experimental		PTPN11,PTPN6
590	DAB1_198/rA1	AQYIVF	20	1	experimental		SRC,FYN
591	FLT3_955/rA1	AQNVDG	20	2	experimental		GRB2
592	STAT5B_665/rA1	ALIYVF	20	3	experimental		PTPN11,PTPN6
593	PTPRC_1216/rA1	AQFLYD	20	4	experimental		LCK
594	PAK1_464/rA1	ALNENP	20	5	experimental		GRB2
595	IL4R_713/rA1	ASALTC	20	6	experimental		PTPN11,INPP5D,PTPN6,SHC1
596	BCAR1_664/rA1	ADYVHL	20	7	experimental		SRC,NCK1,FYN,FES,LCK
597	MET_1356/rA1	AVNVKC	20	8	experimental		INPP5D,INPPL1,PTPN11,PLCG1,GRB2,PIK3R1
598	SSTR2_312/rA1	AAFLSD	20	9	experimental		PTPN11,PTPN6
599	PTPN11_584/rA1	AENVGL	20	10	experimental		PTPN11,GRB2,FYN
600	TIE2_897/rA1	ALYLAI	20	11	experimental		PTPN11,PIK3R1
601	CD3D_160/rA1	ASHLGG	20	12	experimental		SYK,SHC1,ZAP70
602	IL2RB_364/rA1	AFFFHL	20	13	experimental		PTPN6
603	FCERB_219/rA1	AEELNI	20	14	experimental		SYK,LYN,FES,SHC1
604	INSR_999/rA1	ALSASD	20	15	experimental		IRS1
605	TNFL6_258/rA1	AVNVSE	20	16	experimental		GRB2
606	CLM1_249/rA1	AASLTL	20	17	experimental		INPP5D,PTPN6
607	IL2RB_381/rA1	AFTYDP	20	18	experimental		PTPN6
608	LAX1_268/rA1	AVNMTG	20	19	experimental		GRB2,PIK3R1
609	NFAM1_220/rA1	ATALQR	20	20	experimental		SYK,ZAP70
610	WASF3_151/rA1	ATDPSY	20	21	experimental		PIK3R1
611	RASA1_619/rA1	ALNSVQ	20	22	experimental		GRB2
612	SIT1_127/rA1	ATSLQL	20	23	experimental		PTPN11
613	ERBB3_1197/rA1	AEYMNR	20	24	experimental		SHC1,SYK,GRB7,TENC1,PIK3R3,PIK3R2,PIK3R1,RASA1
614	MET_681/rA1	ALNSGN	20	25	experimental		GRB2
615	gp60SU_498/rA1	ASHLSP	20	26	experimental		SYK
616	LAX1_294/rA1	AENVPA	20	27	experimental		GRB2
617	mFCERB_210/rA1	AEELNV	20	28	experimental		SRC,SHC1,SYK,FYN,FGR,LCK
618	PLCG1_292/rA1	AFFLDE	20	29	experimental		PTPN6
619	GSTP1_199/rA1	AVNLPI	20	30	experimental		GRB2
620	SIGLEC12_565/rA1	AASLSF	20	31	experimental		PTPN11,PTPN6
621	mKLRA7_8	ySTVRF	21	1	experimental		PTPN6
622	PILRA_246	yENIRN	21	2	experimental		PTPN11,PTPN6
623	CTNND1_656	yELLFQ	21	3	experimental		PTPN6
624	DAB1_198	yQYIVF	21	4	experimental		SRC,FYN
625	GSTP1_199	yVNLPI	21	5	experimental		GRB2
626	SIG10_667	yATLNF	21	6	experimental		PTPN11,PTPN6
627	CASL_629	yDYVHL	21	7	experimental		SRC,FYN
628	NTAL_233	yVNGEV	21	8	experimental		GRB2
629	CXCR7_315	ySFINR	21	9	experimental		PTPN11,PTPN6
630	FAK1_925	yENVTG	21	10	experimental		SRC,STAT3,SHC1,GRB2,FES,SH3BP2
631	NTAL_95	yENVLI	21	11	experimental		GRB2
632	TAAR8_216	ySKIFL	21	12	experimental		PTPN11,PTPN6
633	CSF3R_787	yENLWF	21	13	experimental		SYK,SH3BP2
634	TIE2_897	yLYLAI	21	14	experimental		PTPN11,PIK3R1
635	RET_1062	yGMSDP	21	15	experimental		IRS1
636	PTPRA_295	yINASF	21	16	experimental		GRB2
637	OR8D1_223	ySILHI	21	17	experimental		PTPN6
638	DYRA_219	yYIVHL	21	18	experimental		DYRA_HUMAN
639	LC7L2_173	yRNSMP	21	19	experimental		GRB2
640	PAR1_337	ySFLSH	21	20	experimental		PTPN11,PTPN6
641	IL6R_464	yFFPR	21	21	experimental		PTPN6
642	MYO3B_1275	yYNQLN	21	22	experimental		GRB2
643	KLRC1_40	yAELNL	21	23	experimental		PTPN11,PTPN6
644	WASF3_151	yTDPSY	21	24	experimental		PIK3R1
645	PDGFRB_716	ySNALP	21	25	experimental		GRB2,GRB7
646	mCD22_837	ySELVQ	21	26	experimental		SYK,PLCG1,PTPN6
647	SPTAN1_2430	yQNLTR	21	27	experimental		GRB2
648	FRS3_455	yAVIDL	21	28	experimental		PTPN11
649	mCEACAM1_488	yTVLNF	21	29	experimental		PTPN11,PTPN6,SHC1
650	FRS2_196	yVNTTG	21	30	experimental		GRB2
651	SIGLEC5_520	yASLSF	21	31	experimental		PTPN11,PTPN6
652	mKLRA7_8/rA1	ASTVRF	22	1	experimental		PTPN6
653	PILRA_246/rA1	AENIRN	22	2	experimental		PTPN11,PTPN6
654	CTNND1_656/rA1	AELLFQ	22	3	experimental		PTPN6
655	DAB1_198/rA1	AQYIVF	22	4	experimental		SRC,FYN
656	GSTP1_199/rA1	AVNLPI	22	5	experimental		GRB2
657	SIG10_667/rA1	AATLNF	22	6	experimental		PTPN11,PTPN6
658	CASL_629/rA1	ADYVHL	22	7	experimental		SRC,FYN
659	NTAL_233/rA1	AVNGEV	22	8	experimental		GRB2
660	CXCR7_315/rA1	ASFINR	22	9	experimental		PTPN11,PTPN6
661	FAK1_925/rA1	AENVTG	22	10	experimental		SRC,STAT3,SHC1,GRB2,FES,SH3BP2
662	NTAL_95/rA1	AENVLI	22	11	experimental		GRB2
663	TAAR8_216/rA1	ASKIFL	22	12	experimental		PTPN11,PTPN6
664	CSF3R_787/rA1	AENLWF	22	13	experimental		SYK,SH3BP2
665	TIE2_897/rA1	ALYLAI	22	14	experimental		PTPN11,PIK3R1
666	RET_1062/rA1	AGMSDP	22	15	experimental		IRS1
667	PTPRA_295/rA1	AINASF	22	16	experimental		GRB2
668	OR8D1_223/rA1	ASILHI	22	17	experimental		PTPN6
669	DYRA_219/rA1	AYIVHL	22	18	experimental		DYRA_HUMAN
670	LC7L2_173/rA1	ARNSMP	22	19	experimental		GRB2
671	PAR1_337/rA1	ASFLSH	22	20	experimental		PTPN11,PTPN6
672	IL6R_464/rA1	AFFPR	22	21	experimental		PTPN6
673	MYO3B_1275/rA1	AYNQLN	22	22	experimental		GRB2
674	KLRC1_40/rA1	AAELNL	22	23	experimental		PTPN11,PTPN6
675	WASF3_151/rA1	ATDPSY	22	24	experimental		PIK3R1
676	PDGFRB_716/rA1	ASNALP	22	25	experimental		GRB2,GRB7
677	mCD22_837/rA1	ASELVQ	22	26	experimental		SYK,PLCG1,PTPN6
678	SPTAN1_2430/rA1	AQNLTR	22	27	experimental		GRB2
679	FRS3_455/rA1	AAVIDL	22	28	experimental		PTPN11
680	mCEACAM1_488/rA1	ATVLNF	22	29	experimental		PTPN11,PTPN6,SHC1
681	FRS2_196/rA1	AVNTTG	22	30	experimental		GRB2
682	SIGLEC5_520/rA1	AASLSF	22	31	experimental		PTPN11,PTPN6
683	IFNAR1_466	yVFFPS	23	1	experimental		TYK2,STAT3,STAT2,STAT1
684	PTPN11_279	yKNILP	23	2	experimental		GRB2
685	EPOR_489	yENSLI	23	3	experimental		LYN,SH3BP2
686	mKLRA7_8	ySTVRF	23	4	experimental		PTPN6
687	FRS2_196	yVNTTG	23	5	experimental		GRB2
688	mNFAM1_215	yTSLQR	23	6	experimental		SYK,ZAP70
689	CD300A_267	yASVVF	23	7	experimental		PTPN11,PTPN6
690	EGFR_1110	yHNQPL	23	8	experimental		GRB2
691	GRM4_667	yAALLT	23	9	experimental		PTPN6
692	LAX1_373	yENVLT	23	10	experimental		GRB2
693	SIG12_588	ySEINI	23	11	experimental		PTPN11,PTPN6
694	SCN11A_1643	ySALSD	23	12	experimental		PTPN11,PTPN6
695	SCN11A_1587	yIIISF	23	13	experimental		PTPN11,PTPN6
696	NTAL_95	yENVLI	23	14	experimental		GRB2
697	IL4R_497	yRSFSN	23	15	experimental		IRS1
698	PTPRC_1015	yINASF	23	16	experimental		GRB2
699	mLILRB4_322	yAQLCI	23	17	experimental		PTPN11,INPP5D,PTPN6
700	RASA1_615	yCNIYL	23	18	experimental		GRB2
701	CelLET23_1290	yYNEPH	23	19	experimental		GRB2
702	PTPN4_69	yFGLQL	23	20	experimental		PTPN6
703	TREML1_281	yATVIF	23	21	experimental		PTPN11
704	JUNB_182	yTNLSS	23	22	experimental		ABL1
705	HEXB_330	ySFLTT	23	23	experimental		PTPN11,PTPN6
706	IL6R_464	yFFPR	23	24	experimental		PTPN6
707	RB_321	yEEIYL	23	25	experimental		SRC,FYN,LCK,FGR
708	HEXB_277	yARLRG	23	26	experimental		PTPN11,PTPN6
709	DYST_959	yQNVLT	23	27	experimental		GRB2
710	CBL_869	ySYQDI	23	28	experimental		CRKL
711	SHC1_349	yYNDFP	23	29	experimental		GRB2,GRAP2,INPP5D
712	LAT_200	yVNVPE	23	30	experimental		GRAP2,GRAP,VAV1,PLCG1,GRB2,ZAP70,PIK3R1
713	SIGLEC9_433	yASLSF	23	31	experimental		PTPN6
714	IFNAR1_466/rA1	AVFFPS	24	1	experimental		TYK2,STAT3,STAT2,STAT1
715	PTPN11_279/rA1	AKNILP	24	2	experimental		GRB2
716	EPOR_489/rA1	AENSLI	24	3	experimental		LYN,SH3BP2
717	mKLRA7_8/rA1	ASTVRF	24	4	experimental		PTPN6
718	FRS2_196/rA1	AVNTTG	24	5	experimental		GRB2
719	mNFAM1_215/rA1	ATSLQR	24	6	experimental		SYK,ZAP70
720	CD300A_267/rA1	AASVVF	24	7	experimental		PTPN11,PTPN6
721	EGFR_1110/rA1	AHNQPL	24	8	experimental		GRB2
722	GRM4_667/rA1	AAALLT	24	9	experimental		PTPN6
723	LAX1_373/rA1	AENVLT	24	10	experimental		GRB2
724	SIG12_588/rA1	ASEINI	24	11	experimental		PTPN11,PTPN6
725	SCN11A_1643/rA1	ASALSD	24	12	experimental		PTPN11,PTPN6
726	SCN11A_1587/rA1	AIIISF	24	13	experimental		PTPN11,PTPN6
727	NTAL_95/rA1	AENVLI	24	14	experimental		GRB2
728	IL4R_497/rA1	ARSFSN	24	15	experimental		IRS1
729	PTPRC_1015/rA1	AINASF	24	16	experimental		GRB2
730	mLILRB4_322/rA1	AAQLCI	24	17	experimental		PTPN11,INPP5D,PTPN6
731	RASA1_615/rA1	ACNIYL	24	18	experimental		GRB2
732	CelLET23_1290/rA1	AYNEPH	24	19	experimental		GRB2
733	PTPN4_69/rA1	AFGLQL	24	20	experimental		PTPN6
734	TREML1_281/rA1	AATVIF	24	21	experimental		PTPN11
735	JUNB_182/rA1	ATNLSS	24	22	experimental		ABL1
736	HEXB_330/rA1	ASFLTT	24	23	experimental		PTPN11,PTPN6
737	IL6R_464/rA1	AFFPR	24	24	experimental		PTPN6
738	RB_321/rA1	AEEIYL	24	25	experimental		SRC,FYN,LCK,FGR
739	HEXB_277/rA1	AARLRG	24	26	experimental		PTPN11,PTPN6
740	DYST_959/rA1	AQNVLT	24	27	experimental		GRB2
741	CBL_869/rA1	ASYQDI	24	28	experimental		CRKL
742	SHC1_349/rA1	AYNDFP	24	29	experimental		GRB2,GRAP2,INPP5D
743	LAT_200/rA1	AVNVPE	24	30	experimental		GRAP2,GRAP,VAV1,PLCG1,GRB2,ZAP70,PIK3R1
744	SIGLEC9_433/rA1	AASLSF	24	31	experimental		PTPN6
745	PLCG1_292	yFFLDE	25	1	experimental		PTPN6
746	TNFL6_258	yVNVSE	25	2	experimental		GRB2
747	PTPN4_324	yFTLGS	25	3	experimental		PTPN6
748	IFNAR1_466	yVFFPS	25	4	experimental		TYK2,STAT3,STAT2,STAT1
749	LAT_200	yVNVPE	25	5	experimental		GRAP2,GRAP,VAV1,PLCG1,GRB2,ZAP70,PIK3R1
750	XPO7_669	yTALGR	25	6	experimental		PTPN11,PTPN6
751	MK10_223	yVVTRY	25	7	experimental		MK10_HUMAN
752	FLT3_969	yQNRRP	25	8	experimental		GRB2
753	GRM7_670	yAALLT	25	9	experimental		PTPN6
754	SOS1_974	yQNQPY	25	10	experimental		GRB2
755	GPR175_205	ySLVVI	25	11	experimental		PTPN11,PTPN6
756	gp60SU_498	ySHLSP	25	12	experimental		SYK
757	SCN5A_1755	yIIISF	25	13	experimental		PTPN11,PTPN6
758	SIG12_588	ySEINI	25	14	experimental		PTPN11,PTPN6
759	MCF2_899	yFYPTY	25	15	experimental		PTPN6
760	ITPR3_1588	yKNIIE	25	16	experimental		GRB2
761	CD22_822	ySELIQ	25	17	experimental		PTPN6
762	SSTR1_226	yTFLMG	25	18	experimental		PTPN11
763	FLT3_768	yENQKR	25	19	experimental		SH3BP2
764	OR51V1_141	ySSILT	25	20	experimental		PTPN6
765	FRYL_680	ySNVF	25	21	experimental		GRB7-SH2a
766	MET_1356	yVNVKC	25	22	experimental		INPP5D,INPPL1,PTPN11,PLCG1,GRB2,PIK3R1
767	MCTP2_859	yAELKL	25	23	experimental		PTPN6
768	TREML1_281	yATVIF	25	24	experimental		PTPN11
769	IRS4_1016	yIEVIF	25	25	experimental		PLCG1,PTPN11
770	IRS1_46	yYENEK	25	26	experimental		IRS1
771	SIG10_597	yINVVP	25	27	experimental		PTPN11,PTPN6
772	Tom1l1_441	yYEVME	25	28	experimental		PIK3R1
773	TRKC_705	ySTDYY	25	29	experimental		TRKC_HUMAN
774	KIT_703	yKNLLH	25	30	experimental		GRB2
775	CLM1_249	yASLTL	25	31	experimental		INPP5D,PTPN6
776	PLCG1_292/rA1	AFFLDE	26	1	experimental		PTPN6
777	TNFL6_258/rA1	AVNVSE	26	2	experimental		GRB2
778	PTPN4_324/rA1	AFTLGS	26	3	experimental		PTPN6
779	IFNAR1_466/rA1	AVFFPS	26	4	experimental		TYK2,STAT3,STAT2,STAT1
780	LAT_200/rA1	AVNVPE	26	5	experimental		GRAP2,GRAP,VAV1,PLCG1,GRB2,ZAP70,PIK3R1
781	XPO7_669/rA1	ATALGR	26	6	experimental		PTPN11,PTPN6
782	MK10_223/rA1	AVVTRY	26	7	experimental		MK10_HUMAN
783	FLT3_969/rA1	AQNRRP	26	8	experimental		GRB2
784	GRM7_670/rA1	AAALLT	26	9	experimental		PTPN6
785	SOS1_974/rA1	AQNQPY	26	10	experimental		GRB2
786	GPR175_205/rA1	ASLVVI	26	11	experimental		PTPN11,PTPN6
787	gp60SU_498/rA1	ASHLSP	26	12	experimental		SYK
788	SCN5A_1755/rA1	AIIISF	26	13	experimental		PTPN11,PTPN6
789	SIG12_588/rA1	ASEINI	26	14	experimental		PTPN11,PTPN6
790	MCF2_899/rA1	AFYPTY	26	15	experimental		PTPN6
791	ITPR3_1588/rA1	AKNIIE	26	16	experimental		GRB2
792	CD22_822/rA1	ASELIQ	26	17	experimental		PTPN6
793	SSTR1_226/rA1	ATFLMG	26	18	experimental		PTPN11
794	FLT3_768/rA1	AENQKR	26	19	experimental		SH3BP2
795	OR51V1_141/rA1	ASSILT	26	20	experimental		PTPN6
796	FRYL_680/rA1	ASNVF	26	21	experimental		GRB7-SH2a
797	MET_1356/rA1	AVNVKC	26	22	experimental		INPP5D,INPPL1,PTPN11,PLCG1,GRB2,PIK3R1
798	MCTP2_859/rA1	AAELKL	26	23	experimental		PTPN6
799	TREML1_281/rA1	AATVIF	26	24	experimental		PTPN11
800	IRS4_1016/rA1	AIEVIF	26	25	experimental		PLCG1,PTPN11
801	IRS1_46/rA1	AYENEK	26	26	experimental		IRS1
802	SIG10_597/rA1	AINVVP	26	27	experimental		PTPN11,PTPN6
803	Tom1l1_441/rA1	AYEVME	26	28	experimental		PIK3R1
804	TRKC_705/rA1	ASTDYY	26	29	experimental		TRKC_HUMAN
805	KIT_703/rA1	AKNLLH	26	30	experimental		GRB2
806	CLM1_249/rA1	AASLTL	26	31	experimental		INPP5D,PTPN6
807	mCEACAM1_488	yTVLNF	27	1	experimental		PTPN11,PTPN6,SHC1
808	PTPRA_295	yINASF	27	2	experimental		GRB2
809	mFCERB_210	yEELNV	27	3	experimental		SRC,SHC1,SYK,FYN,FGR,LCK
810	PLCG1_292	yFFLDE	27	4	experimental		PTPN6
811	KIT_703	yKNLLH	27	5	experimental		GRB2
812	CEACAM1_493	ySTLNF	27	6	experimental		PTPN11,PTPN6
813	INSR_1185	yETDYY	27	7	experimental		APS,PTPN11,SH2B1,GRB14,GRB10
814	EGFR_113	yENSYA	27	8	experimental		GRB2
815	KIT_936	ySNLAN	27	9	experimental		PLCG1,GRB2,GRB7
816	PTPN18_303	yQNIKE	27	10	experimental		TEC
817	FGFR2_561	yVIVEY	27	11	experimental		PLCG2,PLCG1,GRB2,PTPN11,SHC1
818	mCD22_837	ySELVQ	27	12	experimental		SYK,PLCG1,PTPN6
819	PTPN11_584	yENVGL	27	13	experimental		PTPN11,GRB2,FYN
820	GPR175_205	ySLVVI	27	14	experimental		PTPN11,PTPN6
821	FGFR3_552	yVLVEY	27	15	experimental		GRB2,SHC1
822	IRS4_921	yVNMDF	27	16	experimental		GRB2,PIK3R1
823	RANBP17_668	yTALTR	27	17	experimental		PTPN6
824	PDGFRA_572	yIYVDP	27	18	experimental		SRC,SHC1,PTPN11,FYN,SLA,STAT5B,PLCG1,PIK3R1,RASA1,YES1
825	ETV6_314	yMNHIM	27	19	experimental		GRB2
826	LRCH4_676	yTRLLG	27	20	experimental		PTPN6
827	FRYL_680	ySNVF	27	21	experimental		GRB7-SH2a
828	NTAL_233	yVNGEV	27	22	experimental		GRB2
829	NFAM1_220	yTALQR	27	23	experimental		SYK,ZAP70
830	FRYL_680	ySNVF	27	24	experimental		GRB7-SH2a
831	LEPR_986	yATLIS	27	25	experimental		PTPN11,CISH,SOCS3
832	IRS1_612	yMPMSPG	27	26	experimental		IRS1
833	LAT_220	yVNVSQ	27	27	experimental		VAV1,GRB2,PLCG1,GRAP2,PIK3R1
834	CD33_340	yASLNF	27	28	experimental		PTPN11,PTPN6
835	SSTR1_81	yVILRY	27	29	experimental		PTPN11
836	CSF1R_923	yANLPS	27	30	experimental		GRB2
837	OR8D1_223	ySILHI	27	31	experimental		PTPN6
838	mCEACAM1_488/rA1	ATVLNF	28	1	experimental		PTPN11,PTPN6,SHC1
839	PTPRA_295/rA1	AINASF	28	2	experimental		GRB2
840	mFCERB_210/rA1	AEELNV	28	3	experimental		SRC,SHC1,SYK,FYN,FGR,LCK
841	PLCG1_292/rA1	AFFLDE	28	4	experimental		PTPN6
842	KIT_703/rA1	AKNLLH	28	5	experimental		GRB2
843	CEACAM1_493/rA1	ASTLNF	28	6	experimental		PTPN11,PTPN6
844	INSR_1185/rA1	AETDYY	28	7	experimental		APS,PTPN11,SH2B1,GRB14,GRB10
845	EGFR_113/rA1	AENSYA	28	8	experimental		GRB2
846	KIT_936/rA1	ASNLAN	28	9	experimental		PLCG1,GRB2,GRB7
847	PTPN18_303/rA1	AQNIKE	28	10	experimental		TEC
848	FGFR2_561/rA1	AVIVEY	28	11	experimental		PLCG2,PLCG1,GRB2,PTPN11,SHC1
849	mCD22_837/rA1	ASELVQ	28	12	experimental		SYK,PLCG1,PTPN6
850	PTPN11_584/rA1	AENVGL	28	13	experimental		PTPN11,GRB2,FYN
851	GPR175_205/rA1	ASLVVI	28	14	experimental		PTPN11,PTPN6
852	FGFR3_552/rA1	AVLVEY	28	15	experimental		GRB2,SHC1
853	IRS4_921/rA1	AVNMDF	28	16	experimental		GRB2,PIK3R1
854	RANBP17_668/rA1	ATALTR	28	17	experimental		PTPN6
855	PDGFRA_572/rA1	AIYVDP	28	18	experimental		SRC,SHC1,PTPN11,FYN,SLA,STAT5B,PLCG1,PIK3R1,RASA1,YES1
856	ETV6_314/rA1	AMNHIM	28	19	experimental		GRB2
857	LRCH4_676/rA1	ATRLLG	28	20	experimental		PTPN6
858	FRYL_680/rA1	ASNVF	28	21	experimental		GRB7-SH2a
859	NTAL_233/rA1	AVNGEV	28	22	experimental		GRB2
860	NFAM1_220/rA1	ATALQR	28	23	experimental		SYK,ZAP70
861	FRYL_680/rA1	ASNVF	28	24	experimental		GRB7-SH2a
862	LEPR_986/rA1	AATLIS	28	25	experimental		PTPN11,CISH,SOCS3
863	IRS1_612/rA1	AMPMSPG	28	26	experimental		IRS1
864	LAT_220/rA1	AVNVSQ	28	27	experimental		VAV1,GRB2,PLCG1,GRAP2,PIK3R1
865	CD33_340/rA1	AASLNF	28	28	experimental		PTPN11,PTPN6
866	SSTR1_81/rA1	AVILRY	28	29	experimental		PTPN11
867	CSF1R_923/rA1	AANLPS	28	30	experimental		GRB2
868	OR8D1_223/rA1	ASILHI	28	31	experimental		PTPN6
869	SHC1_349	yYNDFP	29	1	experimental		GRB2,GRAP2,INPP5D
870	PTPRC_1015	yINASF	29	2	experimental		GRB2
871	FRS3_455	yAVIDL	29	3	experimental		PTPN11
872	mCEACAM1_488	yTVLNF	29	4	experimental		PTPN11,PTPN6,SHC1
873	CSF1R_923	yANLPS	29	5	experimental		GRB2
874	OR12D2_251	yAPVLF	29	6	experimental		PTPN6
875	JAK2_201	yNSVSY	29	7	experimental		PTPN11
876	PTPRA_798	yANFK	29	8	experimental		SRC,GRB2
877	CD3D_160	ySHLGG	29	9	experimental		SYK,SHC1,ZAP70
878	NTAL_136	yQNFSK	29	10	experimental		GRB2
879	FRS2_471	yAVIDI	29	11	experimental		PTPN11
880	HEXB_277	yARLRG	29	12	experimental		PTPN11,PTPN6
881	FAK1_925	yENVTG	29	13	experimental		SRC,STAT3,SHC1,GRB2,FES,SH3BP2
882	FGFR2_561	yVIVEY	29	14	experimental		PLCG2,PLCG1,GRB2,PTPN11,SHC1
883	MAPK3_145	yFLYQI	29	15	experimental		PTPN6
884	rIRS1_895	yVNIEF	29	16	experimental		PTPN11,GRB2,PIK3R1
885	GCET2_128	ySLLHM	29	17	experimental		PTPN6
886	SIGLEC6_426	yAVLHF	29	18	experimental		PTPN11,PTPN6
887	RASA1_619	yLNSVQ	29	19	experimental		GRB2
888	EPHA2_960	ySLLGL	29	20	experimental		PTPN11
889	IRS2_823	yVLMSS	29	21	experimental		PIK3R1
890	EGFR_1110	yHNQPL	29	22	experimental		GRB2
891	PAR1_337	ySFLSH	29	23	experimental		PTPN11,PTPN6
892	FRYL_680	ySNVF	29	24	experimental		GRB7-SH2a
893	IL8RA_46	yALVFL	29	25	experimental		PTPN6
894	IRS1_632	yMPMSPK	29	26	experimental		IRS1
895	FLT3_955	yQNVDG	29	27	experimental		GRB2
896	SIGLEC12_565	yASLSF	29	28	experimental		PTPN11,PTPN6
897	SSTR2_66	yVILRY	29	29	experimental		PTPN11
898	IL1RL1_99	yANVTI	29	30	experimental		GRB2,MATK
899	mLILRB4_322	yAQLCI	29	31	experimental		PTPN11,INPP5D,PTPN6
900	SHC1_349/rA1	AYNDFP	30	1	experimental		GRB2,GRAP2,INPP5D
901	PTPRC_1015/rA1	AINASF	30	2	experimental		GRB2
902	FRS3_455/rA1	AAVIDL	30	3	experimental		PTPN11
903	mCEACAM1_488/rA1	ATVLNF	30	4	experimental		PTPN11,PTPN6,SHC1
904	CSF1R_923/rA1	AANLPS	30	5	experimental		GRB2
905	OR12D2_251/rA1	AAPVLF	30	6	experimental		PTPN6
906	JAK2_201/rA1	ANSVSY	30	7	experimental		PTPN11
907	PTPRA_798/rA1	AANFK	30	8	experimental		SRC,GRB2
908	CD3D_160/rA1	ASHLGG	30	9	experimental		SYK,SHC1,ZAP70
909	NTAL_136/rA1	AQNFSK	30	10	experimental		GRB2
910	FRS2_471/rA1	AAVIDI	30	11	experimental		PTPN11
911	HEXB_277/rA1	AARLRG	30	12	experimental		PTPN11,PTPN6
912	FAK1_925/rA1	AENVTG	30	13	experimental		SRC,STAT3,SHC1,GRB2,FES,SH3BP2
913	FGFR2_561/rA1	AVIVEY	30	14	experimental		PLCG2,PLCG1,GRB2,PTPN11,SHC1
914	MAPK3_145/rA1	AFLYQI	30	15	experimental		PTPN6
915	rIRS1_895/rA1	AVNIEF	30	16	experimental		PTPN11,GRB2,PIK3R1
916	GCET2_128/rA1	ASLLHM	30	17	experimental		PTPN6
917	SIGLEC6_426/rA1	AAVLHF	30	18	experimental		PTPN11,PTPN6
918	RASA1_619/rA1	ALNSVQ	30	19	experimental		GRB2
919	EPHA2_960/rA1	ASLLGL	30	20	experimental		PTPN11
920	IRS2_823/rA1	AVLMSS	30	21	experimental		PIK3R1
921	EGFR_1110/rA1	AHNQPL	30	22	experimental		GRB2
922	PAR1_337/rA1	ASFLSH	30	23	experimental		PTPN11,PTPN6
923	FRYL_680/rA1	ASNVF	30	24	experimental		GRB7-SH2a
924	IL8RA_46/rA1	AALVFL	30	25	experimental		PTPN6
925	IRS1_632/rA1	AMPMSPK	30	26	experimental		IRS1
926	FLT3_955/rA1	AQNVDG	30	27	experimental		GRB2
927	SIGLEC12_565/rA1	AASLSF	30	28	experimental		PTPN11,PTPN6
928	SSTR2_66/rA1	AVILRY	30	29	experimental		PTPN11
929	IL1RL1_99/rA1	AANVTI	30	30	experimental		GRB2,MATK
930	mLILRB4_322/rA1	AAQLCI	30	31	experimental		PTPN11,INPP5D,PTPN6
931	TRKC_705	ySTDYY	31	1	experimental		TRKC_HUMAN
932	ITPR3_1588	yKNIIE	31	2	experimental		GRB2
933	CBL_869	ySYQDI	31	3	experimental		CRKL
934	SHC1_349	yYNDFP	31	4	experimental		GRB2,GRAP2,INPP5D
935	IL1RL1_99	yANVTI	31	5	experimental		GRB2,MATK
936	GRM2_647	ySALLT	31	6	experimental		PTPN6
937	CD22_762	yTTLRF	31	7	experimental		PTPN6
938	MYPT1_68	yANVDG	31	8	experimental		GRB2
939	TAAR8_216	ySKIFL	31	9	experimental		PTPN11,PTPN6
940	FLT1_1213	yVNAFK	31	10	experimental		PTPN11,GRB2,NCK1,PIK3R1
941	TUBA3_432	yEEVGV	31	11	experimental		FYN
942	IRS1_46	yYENEK	31	12	experimental		IRS1
943	LAX1_373	yENVLT	31	13	experimental		GRB2
944	FRS2_471	yAVIDI	31	14	experimental		PTPN11
945	CD84_279	yTYIMA	31	15	experimental		SH2D1B,PTPN11,SH2D1A,INPP5D,PTPN6
946	SHC1_427	yVNIQN	31	16	experimental		GRB2
947	RANBP17_737	yTMLFD	31	17	experimental		PTPN6
948	PIGM_47	yTDIDY	31	18	experimental		PTPN6
949	MYO3B_1275	yYNQLN	31	19	experimental		GRB2
950	mCD22_777	yAILRF	31	20	experimental		SYK,PLCG1,PTPN6
951	EPOR_454	yLYLVV	31	21	experimental		SYK,STAT5A,CISH,SOCS3,PTPN6
952	FLT3_969	yQNRRP	31	22	experimental		GRB2
953	PTPN4_69	yFGLQL	31	23	experimental		PTPN6
954	IRS2_823	yVLMSS	31	24	experimental		PIK3R1
955	IL8RB_55	yALVFL	31	25	experimental		PTPN6
956	IRS1_662	yMMMSP	31	26	experimental		IRS1
957	PILRA_246	yENIRN	31	27	experimental		PTPN11,PTPN6
958	SIGLEC5_520	yASLSF	31	28	experimental		PTPN11,PTPN6
959	GJA1_265	yAYFNG	31	29	experimental		SRC
960	IRS1_47	yENEKK	31	30	experimental		GRB2,SH3BP2
961	CD22_822	ySELIQ	31	31	experimental		PTPN6
962	TRKC_705/rA1	ASTDYY	32	1	experimental		TRKC_HUMAN
963	ITPR3_1588/rA1	AKNIIE	32	2	experimental		GRB2
964	CBL_869/rA1	ASYQDI	32	3	experimental		CRKL
965	SHC1_349/rA1	AYNDFP	32	4	experimental		GRB2,GRAP2,INPP5D
966	IL1RL1_99/rA1	AANVTI	32	5	experimental		GRB2,MATK
967	GRM2_647/rA1	ASALLT	32	6	experimental		PTPN6
968	CD22_762/rA1	ATTLRF	32	7	experimental		PTPN6
969	MYPT1_68/rA1	AANVDG	32	8	experimental		GRB2
970	TAAR8_216/rA1	ASKIFL	32	9	experimental		PTPN11,PTPN6
971	FLT1_1213/rA1	AVNAFK	32	10	experimental		PTPN11,GRB2,NCK1,PIK3R1
972	TUBA3_432/rA1	AEEVGV	32	11	experimental		FYN
973	IRS1_46/rA1	AYENEK	32	12	experimental		IRS1
974	LAX1_373/rA1	AENVLT	32	13	experimental		GRB2
975	FRS2_471/rA1	AAVIDI	32	14	experimental		PTPN11
976	CD84_279/rA1	ATYIMA	32	15	experimental		SH2D1B,PTPN11,SH2D1A,INPP5D,PTPN6
977	SHC1_427/rA1	AVNIQN	32	16	experimental		GRB2
978	RANBP17_737/rA1	ATMLFD	32	17	experimental		PTPN6
979	PIGM_47/rA1	ATDIDY	32	18	experimental		PTPN6
980	MYO3B_1275/rA1	AYNQLN	32	19	experimental		GRB2
981	mCD22_777/rA1	AAILRF	32	20	experimental		SYK,PLCG1,PTPN6
982	EPOR_454/rA1	ALYLVV	32	21	experimental		SYK,STAT5A,CISH,SOCS3,PTPN6
983	FLT3_969/rA1	AQNRRP	32	22	experimental		GRB2
984	PTPN4_69/rA1	AFGLQL	32	23	experimental		PTPN6
985	IRS2_823/rA1	AVLMSS	32	24	experimental		PIK3R1
986	IL8RB_55/rA1	AALVFL	32	25	experimental		PTPN6
987	IRS1_662/rA1	AMMMSP	32	26	experimental		IRS1
988	PILRA_246/rA1	AENIRN	32	27	experimental		PTPN11,PTPN6
989	SIGLEC5_520/rA1	AASLSF	32	28	experimental		PTPN11,PTPN6
990	GJA1_265/rA1	AAYFNG	32	29	experimental		SRC
991	IRS1_47/rA1	AENEKK	32	30	experimental		GRB2,SH3BP2
992	CD22_822/rA1	ASELIQ	32	31	experimental		PTPN6
993	SSTR1_81	yVILRY	33	1	experimental		PTPN11
994	IRS4_921	yVNMDF	33	2	experimental		GRB2,PIK3R1
995	Tom1l1_441	yYEVME	33	3	experimental		PIK3R1
996	TRKC_705	ySTDYY	33	4	experimental		TRKC_HUMAN
997	IRS1_47	yENEKK	33	5	experimental		GRB2,SH3BP2
998	GRM3_656	ySALLT	33	6	experimental		PTPN6
999	PDCD1_248	yATIVF	33	7	experimental		PTPN11,PTPN6
1000	SIT1_188	yANSQP	33	8	experimental		GRB2
1001	SCN11A_1643	ySALSD	33	9	experimental		PTPN11,PTPN6
1002	LAT_255	yENLQE	33	10	experimental		GRAP,VAV1,PLCG1,GRB2,ZAP70
1003	STAT5B_665	yLIYVF	33	11	experimental		PTPN11,PTPN6
1004	IRS1_612	yMPMSPG	33	12	experimental		IRS1
1005	SOS1_974	yQNQPY	33	13	experimental		GRB2
1006	TUBA3_432	yEEVGV	33	14	experimental		FYN
1007	CTLA4_177	ySFLLT	33	15	experimental		PTPN11,FYN
1008	TIE1_1117	yVNMSL	33	16	experimental		PIK3R1
1009	FCGR2B_292	ySLLMH	33	17	experimental		INPP5D,SHC1,PTPN11,PIK3R1,LYN,PTPN6
1010	PTPN18_281	yRFLYH	33	18	experimental		TEC
1011	JUNB_182	yTNLSS	33	19	experimental		ABL1
1012	LILRB4_412	yAQLHS	33	20	experimental		PTPN6
1013	IL2RB_364	yFFFHL	33	21	experimental		PTPN6
1014	EGFR_113	yENSYA	33	22	experimental		GRB2
1015	OR51V1_141	ySSILT	33	23	experimental		PTPN6
1016	EPOR_454	yLYLVV	33	24	experimental		SYK,STAT5A,CISH,SOCS3,PTPN6
1017	mSHPS1_313	yTSLFL	33	25	experimental		PTPN11
1018	IRS1_896	yVNIEF	33	26	experimental		IRS1
1019	PTPN11_279	yKNILP	33	27	experimental		GRB2
1020	SIGLEC9_433	yASLSF	33	28	experimental		PTPN6
1021	KLRA1_8	ySTLRF	33	29	experimental		PTPN11,PTPN6
1022	PTPN11_546	yTNIKY	33	30	experimental		PTPN11,GRB2,FYN,SOCS3
1023	RANBP17_668	yTALTR	33	31	experimental		PTPN6
1024	SSTR1_81/rA1	AVILRY	34	1	experimental		PTPN11
1025	IRS4_921/rA1	AVNMDF	34	2	experimental		GRB2,PIK3R1
1026	Tom1l1_441/rA1	AYEVME	34	3	experimental		PIK3R1
1027	TRKC_705/rA1	ASTDYY	34	4	experimental		TRKC_HUMAN
1028	IRS1_47/rA1	AENEKK	34	5	experimental		GRB2,SH3BP2
1029	GRM3_656/rA1	ASALLT	34	6	experimental		PTPN6
1030	PDCD1_248/rA1	AATIVF	34	7	experimental		PTPN11,PTPN6
1031	SIT1_188/rA1	AANSQP	34	8	experimental		GRB2
1032	SCN11A_1643/rA1	ASALSD	34	9	experimental		PTPN11,PTPN6
1033	LAT_255/rA1	AENLQE	34	10	experimental		GRAP,VAV1,PLCG1,GRB2,ZAP70
1034	STAT5B_665/rA1	ALIYVF	34	11	experimental		PTPN11,PTPN6
1035	IRS1_612/rA1	AMPMSPG	34	12	experimental		IRS1
1036	SOS1_974/rA1	AQNQPY	34	13	experimental		GRB2
1037	TUBA3_432/rA1	AEEVGV	34	14	experimental		FYN
1038	CTLA4_177/rA1	ASFLLT	34	15	experimental		PTPN11,FYN
1039	TIE1_1117/rA1	AVNMSL	34	16	experimental		PIK3R1
1040	FCGR2B_292/rA1	ASLLMH	34	17	experimental		INPP5D,SHC1,PTPN11,PIK3R1,LYN,PTPN6
1041	PTPN18_281/rA1	ARFLYH	34	18	experimental		TEC
1042	JUNB_182/rA1	ATNLSS	34	19	experimental		ABL1
1043	LILRB4_412/rA1	AAQLHS	34	20	experimental		PTPN6
1044	IL2RB_364/rA1	AFFFHL	34	21	experimental		PTPN6
1045	EGFR_113/rA1	AENSYA	34	22	experimental		GRB2
1046	OR51V1_141/rA1	ASSILT	34	23	experimental		PTPN6
1047	EPOR_454/rA1	ALYLVV	34	24	experimental		SYK,STAT5A,CISH,SOCS3,PTPN6
1048	mSHPS1_313/rA1	ATSLFL	34	25	experimental		PTPN11
1049	IRS1_896/rA1	AVNIEF	34	26	experimental		IRS1
1050	PTPN11_279/rA1	AKNILP	34	27	experimental		GRB2
1051	SIGLEC9_433/rA1	AASLSF	34	28	experimental		PTPN6
1052	KLRA1_8/rA1	ASTLRF	34	29	experimental		PTPN11,PTPN6
1053	PTPN11_546/rA1	ATNIKY	34	30	experimental		PTPN11,GRB2,FYN,SOCS3
1054	RANBP17_668/rA1	ATALTR	34	31	experimental		PTPN6
1055	SSTR2_66	yVILRY	35	1	experimental		PTPN11
1056	rIRS1_895	yVNIEF	35	2	experimental		PTPN11,GRB2,PIK3R1
1057	CD33_340	yASLNF	35	3	experimental		PTPN11,PTPN6
1058	SSTR1_81	yVILRY	35	4	experimental		PTPN11
1059	PTPN11_546	yTNIKY	35	5	experimental		PTPN11,GRB2,FYN,SOCS3
1060	SIT1_127	yTSLQL	35	6	experimental		PTPN11
1061	ERBB3_1197	yEYMNR	35	7	experimental		SHC1,SYK,GRB7,TENC1,PIK3R3,PIK3R2,PIK3R1,RASA1
1062	MET_681	yLNSGN	35	8	experimental		GRB2
1063	gp60SU_498	ySHLSP	35	9	experimental		SYK
1064	LAX1_294	yENVPA	35	10	experimental		GRB2
1065	CTNND1_656	yELLFQ	35	11	experimental		PTPN6
1066	IRS1_632	yMPMSPK	35	12	experimental		IRS1
1067	PTPN18_303	yQNIKE	35	13	experimental		TEC
1068	STAT5B_665	yLIYVF	35	14	experimental		PTPN11,PTPN6
1069	PTPRC_1216	yQFLYD	35	15	experimental		LCK
1070	PAK1_464	yLNENP	35	16	experimental		GRB2
1071	IL4R_713	ySALTC	35	17	experimental		PTPN11,INPP5D,PTPN6,SHC1
1072	BCAR1_664	yDYVHL	35	18	experimental		SRC,NCK1,FYN,FES,LCK
1073	MET_1356	yVNVKC	35	19	experimental		INPP5D,INPPL1,PTPN11,PLCG1,GRB2,PIK3R1
1074	SSTR2_312	yAFLSD	35	20	experimental		PTPN11,PTPN6
1075	CSF3R_787	yENLWF	35	21	experimental		SYK,SH3BP2
1076	PTPRA_798	yANFK	35	22	experimental		SRC,GRB2
1077	LRCH4_676	yTRLLG	35	23	experimental		PTPN6
1078	IL2RB_364	yFFFHL	35	24	experimental		PTPN6
1079	FCERB_219	yEELNI	35	25	experimental		SYK,LYN,FES,SHC1
1080	INSR_999	yLSASD	35	26	experimental		IRS1
1081	TNFL6_258	yVNVSE	35	27	experimental		GRB2
1082	CLM1_249	yASLTL	35	28	experimental		INPP5D,PTPN6
1083	IL2RB_381	yFTYDP	35	29	experimental		PTPN6
1084	EGFR_1138	yLNTVQ	35	30	experimental		GRB2,PLCG1,ABL2,PTPN11,RASA1
1085	GCET2_128	ySLLHM	35	31	experimental		PTPN6
1086	SSTR2_66/rA1	AVILRY	36	1	experimental		PTPN11
1087	rIRS1_895/rA1	AVNIEF	36	2	experimental		PTPN11,GRB2,PIK3R1
1088	CD33_340/rA1	AASLNF	36	3	experimental		PTPN11,PTPN6
1089	SSTR1_81/rA1	AVILRY	36	4	experimental		PTPN11
1090	PTPN11_546/rA1	ATNIKY	36	5	experimental		PTPN11,GRB2,FYN,SOCS3
1091	SIT1_127/rA1	ATSLQL	36	6	experimental		PTPN11
1092	ERBB3_1197/rA1	AEYMNR	36	7	experimental		SHC1,SYK,GRB7,TENC1,PIK3R3,PIK3R2,PIK3R1,RASA1
1093	MET_681/rA1	ALNSGN	36	8	experimental		GRB2
1094	gp60SU_498/rA1	ASHLSP	36	9	experimental		SYK
1095	LAX1_294/rA1	AENVPA	36	10	experimental		GRB2
1096	CTNND1_656/rA1	AELLFQ	36	11	experimental		PTPN6
1097	IRS1_632/rA1	AMPMSPK	36	12	experimental		IRS1
1098	PTPN18_303/rA1	AQNIKE	36	13	experimental		TEC
1099	STAT5B_665/rA1	ALIYVF	36	14	experimental		PTPN11,PTPN6
1100	PTPRC_1216/rA1	AQFLYD	36	15	experimental		LCK
1101	PAK1_464/rA1	ALNENP	36	16	experimental		GRB2
1102	IL4R_713/rA1	ASALTC	36	17	experimental		PTPN11,INPP5D,PTPN6,SHC1
1103	BCAR1_664/rA1	ADYVHL	36	18	experimental		SRC,NCK1,FYN,FES,LCK
1104	MET_1356/rA1	AVNVKC	36	19	experimental		INPP5D,INPPL1,PTPN11,PLCG1,GRB2,PIK3R1
1105	SSTR2_312/rA1	AAFLSD	36	20	experimental		PTPN11,PTPN6
1106	CSF3R_787/rA1	AENLWF	36	21	experimental		SYK,SH3BP2
1107	PTPRA_798/rA1	AANFK	36	22	experimental		SRC,GRB2
1108	LRCH4_676/rA1	ATRLLG	36	23	experimental		PTPN6
1109	IL2RB_364/rA1	AFFFHL	36	24	experimental		PTPN6
1110	FCERB_219/rA1	AEELNI	36	25	experimental		SYK,LYN,FES,SHC1
1111	INSR_999/rA1	ALSASD	36	26	experimental		IRS1
1112	TNFL6_258/rA1	AVNVSE	36	27	experimental		GRB2
1113	CLM1_249/rA1	AASLTL	36	28	experimental		INPP5D,PTPN6
1114	IL2RB_381/rA1	AFTYDP	36	29	experimental		PTPN6
1115	EGFR_1138/rA1	ALNTVQ	36	30	experimental		GRB2,PLCG1,ABL2,PTPN11,RASA1
1116	GCET2_128/rA1	ASLLHM	36	31	experimental		PTPN6
1117	GJA1_265	yAYFNG	37	1	experimental		SRC
1118	SHC1_427	yVNIQN	37	2	experimental		GRB2
1119	SIGLEC12_565	yASLSF	37	3	experimental		PTPN11,PTPN6
1120	SSTR2_66	yVILRY	37	4	experimental		PTPN11
1121	EGFR_1138	yLNTVQ	37	5	experimental		GRB2,PLCG1,ABL2,PTPN11,RASA1
1122	KLRC1_40	yAELNL	37	6	experimental		PTPN11,PTPN6
1123	WASF3_151	yTDPSY	37	7	experimental		PIK3R1
1124	PDGFRB_716	ySNALP	37	8	experimental		GRB2,GRB7
1125	mCD22_837	ySELVQ	37	9	experimental		SYK,PLCG1,PTPN6
1126	SPTAN1_2430	yQNLTR	37	10	experimental		GRB2
1127	EPOR_489	yENSLI	37	11	experimental		LYN,SH3BP2
1128	IRS1_662	yMMMSP	37	12	experimental		IRS1
1129	NTAL_136	yQNFSK	37	13	experimental		GRB2
1130	CTNND1_656	yELLFQ	37	14	experimental		PTPN6
1131	DAB1_198	yQYIVF	37	15	experimental		SRC,FYN
1132	GSTP1_199	yVNLPI	37	16	experimental		GRB2
1133	SIG10_667	yATLNF	37	17	experimental		PTPN11,PTPN6
1134	CASL_629	yDYVHL	37	18	experimental		SRC,FYN
1135	NTAL_233	yVNGEV	37	19	experimental		GRB2
1136	CXCR7_315	ySFINR	37	20	experimental		PTPN11,PTPN6
1137	SCN11A_1587	yIIISF	37	21	experimental		PTPN11,PTPN6
1138	MYPT1_68	yANVDG	37	22	experimental		GRB2
1139	EPHA2_960	ySLLGL	37	23	experimental		PTPN11
1140	CSF3R_787	yENLWF	37	24	experimental		SYK,SH3BP2
1141	TIE2_897	yLYLAI	37	25	experimental		PTPN11,PIK3R1
1142	RET_1062	yGMSDP	37	26	experimental		IRS1
1143	PTPRA_295	yINASF	37	27	experimental		GRB2
1144	OR8D1_223	ySILHI	37	28	experimental		PTPN6
1145	DYRA_219	yYIVHL	37	29	experimental		DYRA_HUMAN
1146	SHIP1_556	yMNILR	37	30	experimental		GRB2,INPP5D
1147	RANBP17_737	yTMLFD	37	31	experimental		PTPN6
1148	GJA1_265/rA1	AAYFNG	38	1	experimental		SRC
1149	SHC1_427/rA1	AVNIQN	38	2	experimental		GRB2
1150	SIGLEC12_565/rA1	AASLSF	38	3	experimental		PTPN11,PTPN6
1151	SSTR2_66/rA1	AVILRY	38	4	experimental		PTPN11
1152	EGFR_1138/rA1	ALNTVQ	38	5	experimental		GRB2,PLCG1,ABL2,PTPN11,RASA1
1153	KLRC1_40/rA1	AAELNL	38	6	experimental		PTPN11,PTPN6
1154	WASF3_151/rA1	ATDPSY	38	7	experimental		PIK3R1
1155	PDGFRB_716/rA1	ASNALP	38	8	experimental		GRB2,GRB7
1156	mCD22_837/rA1	ASELVQ	38	9	experimental		SYK,PLCG1,PTPN6
1157	SPTAN1_2430/rA1	AQNLTR	38	10	experimental		GRB2
1158	EPOR_489/rA1	AENSLI	38	11	experimental		LYN,SH3BP2
1159	IRS1_662/rA1	AMMMSP	38	12	experimental		IRS1
1160	NTAL_136/rA1	AQNFSK	38	13	experimental		GRB2
1161	CTNND1_656/rA1	AELLFQ	38	14	experimental		PTPN6
1162	DAB1_198/rA1	AQYIVF	38	15	experimental		SRC,FYN
1163	GSTP1_199/rA1	AVNLPI	38	16	experimental		GRB2
1164	SIG10_667/rA1	AATLNF	38	17	experimental		PTPN11,PTPN6
1165	CASL_629/rA1	ADYVHL	38	18	experimental		SRC,FYN
1166	NTAL_233/rA1	AVNGEV	38	19	experimental		GRB2
1167	CXCR7_315/rA1	ASFINR	38	20	experimental		PTPN11,PTPN6
1168	SCN11A_1587/rA1	AIIISF	38	21	experimental		PTPN11,PTPN6
1169	MYPT1_68/rA1	AANVDG	38	22	experimental		GRB2
1170	EPHA2_960/rA1	ASLLGL	38	23	experimental		PTPN11
1171	CSF3R_787/rA1	AENLWF	38	24	experimental		SYK,SH3BP2
1172	TIE2_897/rA1	ALYLAI	38	25	experimental		PTPN11,PIK3R1
1173	RET_1062/rA1	AGMSDP	38	26	experimental		IRS1
1174	PTPRA_295/rA1	AINASF	38	27	experimental		GRB2
1175	OR8D1_223/rA1	ASILHI	38	28	experimental		PTPN6
1176	DYRA_219/rA1	AYIVHL	38	29	experimental		DYRA_HUMAN
1177	SHIP1_556/rA1	AMNILR	38	30	experimental		GRB2,INPP5D
1178	RANBP17_737/rA1	ATMLFD	38	31	experimental		PTPN6
1179	KLRA1_8	ySTLRF	39	1	experimental		PTPN11,PTPN6
1180	TIE1_1117	yVNMSL	39	2	experimental		PIK3R1
1181	SIGLEC5_520	yASLSF	39	3	experimental		PTPN11,PTPN6
1182	GJA1_265	yAYFNG	39	4	experimental		SRC
1183	SHIP1_556	yMNILR	39	5	experimental		GRB2,INPP5D
1184	HEXB_330	ySFLTT	39	6	experimental		PTPN11,PTPN6
1185	IL6R_464	yFFPR	39	7	experimental		PTPN6
1186	RB_321	yEEIYL	39	8	experimental		SRC,FYN,LCK,FGR
1187	HEXB_277	yARLRG	39	9	experimental		PTPN11,PTPN6
1188	DYST_959	yQNVLT	39	10	experimental		GRB2
1189	PTPN4_324	yFTLGS	39	11	experimental		PTPN6
1190	IRS1_896	yVNIEF	39	12	experimental		IRS1
1191	FLT1_1213	yVNAFK	39	13	experimental		PTPN11,GRB2,NCK1,PIK3R1
1192	EPOR_489	yENSLI	39	14	experimental		LYN,SH3BP2
1193	mKLRA7_8	ySTVRF	39	15	experimental		PTPN6
1194	FRS2_196	yVNTTG	39	16	experimental		GRB2
1195	mNFAM1_215	yTSLQR	39	17	experimental		SYK,ZAP70
1196	CD300A_267	yASVVF	39	18	experimental		PTPN11,PTPN6
1197	EGFR_1110	yHNQPL	39	19	experimental		GRB2
1198	GRM4_667	yAALLT	39	20	experimental		PTPN6
1199	SCN5A_1755	yIIISF	39	21	experimental		PTPN11,PTPN6
1200	SIT1_188	yANSQP	39	22	experimental		GRB2
1201	mCD22_777	yAILRF	39	23	experimental		SYK,PLCG1,PTPN6
1202	SCN11A_1587	yIIISF	39	24	experimental		PTPN11,PTPN6
1203	NTAL_95	yENVLI	39	25	experimental		GRB2
1204	IL4R_497	yRSFSN	39	26	experimental		IRS1
1205	PTPRC_1015	yINASF	39	27	experimental		GRB2
1206	mLILRB4_322	yAQLCI	39	28	experimental		PTPN11,INPP5D,PTPN6
1207	RASA1_615	yCNIYL	39	29	experimental		GRB2
1208	IRS1_941	yMKMDL	39	30	experimental		GRB2,PIK3R1
1209	FCGR2B_292	ySLLMH	39	31	experimental		INPP5D,SHC1,PTPN11,PIK3R1,LYN,PTPN6
1210	KLRA1_8/rA1	ASTLRF	40	1	experimental		PTPN11,PTPN6
1211	TIE1_1117/rA1	AVNMSL	40	2	experimental		PIK3R1
1212	SIGLEC5_520/rA1	AASLSF	40	3	experimental		PTPN11,PTPN6
1213	GJA1_265/rA1	AAYFNG	40	4	experimental		SRC
1214	SHIP1_556/rA1	AMNILR	40	5	experimental		GRB2,INPP5D
1215	HEXB_330/rA1	ASFLTT	40	6	experimental		PTPN11,PTPN6
1216	IL6R_464/rA1	AFFPR	40	7	experimental		PTPN6
1217	RB_321/rA1	AEEIYL	40	8	experimental		SRC,FYN,LCK,FGR
1218	HEXB_277/rA1	AARLRG	40	9	experimental		PTPN11,PTPN6
1219	DYST_959/rA1	AQNVLT	40	10	experimental		GRB2
1220	PTPN4_324/rA1	AFTLGS	40	11	experimental		PTPN6
1221	IRS1_896/rA1	AVNIEF	40	12	experimental		IRS1
1222	FLT1_1213/rA1	AVNAFK	40	13	experimental		PTPN11,GRB2,NCK1,PIK3R1
1223	EPOR_489/rA1	AENSLI	40	14	experimental		LYN,SH3BP2
1224	mKLRA7_8/rA1	ASTVRF	40	15	experimental		PTPN6
1225	FRS2_196/rA1	AVNTTG	40	16	experimental		GRB2
1226	mNFAM1_215/rA1	ATSLQR	40	17	experimental		SYK,ZAP70
1227	CD300A_267/rA1	AASVVF	40	18	experimental		PTPN11,PTPN6
1228	EGFR_1110/rA1	AHNQPL	40	19	experimental		GRB2
1229	GRM4_667/rA1	AAALLT	40	20	experimental		PTPN6
1230	SCN5A_1755/rA1	AIIISF	40	21	experimental		PTPN11,PTPN6
1231	SIT1_188/rA1	AANSQP	40	22	experimental		GRB2
1232	mCD22_777/rA1	AAILRF	40	23	experimental		SYK,PLCG1,PTPN6
1233	SCN11A_1587/rA1	AIIISF	40	24	experimental		PTPN11,PTPN6
1234	NTAL_95/rA1	AENVLI	40	25	experimental		GRB2
1235	IL4R_497/rA1	ARSFSN	40	26	experimental		IRS1
1236	PTPRC_1015/rA1	AINASF	40	27	experimental		GRB2
1237	mLILRB4_322/rA1	AAQLCI	40	28	experimental		PTPN11,INPP5D,PTPN6
1238	RASA1_615/rA1	ACNIYL	40	29	experimental		GRB2
1239	IRS1_941/rA1	AMKMDL	40	30	experimental		GRB2,PIK3R1
1240	FCGR2B_292/rA1	ASLLMH	40	31	experimental		INPP5D,SHC1,PTPN11,PIK3R1,LYN,PTPN6
1241	IL2RB_381	yFTYDP	41	1	experimental		PTPN6
1242	PAK1_464	yLNENP	41	2	experimental		GRB2
1243	SIGLEC9_433	yASLSF	41	3	experimental		PTPN6
1244	KLRA1_8	ySTLRF	41	4	experimental		PTPN11,PTPN6
1245	IRS1_941	yMKMDL	41	5	experimental		GRB2,PIK3R1
1246	MCTP2_859	yAELKL	41	6	experimental		PTPN6
1247	TREML1_281	yATVIF	41	7	experimental		PTPN11
1248	IRS4_1016	yIEVIF	41	8	experimental		PLCG1,PTPN11
1249	IRS1_46	yYENEK	41	9	experimental		IRS1
1250	SIG10_597	yINVVP	41	10	experimental		PTPN11,PTPN6
1251	mFCERB_210	yEELNV	41	11	experimental		SRC,SHC1,SYK,FYN,FGR,LCK
1252	INSR_999	yLSASD	41	12	experimental		IRS1
1253	LAT_255	yENLQE	41	13	experimental		GRAP,VAV1,PLCG1,GRB2,ZAP70
1254	PTPN4_324	yFTLGS	41	14	experimental		PTPN6
1255	IFNAR1_466	yVFFPS	41	15	experimental		TYK2,STAT3,STAT2,STAT1
1256	LAT_200	yVNVPE	41	16	experimental		GRAP2,GRAP,VAV1,PLCG1,GRB2,ZAP70,PIK3R1
1257	XPO7_669	yTALGR	41	17	experimental		PTPN11,PTPN6
1258	MK10_223	yVVTRY	41	18	experimental		MK10_HUMAN
1259	FLT3_969	yQNRRP	41	19	experimental		GRB2
1260	GRM7_670	yAALLT	41	20	experimental		PTPN6
1261	PTPN11_584	yENVGL	41	21	experimental		PTPN11,GRB2,FYN
1262	MET_681	yLNSGN	41	22	experimental		GRB2
1263	LILRB4_412	yAQLHS	41	23	experimental		PTPN6
1264	SCN5A_1755	yIIISF	41	24	experimental		PTPN11,PTPN6
1265	SIG12_588	ySEINI	41	25	experimental		PTPN11,PTPN6
1266	MCF2_899	yFYPTY	41	26	experimental		PTPN6
1267	ITPR3_1588	yKNIIE	41	27	experimental		GRB2
1268	CD22_822	ySELIQ	41	28	experimental		PTPN6
1269	SSTR1_226	yTFLMG	41	29	experimental		PTPN11
1270	LAX1_268	yVNMTG	41	30	experimental		GRB2,PIK3R1
1271	IL4R_713	ySALTC	41	31	experimental		PTPN11,INPP5D,PTPN6,SHC1
1272	IL2RB_381/rA1	AFTYDP	42	1	experimental		PTPN6
1273	PAK1_464/rA1	ALNENP	42	2	experimental		GRB2
1274	SIGLEC9_433/rA1	AASLSF	42	3	experimental		PTPN6
1275	KLRA1_8/rA1	ASTLRF	42	4	experimental		PTPN11,PTPN6
1276	IRS1_941/rA1	AMKMDL	42	5	experimental		GRB2,PIK3R1
1277	MCTP2_859/rA1	AAELKL	42	6	experimental		PTPN6
1278	TREML1_281/rA1	AATVIF	42	7	experimental		PTPN11
1279	IRS4_1016/rA1	AIEVIF	42	8	experimental		PLCG1,PTPN11
1280	IRS1_46/rA1	AYENEK	42	9	experimental		IRS1
1281	SIG10_597/rA1	AINVVP	42	10	experimental		PTPN11,PTPN6
1282	mFCERB_210/rA1	AEELNV	42	11	experimental		SRC,SHC1,SYK,FYN,FGR,LCK
1283	INSR_999/rA1	ALSASD	42	12	experimental		IRS1
1284	LAT_255/rA1	AENLQE	42	13	experimental		GRAP,VAV1,PLCG1,GRB2,ZAP70
1285	PTPN4_324/rA1	AFTLGS	42	14	experimental		PTPN6
1286	IFNAR1_466/rA1	AVFFPS	42	15	experimental		TYK2,STAT3,STAT2,STAT1
1287	LAT_200/rA1	AVNVPE	42	16	experimental		GRAP2,GRAP,VAV1,PLCG1,GRB2,ZAP70,PIK3R1
1288	XPO7_669/rA1	ATALGR	42	17	experimental		PTPN11,PTPN6
1289	MK10_223/rA1	AVVTRY	42	18	experimental		MK10_HUMAN
1290	FLT3_969/rA1	AQNRRP	42	19	experimental		GRB2
1291	GRM7_670/rA1	AAALLT	42	20	experimental		PTPN6
1292	PTPN11_584/rA1	AENVGL	42	21	experimental		PTPN11,GRB2,FYN
1293	MET_681/rA1	ALNSGN	42	22	experimental		GRB2
1294	LILRB4_412/rA1	AAQLHS	42	23	experimental		PTPN6
1295	SCN5A_1755/rA1	AIIISF	42	24	experimental		PTPN11,PTPN6
1296	SIG12_588/rA1	ASEINI	42	25	experimental		PTPN11,PTPN6
1297	MCF2_899/rA1	AFYPTY	42	26	experimental		PTPN6
1298	ITPR3_1588/rA1	AKNIIE	42	27	experimental		GRB2
1299	CD22_822/rA1	ASELIQ	42	28	experimental		PTPN6
1300	SSTR1_226/rA1	ATFLMG	42	29	experimental		PTPN11
1301	LAX1_268/rA1	AVNMTG	42	30	experimental		GRB2,PIK3R1
1302	IL4R_713/rA1	ASALTC	42	31	experimental		PTPN11,INPP5D,PTPN6,SHC1
1303	A	A	43	1	LC Control		Custom Sequence
1304	Grb2_+	yKNLHL	43	2	LC Control		Custom Sequence
1305	CLM1_249	yASLTL	43	3	experimental		INPP5D,PTPN6
1306	IL2RB_381	yFTYDP	43	4	experimental		PTPN6
1307	LAX1_268	yVNMTG	43	5	experimental		GRB2,PIK3R1
1308	NFAM1_220	yTALQR	43	6	experimental		SYK,ZAP70
1309	FRYL_680	ySNVF	43	7	experimental		GRB7-SH2a
1310	LEPR_986	yATLIS	43	8	experimental		PTPN11,CISH,SOCS3
1311	IRS1_612	yMPMSPG	43	9	experimental		IRS1
1312	LAT_220	yVNVSQ	43	10	experimental		VAV1,GRB2,PLCG1,GRAP2,PIK3R1
1313	A	A	43	11	LC Control		Custom Sequence
1314	Grb2_+	yKNLHL	43	12	LC Control		Custom Sequence
1315	LAX1_294	yENVPA	43	13	experimental		GRB2
1316	mFCERB_210	yEELNV	43	14	experimental		SRC,SHC1,SYK,FYN,FGR,LCK
1317	PLCG1_292	yFFLDE	43	15	experimental		PTPN6
1318	KIT_703	yKNLLH	43	16	experimental		GRB2
1319	CEACAM1_493	ySTLNF	43	17	experimental		PTPN11,PTPN6
1320	INSR_1185	yETDYY	43	18	experimental		APS,PTPN11,SH2B1,GRB14,GRB10
1321	EGFR_113	yENSYA	43	19	experimental		GRB2
1322	KIT_936	ySNLAN	43	20	experimental		PLCG1,GRB2,GRB7
1323	A	A	43	21	LC Control		Custom Sequence
1324	Grb2_+	yKNLHL	43	22	LC Control		Custom Sequence
1325	SSTR2_312	yAFLSD	43	23	experimental		PTPN11,PTPN6
1326	PTPN11_584	yENVGL	43	24	experimental		PTPN11,GRB2,FYN
1327	GPR175_205	ySLVVI	43	25	experimental		PTPN11,PTPN6
1328	FGFR3_552	yVLVEY	43	26	experimental		GRB2,SHC1
1329	IRS4_921	yVNMDF	43	27	experimental		GRB2,PIK3R1
1330	RANBP17_668	yTALTR	43	28	experimental		PTPN6
1331	PDGFRA_572	yIYVDP	43	29	experimental		SRC,SHC1,PTPN11,FYN,SLA,STAT5B,PLCG1,PIK3R1,RASA1,YES1
1332	A	A	43	30	LC Control		Custom Sequence
1333	Grb2_+	yKNLHL	43	31	LC Control		Custom Sequence
1334	Y	Y	44	1	LC Control		Custom Sequence
1335	Grb2_neg	YKNLHL	44	2	LC Control		Custom Sequence
1336	CLM1_249/rA1	AASLTL	44	3	experimental		INPP5D,PTPN6
1337	IL2RB_381/rA1	AFTYDP	44	4	experimental		PTPN6
1338	LAX1_268/rA1	AVNMTG	44	5	experimental		GRB2,PIK3R1
1339	NFAM1_220/rA1	ATALQR	44	6	experimental		SYK,ZAP70
1340	FRYL_680/rA1	ASNVF	44	7	experimental		GRB7-SH2a
1341	LEPR_986/rA1	AATLIS	44	8	experimental		PTPN11,CISH,SOCS3
1342	IRS1_612/rA1	AMPMSPG	44	9	experimental		IRS1
1343	LAT_220/rA1	AVNVSQ	44	10	experimental		VAV1,GRB2,PLCG1,GRAP2,PIK3R1
1344	Y	Y	44	11	LC Control		Custom Sequence
1345	Grb2_neg	YKNLHL	44	12	LC Control		Custom Sequence
1346	LAX1_294/rA1	AENVPA	44	13	experimental		GRB2
1347	mFCERB_210/rA1	AEELNV	44	14	experimental		SRC,SHC1,SYK,FYN,FGR,LCK
1348	PLCG1_292/rA1	AFFLDE	44	15	experimental		PTPN6
1349	KIT_703/rA1	AKNLLH	44	16	experimental		GRB2
1350	CEACAM1_493/rA1	ASTLNF	44	17	experimental		PTPN11,PTPN6
1351	INSR_1185/rA1	AETDYY	44	18	experimental		APS,PTPN11,SH2B1,GRB14,GRB10
1352	EGFR_113/rA1	AENSYA	44	19	experimental		GRB2
1353	KIT_936/rA1	ASNLAN	44	20	experimental		PLCG1,GRB2,GRB7
1354	Y	Y	44	21	LC Control		Custom Sequence
1355	Grb2_neg	YKNLHL	44	22	LC Control		Custom Sequence
1356	SSTR2_312/rA1	AAFLSD	44	23	experimental		PTPN11,PTPN6
1357	PTPN11_584/rA1	AENVGL	44	24	experimental		PTPN11,GRB2,FYN
1358	GPR175_205/rA1	ASLVVI	44	25	experimental		PTPN11,PTPN6
1359	FGFR3_552/rA1	AVLVEY	44	26	experimental		GRB2,SHC1
1360	IRS4_921/rA1	AVNMDF	44	27	experimental		GRB2,PIK3R1
1361	RANBP17_668/rA1	ATALTR	44	28	experimental		PTPN6
1362	PDGFRA_572/rA1	AIYVDP	44	29	experimental		SRC,SHC1,PTPN11,FYN,SLA,STAT5B,PLCG1,PIK3R1,RASA1,YES1
1363	Y	Y	44	30	LC Control		Custom Sequence
1364	Grb2_neg	YKNLHL	44	31	LC Control		Custom Sequence
1365	pY	y	45	1	LC Control		Custom Sequence
1366	Src_+	yEEIYL	45	2	LC Control		Custom Sequence
1367	OR8D1_223	ySILHI	45	3	experimental		PTPN6
1368	DYRA_219	yYIVHL	45	4	experimental		DYRA_HUMAN
1369	LC7L2_173	yRNSMP	45	5	experimental		GRB2
1370	PAR1_337	ySFLSH	45	6	experimental		PTPN11,PTPN6
1371	FRYL_680	ySNVF	45	7	experimental		GRB7-SH2a
1372	IL8RA_46	yALVFL	45	8	experimental		PTPN6
1373	IRS1_632	yMPMSPK	45	9	experimental		IRS1
1374	FLT3_955	yQNVDG	45	10	experimental		GRB2
1375	pY	y	45	11	LC Control		Custom Sequence
1376	Src_+	yEEIYL	45	12	LC Control		Custom Sequence
1377	SPTAN1_2430	yQNLTR	45	13	experimental		GRB2
1378	FRS3_455	yAVIDL	45	14	experimental		PTPN11
1379	mCEACAM1_488	yTVLNF	45	15	experimental		PTPN11,PTPN6,SHC1
1380	CSF1R_923	yANLPS	45	16	experimental		GRB2
1381	OR12D2_251	yAPVLF	45	17	experimental		PTPN6
1382	JAK2_201	yNSVSY	45	18	experimental		PTPN11
1383	PTPRA_798	yANFK	45	19	experimental		SRC,GRB2
1384	CD3D_160	ySHLGG	45	20	experimental		SYK,SHC1,ZAP70
1385	pY	y	45	21	LC Control		Custom Sequence
1386	Src_+	yEEIYL	45	22	LC Control		Custom Sequence
1387	CXCR7_315	ySFINR	45	23	experimental		PTPN11,PTPN6
1388	FAK1_925	yENVTG	45	24	experimental		SRC,STAT3,SHC1,GRB2,FES,SH3BP2
1389	FGFR2_561	yVIVEY	45	25	experimental		PLCG2,PLCG1,GRB2,PTPN11,SHC1
1390	MAPK3_145	yFLYQI	45	26	experimental		PTPN6
1391	rIRS1_895	yVNIEF	45	27	experimental		PTPN11,GRB2,PIK3R1
1392	GCET2_128	ySLLHM	45	28	experimental		PTPN6
1393	SIGLEC6_426	yAVLHF	45	29	experimental		PTPN11,PTPN6
1394	pY	y	45	30	LC Control		Custom Sequence
1395	Src_+	yEEIYL	45	31	LC Control		Custom Sequence
1396	HA_+	YPYDVPDYA	46	1	LC Control		Custom Sequence
1397	Src_neg	YEEIYL	46	2	LC Control		Custom Sequence
1398	OR8D1_223/rA1	ASILHI	46	3	experimental		PTPN6
1399	DYRA_219/rA1	AYIVHL	46	4	experimental		DYRA_HUMAN
1400	LC7L2_173/rA1	ARNSMP	46	5	experimental		GRB2
1401	PAR1_337/rA1	ASFLSH	46	6	experimental		PTPN11,PTPN6
1402	FRYL_680/rA1	ASNVF	46	7	experimental		GRB7-SH2a
1403	IL8RA_46/rA1	AALVFL	46	8	experimental		PTPN6
1404	IRS1_632/rA1	AMPMSPK	46	9	experimental		IRS1
1405	FLT3_955/rA1	AQNVDG	46	10	experimental		GRB2
1406	HA_+	YPYDVPDYA	46	11	LC Control		Custom Sequence
1407	Src_neg	YEEIYL	46	12	LC Control		Custom Sequence
1408	SPTAN1_2430/rA1	AQNLTR	46	13	experimental		GRB2
1409	FRS3_455/rA1	AAVIDL	46	14	experimental		PTPN11
1410	mCEACAM1_488/rA1	ATVLNF	46	15	experimental		PTPN11,PTPN6,SHC1
1411	CSF1R_923/rA1	AANLPS	46	16	experimental		GRB2
1412	OR12D2_251/rA1	AAPVLF	46	17	experimental		PTPN6
1413	JAK2_201/rA1	ANSVSY	46	18	experimental		PTPN11
1414	PTPRA_798/rA1	AANFK	46	19	experimental		SRC,GRB2
1415	CD3D_160/rA1	ASHLGG	46	20	experimental		SYK,SHC1,ZAP70
1416	HA_+	YPYDVPDYA	46	21	LC Control		Custom Sequence
1417	Src_neg	YEEIYL	46	22	LC Control		Custom Sequence
1418	CXCR7_315/rA1	ASFINR	46	23	experimental		PTPN11,PTPN6
1419	FAK1_925/rA1	AENVTG	46	24	experimental		SRC,STAT3,SHC1,GRB2,FES,SH3BP2
1420	FGFR2_561/rA1	AVIVEY	46	25	experimental		PLCG2,PLCG1,GRB2,PTPN11,SHC1
1421	MAPK3_145/rA1	AFLYQI	46	26	experimental		PTPN6
1422	rIRS1_895/rA1	AVNIEF	46	27	experimental		PTPN11,GRB2,PIK3R1
1423	GCET2_128/rA1	ASLLHM	46	28	experimental		PTPN6
1424	SIGLEC6_426/rA1	AAVLHF	46	29	experimental		PTPN11,PTPN6
1425	HA_+	YPYDVPDYA	46	30	LC Control		Custom Sequence
1426	Src_neg	YEEIYL	46	31	LC Control		Custom Sequence
1427	AFM2+	DYKDDDDK	47	1	LC Control		Custom Sequence
1428	RASA1_+	yMAPYD	47	2	LC Control		Custom Sequence
1429	mLILRB4_322	yAQLCI	47	3	experimental		PTPN11,INPP5D,PTPN6
1430	RASA1_615	yCNIYL	47	4	experimental		GRB2
1431	CelLET23_1290	yYNEPH	47	5	experimental		GRB2
1432	PTPN4_69	yFGLQL	47	6	experimental		PTPN6
1433	IRS2_823	yVLMSS	47	7	experimental		PIK3R1
1434	IL8RB_55	yALVFL	47	8	experimental		PTPN6
1435	IRS1_662	yMMMSP	47	9	experimental		IRS1
1436	PILRA_246	yENIRN	47	10	experimental		PTPN11,PTPN6
1437	AFM2+	DYKDDDDK	47	11	LC Control		Custom Sequence
1438	RASA1_+	yMAPYD	47	12	LC Control		Custom Sequence
1439	DYST_959	yQNVLT	47	13	experimental		GRB2
1440	CBL_869	ySYQDI	47	14	experimental		CRKL
1441	SHC1_349	yYNDFP	47	15	experimental		GRB2,GRAP2,INPP5D
1442	IL1RL1_99	yANVTI	47	16	experimental		GRB2,MATK
1443	GRM2_647	ySALLT	47	17	experimental		PTPN6
1444	CD22_762	yTTLRF	47	18	experimental		PTPN6
1445	MYPT1_68	yANVDG	47	19	experimental		GRB2
1446	TAAR8_216	ySKIFL	47	20	experimental		PTPN11,PTPN6
1447	AFM2+	DYKDDDDK	47	21	LC Control		Custom Sequence
1448	RASA1_+	yMAPYD	47	22	LC Control		Custom Sequence
1449	GRM4_667	yAALLT	47	23	experimental		PTPN6
1450	LAX1_373	yENVLT	47	24	experimental		GRB2
1451	FRS2_471	yAVIDI	47	25	experimental		PTPN11
1452	CD84_279	yTYIMA	47	26	experimental		SH2D1B,PTPN11,SH2D1A,INPP5D,PTPN6
1453	SHC1_427	yVNIQN	47	27	experimental		GRB2
1454	RANBP17_737	yTMLFD	47	28	experimental		PTPN6
1455	PIGM_47	yTDIDY	47	29	experimental		PTPN6
1456	AFM2+	DYKDDDDK	47	30	LC Control		Custom Sequence
1457	RASA1_+	yMAPYD	47	31	LC Control		Custom Sequence
1458	CRP	WTPPFKTR	48	1	LC Control		Custom Sequence
1459	RASA1_Neg	YMAPYD	48	2	LC Control		Custom Sequence
1460	mLILRB4_322/rA1	AAQLCI	48	3	experimental		PTPN11,INPP5D,PTPN6
1461	RASA1_615/rA1	ACNIYL	48	4	experimental		GRB2
1462	CelLET23_1290/rA1	AYNEPH	48	5	experimental		GRB2
1463	PTPN4_69/rA1	AFGLQL	48	6	experimental		PTPN6
1464	IRS2_823/rA1	AVLMSS	48	7	experimental		PIK3R1
1465	IL8RB_55/rA1	AALVFL	48	8	experimental		PTPN6
1466	IRS1_662/rA1	AMMMSP	48	9	experimental		IRS1
1467	PILRA_246/rA1	AENIRN	48	10	experimental		PTPN11,PTPN6
1468	CRP	WTPPFKTR	48	11	LC Control		Custom Sequence
1469	RASA1_Neg	YMAPYD	48	12	LC Control		Custom Sequence
1470	DYST_959/rA1	AQNVLT	48	13	experimental		GRB2
1471	CBL_869/rA1	ASYQDI	48	14	experimental		CRKL
1472	SHC1_349/rA1	AYNDFP	48	15	experimental		GRB2,GRAP2,INPP5D
1473	IL1RL1_99/rA1	AANVTI	48	16	experimental		GRB2,MATK
1474	GRM2_647/rA1	ASALLT	48	17	experimental		PTPN6
1475	CD22_762/rA1	ATTLRF	48	18	experimental		PTPN6
1476	MYPT1_68/rA1	AANVDG	48	19	experimental		GRB2
1477	TAAR8_216/rA1	ASKIFL	48	20	experimental		PTPN11,PTPN6
1478	CRP	WTPPFKTR	48	21	LC Control		Custom Sequence
1479	RASA1_Neg	YMAPYD	48	22	LC Control		Custom Sequence
1480	GRM4_667/rA1	AAALLT	48	23	experimental		PTPN6
1481	LAX1_373/rA1	AENVLT	48	24	experimental		GRB2
1482	FRS2_471/rA1	AAVIDI	48	25	experimental		PTPN11
1483	CD84_279/rA1	ATYIMA	48	26	experimental		SH2D1B,PTPN11,SH2D1A,INPP5D,PTPN6
1484	SHC1_427/rA1	AVNIQN	48	27	experimental		GRB2
1485	RANBP17_737/rA1	ATMLFD	48	28	experimental		PTPN6
1486	PIGM_47/rA1	ATDIDY	48	29	experimental		PTPN6
1487	CRP	WTPPFKTR	48	30	LC Control		Custom Sequence
1488	RASA1_Neg	YMAPYD	48	31	LC Control		Custom Sequence
1489	DYRA_219	yYIVHL	49	1	experimental		DYRA_HUMAN
1490	GSTP1_199	yVNLPI	49	2	experimental		GRB2
1491	CD22_822	ySELIQ	49	3	experimental		PTPN6
1492	SSTR1_226	yTFLMG	49	4	experimental		PTPN11
1493	FLT3_768	yENQKR	49	5	experimental		SH3BP2
1494	OR51V1_141	ySSILT	49	6	experimental		PTPN6
1495	EPOR_454	yLYLVV	49	7	experimental		SYK,STAT5A,CISH,SOCS3,PTPN6
1496	mSHPS1_313	yTSLFL	49	8	experimental		PTPN11
1497	IRS1_896	yVNIEF	49	9	experimental		IRS1
1498	PTPN11_279	yKNILP	49	10	experimental		GRB2
1499	FRS3_455	yAVIDL	49	11	experimental		PTPN11
1500	RET_1062	yGMSDP	49	12	experimental		IRS1
1501	SIG10_597	yINVVP	49	13	experimental		PTPN11,PTPN6
1502	Tom1l1_441	yYEVME	49	14	experimental		PIK3R1
1503	TRKC_705	ySTDYY	49	15	experimental		TRKC_HUMAN
1504	IRS1_47	yENEKK	49	16	experimental		GRB2,SH3BP2
1505	GRM3_656	ySALLT	49	17	experimental		PTPN6
1506	PDCD1_248	yATIVF	49	18	experimental		PTPN11,PTPN6
1507	SIT1_188	yANSQP	49	19	experimental		GRB2
1508	SCN11A_1643	ySALSD	49	20	experimental		PTPN11,PTPN6
1509	FAK1_925	yENVTG	49	21	experimental		SRC,STAT3,SHC1,GRB2,FES,SH3BP2
1510	PDGFRB_716	ySNALP	49	22	experimental		GRB2,GRB7
1511	GRM7_670	yAALLT	49	23	experimental		PTPN6
1512	SOS1_974	yQNQPY	49	24	experimental		GRB2
1513	TUBA3_432	yEEVGV	49	25	experimental		FYN
1514	CTLA4_177	ySFLLT	49	26	experimental		PTPN11,FYN
1515	TIE1_1117	yVNMSL	49	27	experimental		PIK3R1
1516	FCGR2B_292	ySLLMH	49	28	experimental		INPP5D,SHC1,PTPN11,PIK3R1,LYN,PTPN6
1517	PTPN18_281	yRFLYH	49	29	experimental		TEC
1518	LC7L2_173	yRNSMP	49	30	experimental		GRB2
1519	SIG10_667	yATLNF	49	31	experimental		PTPN11,PTPN6
1520	DYRA_219/rA1	AYIVHL	50	1	experimental		DYRA_HUMAN
1521	GSTP1_199/rA1	AVNLPI	50	2	experimental		GRB2
1522	CD22_822/rA1	ASELIQ	50	3	experimental		PTPN6
1523	SSTR1_226/rA1	ATFLMG	50	4	experimental		PTPN11
1524	FLT3_768/rA1	AENQKR	50	5	experimental		SH3BP2
1525	OR51V1_141/rA1	ASSILT	50	6	experimental		PTPN6
1526	EPOR_454/rA1	ALYLVV	50	7	experimental		SYK,STAT5A,CISH,SOCS3,PTPN6
1527	mSHPS1_313/rA1	ATSLFL	50	8	experimental		PTPN11
1528	IRS1_896/rA1	AVNIEF	50	9	experimental		IRS1
1529	PTPN11_279/rA1	AKNILP	50	10	experimental		GRB2
1530	FRS3_455/rA1	AAVIDL	50	11	experimental		PTPN11
1531	RET_1062/rA1	AGMSDP	50	12	experimental		IRS1
1532	SIG10_597/rA1	AINVVP	50	13	experimental		PTPN11,PTPN6
1533	Tom1l1_441/rA1	AYEVME	50	14	experimental		PIK3R1
1534	TRKC_705/rA1	ASTDYY	50	15	experimental		TRKC_HUMAN
1535	IRS1_47/rA1	AENEKK	50	16	experimental		GRB2,SH3BP2
1536	GRM3_656/rA1	ASALLT	50	17	experimental		PTPN6
1537	PDCD1_248/rA1	AATIVF	50	18	experimental		PTPN11,PTPN6
1538	SIT1_188/rA1	AANSQP	50	19	experimental		GRB2
1539	SCN11A_1643/rA1	ASALSD	50	20	experimental		PTPN11,PTPN6
1540	FAK1_925/rA1	AENVTG	50	21	experimental		SRC,STAT3,SHC1,GRB2,FES,SH3BP2
1541	PDGFRB_716/rA1	ASNALP	50	22	experimental		GRB2,GRB7
1542	GRM7_670/rA1	AAALLT	50	23	experimental		PTPN6
1543	SOS1_974/rA1	AQNQPY	50	24	experimental		GRB2
1544	TUBA3_432/rA1	AEEVGV	50	25	experimental		FYN
1545	CTLA4_177/rA1	ASFLLT	50	26	experimental		PTPN11,FYN
1546	TIE1_1117/rA1	AVNMSL	50	27	experimental		PIK3R1
1547	FCGR2B_292/rA1	ASLLMH	50	28	experimental		INPP5D,SHC1,PTPN11,PIK3R1,LYN,PTPN6
1548	PTPN18_281/rA1	ARFLYH	50	29	experimental		TEC
1549	LC7L2_173/rA1	ARNSMP	50	30	experimental		GRB2
1550	SIG10_667/rA1	AATLNF	50	31	experimental		PTPN11,PTPN6
1551	RASA1_615	yCNIYL	51	1	experimental		GRB2
1552	FRS2_196	yVNTTG	51	2	experimental		GRB2
1553	RANBP17_668	yTALTR	51	3	experimental		PTPN6
1554	PDGFRA_572	yIYVDP	51	4	experimental		SRC,SHC1,PTPN11,FYN,SLA,STAT5B,PLCG1,PIK3R1,RASA1,YES1
1555	ETV6_314	yMNHIM	51	5	experimental		GRB2
1556	LRCH4_676	yTRLLG	51	6	experimental		PTPN6
1557	IL2RB_364	yFFFHL	51	7	experimental		PTPN6
1558	FCERB_219	yEELNI	51	8	experimental		SYK,LYN,FES,SHC1
1559	INSR_999	yLSASD	51	9	experimental		IRS1
1560	TNFL6_258	yVNVSE	51	10	experimental		GRB2
1561	CBL_869	ySYQDI	51	11	experimental		CRKL
1562	IL4R_497	yRSFSN	51	12	experimental		IRS1
1563	LAT_220	yVNVSQ	51	13	experimental		VAV1,GRB2,PLCG1,GRAP2,PIK3R1
1564	CD33_340	yASLNF	51	14	experimental		PTPN11,PTPN6
1565	SSTR1_81	yVILRY	51	15	experimental		PTPN11
1566	PTPN11_546	yTNIKY	51	16	experimental		PTPN11,GRB2,FYN,SOCS3
1567	SIT1_127	yTSLQL	51	17	experimental		PTPN11
1568	ERBB3_1197	yEYMNR	51	18	experimental		SHC1,SYK,GRB7,TENC1,PIK3R3,PIK3R2,PIK3R1,RASA1
1569	MET_681	yLNSGN	51	19	experimental		GRB2
1570	gp60SU_498	ySHLSP	51	20	experimental		SYK
1571	LAX1_373	yENVLT	51	21	experimental		GRB2
1572	RB_321	yEEIYL	51	22	experimental		SRC,FYN,LCK,FGR
1573	KIT_936	ySNLAN	51	23	experimental		PLCG1,GRB2,GRB7
1574	PTPN18_303	yQNIKE	51	24	experimental		TEC
1575	STAT5B_665	yLIYVF	51	25	experimental		PTPN11,PTPN6
1576	PTPRC_1216	yQFLYD	51	26	experimental		LCK
1577	PAK1_464	yLNENP	51	27	experimental		GRB2
1578	IL4R_713	ySALTC	51	28	experimental		PTPN11,INPP5D,PTPN6,SHC1
1579	BCAR1_664	yDYVHL	51	29	experimental		SRC,NCK1,FYN,FES,LCK
1580	CelLET23_1290	yYNEPH	51	30	experimental		GRB2
1581	mNFAM1_215	yTSLQR	51	31	experimental		SYK,ZAP70
1582	RASA1_615/rA1	ACNIYL	52	1	experimental		GRB2
1583	FRS2_196/rA1	AVNTTG	52	2	experimental		GRB2
1584	RANBP17_668/rA1	ATALTR	52	3	experimental		PTPN6
1585	PDGFRA_572/rA1	AIYVDP	52	4	experimental		SRC,SHC1,PTPN11,FYN,SLA,STAT5B,PLCG1,PIK3R1,RASA1,YES1
1586	ETV6_314/rA1	AMNHIM	52	5	experimental		GRB2
1587	LRCH4_676/rA1	ATRLLG	52	6	experimental		PTPN6
1588	IL2RB_364/rA1	AFFFHL	52	7	experimental		PTPN6
1589	FCERB_219/rA1	AEELNI	52	8	experimental		SYK,LYN,FES,SHC1
1590	INSR_999/rA1	ALSASD	52	9	experimental		IRS1
1591	TNFL6_258/rA1	AVNVSE	52	10	experimental		GRB2
1592	CBL_869/rA1	ASYQDI	52	11	experimental		CRKL
1593	IL4R_497/rA1	ARSFSN	52	12	experimental		IRS1
1594	LAT_220/rA1	AVNVSQ	52	13	experimental		VAV1,GRB2,PLCG1,GRAP2,PIK3R1
1595	CD33_340/rA1	AASLNF	52	14	experimental		PTPN11,PTPN6
1596	SSTR1_81/rA1	AVILRY	52	15	experimental		PTPN11
1597	PTPN11_546/rA1	ATNIKY	52	16	experimental		PTPN11,GRB2,FYN,SOCS3
1598	SIT1_127/rA1	ATSLQL	52	17	experimental		PTPN11
1599	ERBB3_1197/rA1	AEYMNR	52	18	experimental		SHC1,SYK,GRB7,TENC1,PIK3R3,PIK3R2,PIK3R1,RASA1
1600	MET_681/rA1	ALNSGN	52	19	experimental		GRB2
1601	gp60SU_498/rA1	ASHLSP	52	20	experimental		SYK
1602	LAX1_373/rA1	AENVLT	52	21	experimental		GRB2
1603	RB_321/rA1	AEEIYL	52	22	experimental		SRC,FYN,LCK,FGR
1604	KIT_936/rA1	ASNLAN	52	23	experimental		PLCG1,GRB2,GRB7
1605	PTPN18_303/rA1	AQNIKE	52	24	experimental		TEC
1606	STAT5B_665/rA1	ALIYVF	52	25	experimental		PTPN11,PTPN6
1607	PTPRC_1216/rA1	AQFLYD	52	26	experimental		LCK
1608	PAK1_464/rA1	ALNENP	52	27	experimental		GRB2
1609	IL4R_713/rA1	ASALTC	52	28	experimental		PTPN11,INPP5D,PTPN6,SHC1
1610	BCAR1_664/rA1	ADYVHL	52	29	experimental		SRC,NCK1,FYN,FES,LCK
1611	CelLET23_1290/rA1	AYNEPH	52	30	experimental		GRB2
1612	mNFAM1_215/rA1	ATSLQR	52	31	experimental		SYK,ZAP70
1613	SSTR1_226	yTFLMG	53	1	experimental		PTPN11
1614	LAT_200	yVNVPE	53	2	experimental		GRAP2,GRAP,VAV1,PLCG1,GRB2,ZAP70,PIK3R1
1615	GCET2_128	ySLLHM	53	3	experimental		PTPN6
1616	SIGLEC6_426	yAVLHF	53	4	experimental		PTPN11,PTPN6
1617	RASA1_619	yLNSVQ	53	5	experimental		GRB2
1618	EPHA2_960	ySLLGL	53	6	experimental		PTPN11
1619	CSF3R_787	yENLWF	53	7	experimental		SYK,SH3BP2
1620	TIE2_897	yLYLAI	53	8	experimental		PTPN11,PIK3R1
1621	RET_1062	yGMSDP	53	9	experimental		IRS1
1622	PTPRA_295	yINASF	53	10	experimental		GRB2
1623	Tom1l1_441	yYEVME	53	11	experimental		PIK3R1
1624	MCF2_899	yFYPTY	53	12	experimental		PTPN6
1625	FLT3_955	yQNVDG	53	13	experimental		GRB2
1626	SIGLEC12_565	yASLSF	53	14	experimental		PTPN11,PTPN6
1627	SSTR2_66	yVILRY	53	15	experimental		PTPN11
1628	EGFR_1138	yLNTVQ	53	16	experimental		GRB2,PLCG1,ABL2,PTPN11,RASA1
1629	KLRC1_40	yAELNL	53	17	experimental		PTPN11,PTPN6
1630	WASF3_151	yTDPSY	53	18	experimental		PIK3R1
1631	PDGFRB_716	ySNALP	53	19	experimental		GRB2,GRB7
1632	mCD22_837	ySELVQ	53	20	experimental		SYK,PLCG1,PTPN6
1633	SOS1_974	yQNQPY	53	21	experimental		GRB2
1634	IRS4_1016	yIEVIF	53	22	experimental		PLCG1,PTPN11
1635	CD3D_160	ySHLGG	53	23	experimental		SYK,SHC1,ZAP70
1636	NTAL_136	yQNFSK	53	24	experimental		GRB2
1637	CTNND1_656	yELLFQ	53	25	experimental		PTPN6
1638	DAB1_198	yQYIVF	53	26	experimental		SRC,FYN
1639	GSTP1_199	yVNLPI	53	27	experimental		GRB2
1640	SIG10_667	yATLNF	53	28	experimental		PTPN11,PTPN6
1641	CASL_629	yDYVHL	53	29	experimental		SRC,FYN
1642	FLT3_768	yENQKR	53	30	experimental		SH3BP2
1643	XPO7_669	yTALGR	53	31	experimental		PTPN11,PTPN6
1644	SSTR1_226/rA1	ATFLMG	54	1	experimental		PTPN11
1645	LAT_200/rA1	AVNVPE	54	2	experimental		GRAP2,GRAP,VAV1,PLCG1,GRB2,ZAP70,PIK3R1
1646	GCET2_128/rA1	ASLLHM	54	3	experimental		PTPN6
1647	SIGLEC6_426/rA1	AAVLHF	54	4	experimental		PTPN11,PTPN6
1648	RASA1_619/rA1	ALNSVQ	54	5	experimental		GRB2
1649	EPHA2_960/rA1	ASLLGL	54	6	experimental		PTPN11
1650	CSF3R_787/rA1	AENLWF	54	7	experimental		SYK,SH3BP2
1651	TIE2_897/rA1	ALYLAI	54	8	experimental		PTPN11,PIK3R1
1652	RET_1062/rA1	AGMSDP	54	9	experimental		IRS1
1653	PTPRA_295/rA1	AINASF	54	10	experimental		GRB2
1654	Tom1l1_441/rA1	AYEVME	54	11	experimental		PIK3R1
1655	MCF2_899/rA1	AFYPTY	54	12	experimental		PTPN6
1656	FLT3_955/rA1	AQNVDG	54	13	experimental		GRB2
1657	SIGLEC12_565/rA1	AASLSF	54	14	experimental		PTPN11,PTPN6
1658	SSTR2_66/rA1	AVILRY	54	15	experimental		PTPN11
1659	EGFR_1138/rA1	ALNTVQ	54	16	experimental		GRB2,PLCG1,ABL2,PTPN11,RASA1
1660	KLRC1_40/rA1	AAELNL	54	17	experimental		PTPN11,PTPN6
1661	WASF3_151/rA1	ATDPSY	54	18	experimental		PIK3R1
1662	PDGFRB_716/rA1	ASNALP	54	19	experimental		GRB2,GRB7
1663	mCD22_837/rA1	ASELVQ	54	20	experimental		SYK,PLCG1,PTPN6
1664	SOS1_974/rA1	AQNQPY	54	21	experimental		GRB2
1665	IRS4_1016/rA1	AIEVIF	54	22	experimental		PLCG1,PTPN11
1666	CD3D_160/rA1	ASHLGG	54	23	experimental		SYK,SHC1,ZAP70
1667	NTAL_136/rA1	AQNFSK	54	24	experimental		GRB2
1668	CTNND1_656/rA1	AELLFQ	54	25	experimental		PTPN6
1669	DAB1_198/rA1	AQYIVF	54	26	experimental		SRC,FYN
1670	GSTP1_199/rA1	AVNLPI	54	27	experimental		GRB2
1671	SIG10_667/rA1	AATLNF	54	28	experimental		PTPN11,PTPN6
1672	CASL_629/rA1	ADYVHL	54	29	experimental		SRC,FYN
1673	FLT3_768/rA1	AENQKR	54	30	experimental		SH3BP2
1674	XPO7_669/rA1	ATALGR	54	31	experimental		PTPN11,PTPN6
1675	PDGFRA_572	yIYVDP	55	1	experimental		SRC,SHC1,PTPN11,FYN,SLA,STAT5B,PLCG1,PIK3R1,RASA1,YES1
1676	KIT_703	yKNLLH	55	2	experimental		GRB2
1677	RANBP17_737	yTMLFD	55	3	experimental		PTPN6
1678	PIGM_47	yTDIDY	55	4	experimental		PTPN6
1679	MYO3B_1275	yYNQLN	55	5	experimental		GRB2
1680	mCD22_777	yAILRF	55	6	experimental		SYK,PLCG1,PTPN6
1681	SCN11A_1587	yIIISF	55	7	experimental		PTPN11,PTPN6
1682	NTAL_95	yENVLI	55	8	experimental		GRB2
1683	IL4R_497	yRSFSN	55	9	experimental		IRS1
1684	PTPRC_1015	yINASF	55	10	experimental		GRB2
1685	CD33_340	yASLNF	55	11	experimental		PTPN11,PTPN6
1686	FGFR3_552	yVLVEY	55	12	experimental		GRB2,SHC1
1687	PILRA_246	yENIRN	55	13	experimental		PTPN11,PTPN6
1688	SIGLEC5_520	yASLSF	55	14	experimental		PTPN11,PTPN6
1689	GJA1_265	yAYFNG	55	15	experimental		SRC
1690	SHIP1_556	yMNILR	55	16	experimental		GRB2,INPP5D
1691	HEXB_330	ySFLTT	55	17	experimental		PTPN11,PTPN6
1692	IL6R_464	yFFPR	55	18	experimental		PTPN6
1693	RB_321	yEEIYL	55	19	experimental		SRC,FYN,LCK,FGR
1694	HEXB_277	yARLRG	55	20	experimental		PTPN11,PTPN6
1695	PTPN18_303	yQNIKE	55	21	experimental		TEC
1696	LEPR_986	yATLIS	55	22	experimental		PTPN11,CISH,SOCS3
1697	TAAR8_216	ySKIFL	55	23	experimental		PTPN11,PTPN6
1698	FLT1_1213	yVNAFK	55	24	experimental		PTPN11,GRB2,NCK1,PIK3R1
1699	EPOR_489	yENSLI	55	25	experimental		LYN,SH3BP2
1700	mKLRA7_8	ySTVRF	55	26	experimental		PTPN6
1701	FRS2_196	yVNTTG	55	27	experimental		GRB2
1702	mNFAM1_215	yTSLQR	55	28	experimental		SYK,ZAP70
1703	CD300A_267	yASVVF	55	29	experimental		PTPN11,PTPN6
1704	ETV6_314	yMNHIM	55	30	experimental		GRB2
1705	CEACAM1_493	ySTLNF	55	31	experimental		PTPN11,PTPN6
1706	PDGFRA_572/rA1	AIYVDP	56	1	experimental		SRC,SHC1,PTPN11,FYN,SLA,STAT5B,PLCG1,PIK3R1,RASA1,YES1
1707	KIT_703/rA1	AKNLLH	56	2	experimental		GRB2
1708	RANBP17_737/rA1	ATMLFD	56	3	experimental		PTPN6
1709	PIGM_47/rA1	ATDIDY	56	4	experimental		PTPN6
1710	MYO3B_1275/rA1	AYNQLN	56	5	experimental		GRB2
1711	mCD22_777/rA1	AAILRF	56	6	experimental		SYK,PLCG1,PTPN6
1712	SCN11A_1587/rA1	AIIISF	56	7	experimental		PTPN11,PTPN6
1713	NTAL_95/rA1	AENVLI	56	8	experimental		GRB2
1714	IL4R_497/rA1	ARSFSN	56	9	experimental		IRS1
1715	PTPRC_1015/rA1	AINASF	56	10	experimental		GRB2
1716	CD33_340/rA1	AASLNF	56	11	experimental		PTPN11,PTPN6
1717	FGFR3_552/rA1	AVLVEY	56	12	experimental		GRB2,SHC1
1718	PILRA_246/rA1	AENIRN	56	13	experimental		PTPN11,PTPN6
1719	SIGLEC5_520/rA1	AASLSF	56	14	experimental		PTPN11,PTPN6
1720	GJA1_265/rA1	AAYFNG	56	15	experimental		SRC
1721	SHIP1_556/rA1	AMNILR	56	16	experimental		GRB2,INPP5D
1722	HEXB_330/rA1	ASFLTT	56	17	experimental		PTPN11,PTPN6
1723	IL6R_464/rA1	AFFPR	56	18	experimental		PTPN6
1724	RB_321/rA1	AEEIYL	56	19	experimental		SRC,FYN,LCK,FGR
1725	HEXB_277/rA1	AARLRG	56	20	experimental		PTPN11,PTPN6
1726	PTPN18_303/rA1	AQNIKE	56	21	experimental		TEC
1727	LEPR_986/rA1	AATLIS	56	22	experimental		PTPN11,CISH,SOCS3
1728	TAAR8_216/rA1	ASKIFL	56	23	experimental		PTPN11,PTPN6
1729	FLT1_1213/rA1	AVNAFK	56	24	experimental		PTPN11,GRB2,NCK1,PIK3R1
1730	EPOR_489/rA1	AENSLI	56	25	experimental		LYN,SH3BP2
1731	mKLRA7_8/rA1	ASTVRF	56	26	experimental		PTPN6
1732	FRS2_196/rA1	AVNTTG	56	27	experimental		GRB2
1733	mNFAM1_215/rA1	ATSLQR	56	28	experimental		SYK,ZAP70
1734	CD300A_267/rA1	AASVVF	56	29	experimental		PTPN11,PTPN6
1735	ETV6_314/rA1	AMNHIM	56	30	experimental		GRB2
1736	CEACAM1_493/rA1	ASTLNF	56	31	experimental		PTPN11,PTPN6
1737	SIGLEC6_426	yAVLHF	57	1	experimental		PTPN11,PTPN6
1738	CSF1R_923	yANLPS	57	2	experimental		GRB2
1739	FCGR2B_292	ySLLMH	57	3	experimental		INPP5D,SHC1,PTPN11,PIK3R1,LYN,PTPN6
1740	PTPN18_281	yRFLYH	57	4	experimental		TEC
1741	JUNB_182	yTNLSS	57	5	experimental		ABL1
1742	LILRB4_412	yAQLHS	57	6	experimental		PTPN6
1743	SCN5A_1755	yIIISF	57	7	experimental		PTPN11,PTPN6
1744	SIG12_588	ySEINI	57	8	experimental		PTPN11,PTPN6
1745	MCF2_899	yFYPTY	57	9	experimental		PTPN6
1746	ITPR3_1588	yKNIIE	57	10	experimental		GRB2
1747	SIGLEC12_565	yASLSF	57	11	experimental		PTPN11,PTPN6
1748	MAPK3_145	yFLYQI	57	12	experimental		PTPN6
1749	PTPN11_279	yKNILP	57	13	experimental		GRB2
1750	SIGLEC9_433	yASLSF	57	14	experimental		PTPN6
1751	KLRA1_8	ySTLRF	57	15	experimental		PTPN11,PTPN6
1752	IRS1_941	yMKMDL	57	16	experimental		GRB2,PIK3R1
1753	MCTP2_859	yAELKL	57	17	experimental		PTPN6
1754	TREML1_281	yATVIF	57	18	experimental		PTPN11
1755	IRS4_1016	yIEVIF	57	19	experimental		PLCG1,PTPN11
1756	IRS1_46	yYENEK	57	20	experimental		IRS1
1757	NTAL_136	yQNFSK	57	21	experimental		GRB2
1758	IL8RA_46	yALVFL	57	22	experimental		PTPN6
1759	SCN11A_1643	ySALSD	57	23	experimental		PTPN11,PTPN6
1760	LAT_255	yENLQE	57	24	experimental		GRAP,VAV1,PLCG1,GRB2,ZAP70
1761	PTPN4_324	yFTLGS	57	25	experimental		PTPN6
1762	IFNAR1_466	yVFFPS	57	26	experimental		TYK2,STAT3,STAT2,STAT1
1763	LAT_200	yVNVPE	57	27	experimental		GRAP2,GRAP,VAV1,PLCG1,GRB2,ZAP70,PIK3R1
1764	XPO7_669	yTALGR	57	28	experimental		PTPN11,PTPN6
1765	MK10_223	yVVTRY	57	29	experimental		MK10_HUMAN
1766	RASA1_619	yLNSVQ	57	30	experimental		GRB2
1767	OR12D2_251	yAPVLF	57	31	experimental		PTPN6
1768	SIGLEC6_426/rA1	AAVLHF	58	1	experimental		PTPN11,PTPN6
1769	CSF1R_923/rA1	AANLPS	58	2	experimental		GRB2
1770	FCGR2B_292/rA1	ASLLMH	58	3	experimental		INPP5D,SHC1,PTPN11,PIK3R1,LYN,PTPN6
1771	PTPN18_281/rA1	ARFLYH	58	4	experimental		TEC
1772	JUNB_182/rA1	ATNLSS	58	5	experimental		ABL1
1773	LILRB4_412/rA1	AAQLHS	58	6	experimental		PTPN6
1774	SCN5A_1755/rA1	AIIISF	58	7	experimental		PTPN11,PTPN6
1775	SIG12_588/rA1	ASEINI	58	8	experimental		PTPN11,PTPN6
1776	MCF2_899/rA1	AFYPTY	58	9	experimental		PTPN6
1777	ITPR3_1588/rA1	AKNIIE	58	10	experimental		GRB2
1778	SIGLEC12_565/rA1	AASLSF	58	11	experimental		PTPN11,PTPN6
1779	MAPK3_145/rA1	AFLYQI	58	12	experimental		PTPN6
1780	PTPN11_279/rA1	AKNILP	58	13	experimental		GRB2
1781	SIGLEC9_433/rA1	AASLSF	58	14	experimental		PTPN6
1782	KLRA1_8/rA1	ASTLRF	58	15	experimental		PTPN11,PTPN6
1783	IRS1_941/rA1	AMKMDL	58	16	experimental		GRB2,PIK3R1
1784	MCTP2_859/rA1	AAELKL	58	17	experimental		PTPN6
1785	TREML1_281/rA1	AATVIF	58	18	experimental		PTPN11
1786	IRS4_1016/rA1	AIEVIF	58	19	experimental		PLCG1,PTPN11
1787	IRS1_46/rA1	AYENEK	58	20	experimental		IRS1
1788	NTAL_136/rA1	AQNFSK	58	21	experimental		GRB2
1789	IL8RA_46/rA1	AALVFL	58	22	experimental		PTPN6
1790	SCN11A_1643/rA1	ASALSD	58	23	experimental		PTPN11,PTPN6
1791	LAT_255/rA1	AENLQE	58	24	experimental		GRAP,VAV1,PLCG1,GRB2,ZAP70
1792	PTPN4_324/rA1	AFTLGS	58	25	experimental		PTPN6
1793	IFNAR1_466/rA1	AVFFPS	58	26	experimental		TYK2,STAT3,STAT2,STAT1
1794	LAT_200/rA1	AVNVPE	58	27	experimental		GRAP2,GRAP,VAV1,PLCG1,GRB2,ZAP70,PIK3R1
1795	XPO7_669/rA1	ATALGR	58	28	experimental		PTPN11,PTPN6
1796	MK10_223/rA1	AVVTRY	58	29	experimental		MK10_HUMAN
1797	RASA1_619/rA1	ALNSVQ	58	30	experimental		GRB2
1798	OR12D2_251/rA1	AAPVLF	58	31	experimental		PTPN6
1799	PIGM_47	yTDIDY	59	1	experimental		PTPN6
1800	IL1RL1_99	yANVTI	59	2	experimental		GRB2,MATK
1801	IL4R_713	ySALTC	59	3	experimental		PTPN11,INPP5D,PTPN6,SHC1
1802	BCAR1_664	yDYVHL	59	4	experimental		SRC,NCK1,FYN,FES,LCK
1803	MET_1356	yVNVKC	59	5	experimental		INPP5D,INPPL1,PTPN11,PLCG1,GRB2,PIK3R1
1804	SSTR2_312	yAFLSD	59	6	experimental		PTPN11,PTPN6
1805	PTPN11_584	yENVGL	59	7	experimental		PTPN11,GRB2,FYN
1806	GPR175_205	ySLVVI	59	8	experimental		PTPN11,PTPN6
1807	FGFR3_552	yVLVEY	59	9	experimental		GRB2,SHC1
1808	IRS4_921	yVNMDF	59	10	experimental		GRB2,PIK3R1
1809	SIGLEC5_520	yASLSF	59	11	experimental		PTPN11,PTPN6
1810	CD84_279	yTYIMA	59	12	experimental		SH2D1B,PTPN11,SH2D1A,INPP5D,PTPN6
1811	TNFL6_258	yVNVSE	59	13	experimental		GRB2
1812	CLM1_249	yASLTL	59	14	experimental		INPP5D,PTPN6
1813	IL2RB_381	yFTYDP	59	15	experimental		PTPN6
1814	LAX1_268	yVNMTG	59	16	experimental		GRB2,PIK3R1
1815	NFAM1_220	yTALQR	59	17	experimental		SYK,ZAP70
1816	FRYL_680	ySNVF	59	18	experimental		GRB7-SH2a
1817	LEPR_986	yATLIS	59	19	experimental		PTPN11,CISH,SOCS3
1818	IRS1_612	yMPMSPG	59	20	experimental		IRS1
1819	FLT1_1213	yVNAFK	59	21	experimental		PTPN11,GRB2,NCK1,PIK3R1
1820	IL8RB_55	yALVFL	59	22	experimental		PTPN6
1821	gp60SU_498	ySHLSP	59	23	experimental		SYK
1822	LAX1_294	yENVPA	59	24	experimental		GRB2
1823	mFCERB_210	yEELNV	59	25	experimental		SRC,SHC1,SYK,FYN,FGR,LCK
1824	PLCG1_292	yFFLDE	59	26	experimental		PTPN6
1825	KIT_703	yKNLLH	59	27	experimental		GRB2
1826	CEACAM1_493	ySTLNF	59	28	experimental		PTPN11,PTPN6
1827	INSR_1185	yETDYY	59	29	experimental		APS,PTPN11,SH2B1,GRB14,GRB10
1828	MYO3B_1275	yYNQLN	59	30	experimental		GRB2
1829	GRM2_647	ySALLT	59	31	experimental		PTPN6
1830	PIGM_47/rA1	ATDIDY	60	1	experimental		PTPN6
1831	IL1RL1_99/rA1	AANVTI	60	2	experimental		GRB2,MATK
1832	IL4R_713/rA1	ASALTC	60	3	experimental		PTPN11,INPP5D,PTPN6,SHC1
1833	BCAR1_664/rA1	ADYVHL	60	4	experimental		SRC,NCK1,FYN,FES,LCK
1834	MET_1356/rA1	AVNVKC	60	5	experimental		INPP5D,INPPL1,PTPN11,PLCG1,GRB2,PIK3R1
1835	SSTR2_312/rA1	AAFLSD	60	6	experimental		PTPN11,PTPN6
1836	PTPN11_584/rA1	AENVGL	60	7	experimental		PTPN11,GRB2,FYN
1837	GPR175_205/rA1	ASLVVI	60	8	experimental		PTPN11,PTPN6
1838	FGFR3_552/rA1	AVLVEY	60	9	experimental		GRB2,SHC1
1839	IRS4_921/rA1	AVNMDF	60	10	experimental		GRB2,PIK3R1
1840	SIGLEC5_520/rA1	AASLSF	60	11	experimental		PTPN11,PTPN6
1841	CD84_279/rA1	ATYIMA	60	12	experimental		SH2D1B,PTPN11,SH2D1A,INPP5D,PTPN6
1842	TNFL6_258/rA1	AVNVSE	60	13	experimental		GRB2
1843	CLM1_249/rA1	AASLTL	60	14	experimental		INPP5D,PTPN6
1844	IL2RB_381/rA1	AFTYDP	60	15	experimental		PTPN6
1845	LAX1_268/rA1	AVNMTG	60	16	experimental		GRB2,PIK3R1
1846	NFAM1_220/rA1	ATALQR	60	17	experimental		SYK,ZAP70
1847	FRYL_680/rA1	ASNVF	60	18	experimental		GRB7-SH2a
1848	LEPR_986/rA1	AATLIS	60	19	experimental		PTPN11,CISH,SOCS3
1849	IRS1_612/rA1	AMPMSPG	60	20	experimental		IRS1
1850	FLT1_1213/rA1	AVNAFK	60	21	experimental		PTPN11,GRB2,NCK1,PIK3R1
1851	IL8RB_55/rA1	AALVFL	60	22	experimental		PTPN6
1852	gp60SU_498/rA1	ASHLSP	60	23	experimental		SYK
1853	LAX1_294/rA1	AENVPA	60	24	experimental		GRB2
1854	mFCERB_210/rA1	AEELNV	60	25	experimental		SRC,SHC1,SYK,FYN,FGR,LCK
1855	PLCG1_292/rA1	AFFLDE	60	26	experimental		PTPN6
1856	KIT_703/rA1	AKNLLH	60	27	experimental		GRB2
1857	CEACAM1_493/rA1	ASTLNF	60	28	experimental		PTPN11,PTPN6
1858	INSR_1185/rA1	AETDYY	60	29	experimental		APS,PTPN11,SH2B1,GRB14,GRB10
1859	MYO3B_1275/rA1	AYNQLN	60	30	experimental		GRB2
1860	GRM2_647/rA1	ASALLT	60	31	experimental		PTPN6
1861	PTPN18_281	yRFLYH	61	1	experimental		TEC
1862	IRS1_47	yENEKK	61	2	experimental		GRB2,SH3BP2
1863	SIG10_667	yATLNF	61	3	experimental		PTPN11,PTPN6
1864	CASL_629	yDYVHL	61	4	experimental		SRC,FYN
1865	NTAL_233	yVNGEV	61	5	experimental		GRB2
1866	CXCR7_315	ySFINR	61	6	experimental		PTPN11,PTPN6
1867	FAK1_925	yENVTG	61	7	experimental		SRC,STAT3,SHC1,GRB2,FES,SH3BP2
1868	FGFR2_561	yVIVEY	61	8	experimental		PLCG2,PLCG1,GRB2,PTPN11,SHC1
1869	MAPK3_145	yFLYQI	61	9	experimental		PTPN6
1870	rIRS1_895	yVNIEF	61	10	experimental		PTPN11,GRB2,PIK3R1
1871	SIGLEC9_433	yASLSF	61	11	experimental		PTPN6
1872	CTLA4_177	ySFLLT	61	12	experimental		PTPN11,FYN
1873	PTPRA_295	yINASF	61	13	experimental		GRB2
1874	OR8D1_223	ySILHI	61	14	experimental		PTPN6
1875	DYRA_219	yYIVHL	61	15	experimental		DYRA_HUMAN
1876	LC7L2_173	yRNSMP	61	16	experimental		GRB2
1877	PAR1_337	ySFLSH	61	17	experimental		PTPN11,PTPN6
1878	FRYL_680	ySNVF	61	18	experimental		GRB7-SH2a
1879	IL8RA_46	yALVFL	61	19	experimental		PTPN6
1880	IRS1_632	yMPMSPK	61	20	experimental		IRS1
1881	LAT_255	yENLQE	61	21	experimental		GRAP,VAV1,PLCG1,GRB2,ZAP70
1882	mSHPS1_313	yTSLFL	61	22	experimental		PTPN11
1883	mCD22_837	ySELVQ	61	23	experimental		SYK,PLCG1,PTPN6
1884	SPTAN1_2430	yQNLTR	61	24	experimental		GRB2
1885	FRS3_455	yAVIDL	61	25	experimental		PTPN11
1886	mCEACAM1_488	yTVLNF	61	26	experimental		PTPN11,PTPN6,SHC1
1887	CSF1R_923	yANLPS	61	27	experimental		GRB2
1888	OR12D2_251	yAPVLF	61	28	experimental		PTPN6
1889	JAK2_201	yNSVSY	61	29	experimental		PTPN11
1890	JUNB_182	yTNLSS	61	30	experimental		ABL1
1891	GRM3_656	ySALLT	61	31	experimental		PTPN6
1892	PTPN18_281/rA1	ARFLYH	62	1	experimental		TEC
1893	IRS1_47/rA1	AENEKK	62	2	experimental		GRB2,SH3BP2
1894	SIG10_667/rA1	AATLNF	62	3	experimental		PTPN11,PTPN6
1895	CASL_629/rA1	ADYVHL	62	4	experimental		SRC,FYN
1896	NTAL_233/rA1	AVNGEV	62	5	experimental		GRB2
1897	CXCR7_315/rA1	ASFINR	62	6	experimental		PTPN11,PTPN6
1898	FAK1_925/rA1	AENVTG	62	7	experimental		SRC,STAT3,SHC1,GRB2,FES,SH3BP2
1899	FGFR2_561/rA1	AVIVEY	62	8	experimental		PLCG2,PLCG1,GRB2,PTPN11,SHC1
1900	MAPK3_145/rA1	AFLYQI	62	9	experimental		PTPN6
1901	rIRS1_895/rA1	AVNIEF	62	10	experimental		PTPN11,GRB2,PIK3R1
1902	SIGLEC9_433/rA1	AASLSF	62	11	experimental		PTPN6
1903	CTLA4_177/rA1	ASFLLT	62	12	experimental		PTPN11,FYN
1904	PTPRA_295/rA1	AINASF	62	13	experimental		GRB2
1905	OR8D1_223/rA1	ASILHI	62	14	experimental		PTPN6
1906	DYRA_219/rA1	AYIVHL	62	15	experimental		DYRA_HUMAN
1907	LC7L2_173/rA1	ARNSMP	62	16	experimental		GRB2
1908	PAR1_337/rA1	ASFLSH	62	17	experimental		PTPN11,PTPN6
1909	FRYL_680/rA1	ASNVF	62	18	experimental		GRB7-SH2a
1910	IL8RA_46/rA1	AALVFL	62	19	experimental		PTPN6
1911	IRS1_632/rA1	AMPMSPK	62	20	experimental		IRS1
1912	LAT_255/rA1	AENLQE	62	21	experimental		GRAP,VAV1,PLCG1,GRB2,ZAP70
1913	mSHPS1_313/rA1	ATSLFL	62	22	experimental		PTPN11
1914	mCD22_837/rA1	ASELVQ	62	23	experimental		SYK,PLCG1,PTPN6
1915	SPTAN1_2430/rA1	AQNLTR	62	24	experimental		GRB2
1916	FRS3_455/rA1	AAVIDL	62	25	experimental		PTPN11
1917	mCEACAM1_488/rA1	ATVLNF	62	26	experimental		PTPN11,PTPN6,SHC1
1918	CSF1R_923/rA1	AANLPS	62	27	experimental		GRB2
1919	OR12D2_251/rA1	AAPVLF	62	28	experimental		PTPN6
1920	JAK2_201/rA1	ANSVSY	62	29	experimental		PTPN11
1921	JUNB_182/rA1	ATNLSS	62	30	experimental		ABL1
1922	GRM3_656/rA1	ASALLT	62	31	experimental		PTPN6
1923	BCAR1_664	yDYVHL	63	1	experimental		SRC,NCK1,FYN,FES,LCK
1924	PTPN11_546	yTNIKY	63	2	experimental		PTPN11,GRB2,FYN,SOCS3
1925	mNFAM1_215	yTSLQR	63	3	experimental		SYK,ZAP70
1926	CD300A_267	yASVVF	63	4	experimental		PTPN11,PTPN6
1927	EGFR_1110	yHNQPL	63	5	experimental		GRB2
1928	GRM4_667	yAALLT	63	6	experimental		PTPN6
1929	LAX1_373	yENVLT	63	7	experimental		GRB2
1930	FRS2_471	yAVIDI	63	8	experimental		PTPN11
1931	CD84_279	yTYIMA	63	9	experimental		SH2D1B,PTPN11,SH2D1A,INPP5D,PTPN6
1932	SHC1_427	yVNIQN	63	10	experimental		GRB2
1933	CLM1_249	yASLTL	63	11	experimental		INPP5D,PTPN6
1934	PTPRC_1216	yQFLYD	63	12	experimental		LCK
1935	PTPRC_1015	yINASF	63	13	experimental		GRB2
1936	mLILRB4_322	yAQLCI	63	14	experimental		PTPN11,INPP5D,PTPN6
1937	RASA1_615	yCNIYL	63	15	experimental		GRB2
1938	CelLET23_1290	yYNEPH	63	16	experimental		GRB2
1939	PTPN4_69	yFGLQL	63	17	experimental		PTPN6
1940	IRS2_823	yVLMSS	63	18	experimental		PIK3R1
1941	IL8RB_55	yALVFL	63	19	experimental		PTPN6
1942	IRS1_662	yMMMSP	63	20	experimental		IRS1
1943	LAX1_294	yENVPA	63	21	experimental		GRB2
1944	FCERB_219	yEELNI	63	22	experimental		SYK,LYN,FES,SHC1
1945	HEXB_277	yARLRG	63	23	experimental		PTPN11,PTPN6
1946	DYST_959	yQNVLT	63	24	experimental		GRB2
1947	CBL_869	ySYQDI	63	25	experimental		CRKL
1948	SHC1_349	yYNDFP	63	26	experimental		GRB2,GRAP2,INPP5D
1949	IL1RL1_99	yANVTI	63	27	experimental		GRB2,MATK
1950	GRM2_647	ySALLT	63	28	experimental		PTPN6
1951	CD22_762	yTTLRF	63	29	experimental		PTPN6
1952	MET_1356	yVNVKC	63	30	experimental		INPP5D,INPPL1,PTPN11,PLCG1,GRB2,PIK3R1
1953	SIT1_127	yTSLQL	63	31	experimental		PTPN11
1954	BCAR1_664/rA1	ADYVHL	64	1	experimental		SRC,NCK1,FYN,FES,LCK
1955	PTPN11_546/rA1	ATNIKY	64	2	experimental		PTPN11,GRB2,FYN,SOCS3
1956	mNFAM1_215/rA1	ATSLQR	64	3	experimental		SYK,ZAP70
1957	CD300A_267/rA1	AASVVF	64	4	experimental		PTPN11,PTPN6
1958	EGFR_1110/rA1	AHNQPL	64	5	experimental		GRB2
1959	GRM4_667/rA1	AAALLT	64	6	experimental		PTPN6
1960	LAX1_373/rA1	AENVLT	64	7	experimental		GRB2
1961	FRS2_471/rA1	AAVIDI	64	8	experimental		PTPN11
1962	CD84_279/rA1	ATYIMA	64	9	experimental		SH2D1B,PTPN11,SH2D1A,INPP5D,PTPN6
1963	SHC1_427/rA1	AVNIQN	64	10	experimental		GRB2
1964	CLM1_249/rA1	AASLTL	64	11	experimental		INPP5D,PTPN6
1965	PTPRC_1216/rA1	AQFLYD	64	12	experimental		LCK
1966	PTPRC_1015/rA1	AINASF	64	13	experimental		GRB2
1967	mLILRB4_322/rA1	AAQLCI	64	14	experimental		PTPN11,INPP5D,PTPN6
1968	RASA1_615/rA1	ACNIYL	64	15	experimental		GRB2
1969	CelLET23_1290/rA1	AYNEPH	64	16	experimental		GRB2
1970	PTPN4_69/rA1	AFGLQL	64	17	experimental		PTPN6
1971	IRS2_823/rA1	AVLMSS	64	18	experimental		PIK3R1
1972	IL8RB_55/rA1	AALVFL	64	19	experimental		PTPN6
1973	IRS1_662/rA1	AMMMSP	64	20	experimental		IRS1
1974	LAX1_294/rA1	AENVPA	64	21	experimental		GRB2
1975	FCERB_219/rA1	AEELNI	64	22	experimental		SYK,LYN,FES,SHC1
1976	HEXB_277/rA1	AARLRG	64	23	experimental		PTPN11,PTPN6
1977	DYST_959/rA1	AQNVLT	64	24	experimental		GRB2
1978	CBL_869/rA1	ASYQDI	64	25	experimental		CRKL
1979	SHC1_349/rA1	AYNDFP	64	26	experimental		GRB2,GRAP2,INPP5D
1980	IL1RL1_99/rA1	AANVTI	64	27	experimental		GRB2,MATK
1981	GRM2_647/rA1	ASALLT	64	28	experimental		PTPN6
1982	CD22_762/rA1	ATTLRF	64	29	experimental		PTPN6
1983	MET_1356/rA1	AVNVKC	64	30	experimental		INPP5D,INPPL1,PTPN11,PLCG1,GRB2,PIK3R1
1984	SIT1_127/rA1	ATSLQL	64	31	experimental		PTPN11
1985	CASL_629	yDYVHL	65	1	experimental		SRC,FYN
1986	EGFR_1138	yLNTVQ	65	2	experimental		GRB2,PLCG1,ABL2,PTPN11,RASA1
1987	XPO7_669	yTALGR	65	3	experimental		PTPN11,PTPN6
1988	MK10_223	yVVTRY	65	4	experimental		MK10_HUMAN
1989	FLT3_969	yQNRRP	65	5	experimental		GRB2
1990	GRM7_670	yAALLT	65	6	experimental		PTPN6
1991	SOS1_974	yQNQPY	65	7	experimental		GRB2
1992	TUBA3_432	yEEVGV	65	8	experimental		FYN
1993	CTLA4_177	ySFLLT	65	9	experimental		PTPN11,FYN
1994	TIE1_1117	yVNMSL	65	10	experimental		PIK3R1
1995	OR8D1_223	ySILHI	65	11	experimental		PTPN6
1996	DAB1_198	yQYIVF	65	12	experimental		SRC,FYN
1997	ITPR3_1588	yKNIIE	65	13	experimental		GRB2
1998	CD22_822	ySELIQ	65	14	experimental		PTPN6
1999	SSTR1_226	yTFLMG	65	15	experimental		PTPN11
[truncated: 1,969 more rows]
